# Supplementary material
Source: PubMed Central journal article supplement (PMC6895501)
Supplement: ajtr0011-6860-f8.pdf [file ajtr0011-6860-f8.pdf]

# TGFβ1 induces cisplatin resistance of NSCLC by G6PD

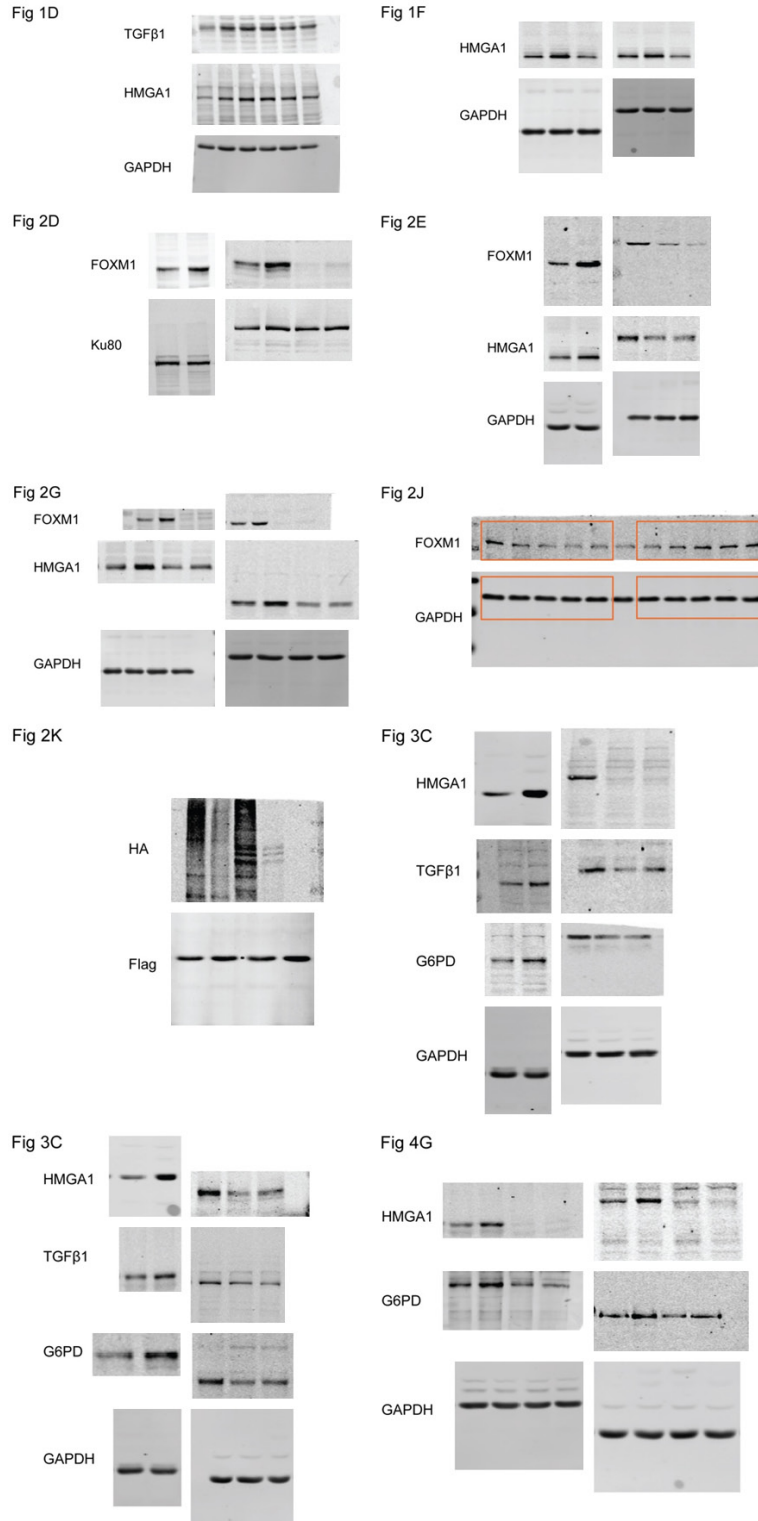

Figure S1. The original images of western blot.

## TGFβ1 induces cisplatin resistance of NSCLC by G6PD

**Table S1.** Primer sequences for qPCR and ChIP

|      | Gene name     | Forward primer (5'→3') | Reverse primer (5'→3') |
|------|---------------|------------------------|------------------------|
| qPCR | HMGA1         | GCTCCAAGAAGATCCGCATT   | CTCAGTGCCGTCCTTTTCTCT  |
|      | FOXO1         | AATTGCCCGAGCACTTGAA    | TCCACTTTGATGGGTCTCGC   |
|      | TGFβ1         | TGGTGGAAACCCACAACGAA   | ACACAGAGATCCGAGTCCT    |
|      | G6PD          | GACGACGAAGCGCAGACA     | GGTAGTGGTCGATGCGGTAG   |
|      | β-actin       | CTCCATCCTGGCCTCGCTGT   | GCTGTACCTTCACCGTTCC    |
| ChIP | G6PD promoter | GCCTGGTGACAGAGCGAGATTC | CAATTGAAGGTATCAACTTCTG |

**Table S2.** Differentially expressed genes (DEGs) between H1299<sup>siCtrl</sup> and H1299<sup>siHMGA1</sup> cells

| Gene         | Symbol   | En-trez_id | siCtrl#1 | siCtrl#2 | siHM-GA1#1 | siHM-GA1#2 | log2FC  | p value  | FDR       | Regulation     |
|--------------|----------|------------|----------|----------|------------|------------|---------|----------|-----------|----------------|
| NM_001204504 | DGKH     | 160851     | 2.05841  | 1.3246   | 0.00717477 | 0.00717289 | -3.2096 | 2.34E-55 | 6.42E-52  | Down-regulated |
| NM_015378    | VPS13D   | 55187      | 1.47887  | 0.983994 | 0.00075053 | 0.00106282 | -2.827  | 3.24E-42 | 5.09E-39  | Down-regulated |
| NM_145901    | HMGA1    | 3159       | 71.6378  | 56.8912  | 21.3693    | 19.1721    | -1.4693 | 2.95E-30 | 3.59E-27  | Down-regulated |
| NM_001291285 | FAT4     | 79633      | 1.68697  | 1.21199  | 0.228133   | 0.358392   | -1.4474 | 4.27E-13 | 1.20E-10  | Down-regulated |
| NM_000402    | G6PD     | 2539       | 9.2965   | 8.20298  | 1.75042    | 2.47879    | -1.4297 | 3.85E-14 | 1.28E-11  | Down-regulated |
| NM_001319078 | HMGA1    | 3159       | 27.322   | 29.8724  | 8.06472    | 10.421     | -1.3621 | 9.00E-20 | 4.49E-17  | Down-regulated |
| NM_001954    | DDR1     | 780        | 28.5531  | 20.0644  | 5.35907    | 9.25952    | -1.1846 | 7.19E-10 | 1.14E-07  | Down-regulated |
| NM_002131    | HMGA1    | 3159       | 209.129  | 198.602  | 86.6153    | 93.3262    | -1.129  | 1.47E-62 | 5.37E-59  | Down-regulated |
| NM_000660    | TGFβ1    | 7040       | 24.9804  | 23.1378  | 7.02684    | 10.9766    | -1.1099 | 5.33E-11 | 1.15E-08  | Down-regulated |
| NM_001300731 | AMBRA1   | 55626      | 3.30097  | 3.01052  | 1.12903    | 1.23228    | -1.071  | 1.54E-09 | 2.11E-07  | Down-regulated |
| NM_145899    | HMGA1    | 3159       | 379.427  | 349.397  | 164.129    | 178.886    | -1.037  | 3.55E-50 | 7.79E-47  | Down-regulated |
| NM_004723    | ARHGEF2  | 9181       | 10.3446  | 9.9513   | 3.53214    | 4.89658    | -1.0284 | 1.12E-10 | 2.20E-08  | Down-regulated |
| NM_002575    | SERPINB2 | 5055       | 8.47816  | 9.95415  | 3.94916    | 3.11087    | -0.9684 | 2.84E-07 | 2.23E-05  | Down-regulated |
| NM_001331012 | ITSN1    | 6453       | 3.87566  | 4.5212   | 1.96303    | 1.54096    | -0.9612 | 4.08E-08 | 4.03E-06  | Down-regulated |
| NM_019105    | TNXB     | 7148       | 34.423   | 35.0005  | 16.9011    | 18.3341    | -0.9417 | 3.67E-47 | 6.71E-44  | Down-regulated |
| NM_182981    | OSGIN1   | 29948      | 23.6916  | 18.1728  | 7.98835    | 10.2138    | -0.935  | 2.95E-08 | 3.14E-06  | Down-regulated |
| NM_001004356 | FGFRL1   | 53834      | 10.5877  | 10.5015  | 3.9254     | 5.48571    | -0.918  | 3.50E-08 | 3.56E-06  | Down-regulated |
| NM_001122630 | CDKN1C   | 1028       | 29.674   | 22.8108  | 12.5245    | 11.8843    | -0.9138 | 1.47E-09 | 2.04E-07  | Down-regulated |
| NM_000930    | PLAT     | 5327       | 45.727   | 40.2601  | 23.1871    | 19.8007    | -0.9049 | 9.49E-16 | 3.86E-13  | Down-regulated |
| NM_001297705 | ADGRL2   | 23266      | 3.02521  | 3.7029   | 1.66023    | 1.35946    | -0.8602 | 1.53E-06 | 8.80E-05  | Down-regulated |
| NM_001127361 | RNF19B   | 127544     | 9.41889  | 8.91271  | 4.56323    | 4.62722    | -0.838  | 8.27E-09 | 9.76E-07  | Down-regulated |
| NM_025182    | FAM214B  | 80256      | 4.55482  | 5.08499  | 2.28259    | 2.05393    | -0.8338 | 5.27E-06 | 0.0002507 | Down-regulated |
| NM_201384    | PLEC     | 5339       | 56.7497  | 49.8727  | 29.0487    | 30.8308    | -0.7916 | 5.81E-26 | 4.91E-23  | Down-regulated |
| NM_198490    | RAB43    | 339122     | 12.6457  | 9.54902  | 6.01523    | 5.43713    | -0.7902 | 1.91E-07 | 1.57E-05  | Down-regulated |
| NM_002555    | SLC22A18 | 5002       | 40.1338  | 30.7188  | 19.2196    | 17.3751    | -0.7878 | 1.32E-07 | 1.15E-05  | Down-regulated |
| NM_001300802 | RPS6KA4  | 8986       | 6.81595  | 5.6959   | 3.27211    | 2.88222    | -0.7852 | 4.80E-06 | 0.0002366 | Down-regulated |
| NM_001127398 | ERLEC1   | 27248      | 7.0088   | 6.77314  | 3.27236    | 3.59245    | -0.7765 | 5.83E-06 | 0.0002701 | Down-regulated |
| NM_004864    | GDF15    | 9518       | 393.736  | 329.66   | 205.87     | 200.455    | -0.769  | 7.61E-18 | 3.63E-15  | Down-regulated |
| NM_000213    | ITGB4    | 3691       | 82.5255  | 66.1775  | 40.5772    | 42.8491    | -0.764  | 2.08E-13 | 6.01E-11  | Down-regulated |
| NM_006666    | RUVBL2   | 10856      | 35.3016  | 38.5682  | 18.6296    | 21.9206    | -0.7633 | 6.38E-10 | 1.05E-07  | Down-regulated |
| NM_201379    | PLEC     | 5339       | 4.44338  | 6.50512  | 2.85558    | 2.80809    | -0.761  | 3.31E-06 | 0.0001747 | Down-regulated |
| NM_148415    | ATXN2L   | 11273      | 25.7002  | 24.026   | 14.4961    | 13.8266    | -0.7574 | 5.84E-17 | 2.57E-14  | Down-regulated |
| NM_201995    | SF1      | 7536       | 11.5858  | 11.0029  | 5.80243    | 6.57937    | -0.7564 | 9.41E-09 | 1.09E-06  | Down-regulated |
| NM_001329226 | LRP10    | 26020      | 17.8974  | 12.6391  | 8.2528     | 7.86782    | -0.7551 | 1.05E-06 | 6.61E-05  | Down-regulated |
| NM_001286723 | FAM120A  | 23196      | 155.519  | 138.558  | 84.183     | 86.0577    | -0.7448 | 1.05E-23 | 7.18E-21  | Down-regulated |
| NM_206854    | QKI      | 9444       | 1.18915  | 1.48802  | 0.737738   | 0.620569   | -0.7361 | 3.06E-05 | 0.0010803 | Down-regulated |
| NM_001005619 | ITGB4    | 3691       | 34.6279  | 32.3848  | 18.9346    | 20.2316    | -0.7335 | 8.39E-22 | 5.12E-19  | Down-regulated |
| NM_080744    | SSC4D    | 136853     | 16.6629  | 13.4617  | 7.37556    | 8.89088    | -0.7332 | 1.40E-06 | 8.25E-05  | Down-regulated |
| NM_181552    | CUX1     | 1523       | 4.62977  | 3.28809  | 2.17834    | 2.05951    | -0.7332 | 3.42E-06 | 0.0001789 | Down-regulated |
| NM_001794    | CDH4     | 1002       | 26.9031  | 16.0255  | 11.2971    | 10.8334    | -0.7264 | 3.12E-05 | 0.0010904 | Down-regulated |
| NM_178031    | TMEM132A | 54972      | 196.811  | 158.391  | 98.4663    | 107.178    | -0.721  | 2.75E-12 | 7.01E-10  | Down-regulated |
| NM_001330789 | LIMCH1   | 22998      | 2.16912  | 3.77987  | 1.39298    | 0.805367   | -0.7176 | 0.000572 | 0.0102201 | Down-regulated |

## TGFβ1 induces cisplatin resistance of NSCLC by G6PD

|              |          |        |         |         |         |         |         |          |           |                |
|--------------|----------|--------|---------|---------|---------|---------|---------|----------|-----------|----------------|
| NR_104603    | CRB2     | 286204 | 31.0932 | 19.163  | 13.0675 | 13.1692 | -0.7173 | 3.24E-05 | 0.0011266 | Down-regulated |
| NM_004292    | RIN1     | 9610   | 41.8127 | 30.9728 | 20.303  | 20.561  | -0.7082 | 4.29E-07 | 3.02E-05  | Down-regulated |
| NM_002146    | HOXB3    | 3213   | 8.40108 | 5.04637 | 2.93375 | 3.42351 | -0.7053 | 0.000337 | 0.0067577 | Down-regulated |
| NM_001102595 | DTX2     | 113878 | 7.50327 | 5.31738 | 2.43029 | 3.42148 | -0.7002 | 0.000494 | 0.0090079 | Down-regulated |
| NM_001291860 | HSPG2    | 3339   | 26.8037 | 27.3024 | 16.8994 | 15.7189 | -0.6991 | 2.78E-26 | 2.55E-23  | Down-regulated |
| NM_212503    | CDK18    | 5129   | 5.74312 | 4.38293 | 2.82086 | 1.84111 | -0.6927 | 0.000574 | 0.0102243 | Down-regulated |
| NM_005166    | APLP1    | 333    | 17.4832 | 12.879  | 8.46847 | 8.19621 | -0.6923 | 1.48E-05 | 0.0005882 | Down-regulated |
| NM_138565    | CTTN     | 2017   | 22.5081 | 15.0297 | 10.7901 | 9.45414 | -0.6878 | 5.25E-05 | 0.0015894 | Down-regulated |
| NM_001145044 | SLC03A1  | 28232  | 17.3453 | 11.6548 | 7.2352  | 8.21878 | -0.6859 | 8.63E-05 | 0.0023218 | Down-regulated |
| NM_003486    | SLC7A5   | 8140   | 211.665 | 181.034 | 112.957 | 123.467 | -0.6846 | 1.68E-15 | 6.58E-13  | Down-regulated |
| NM_005904    | SMAD7    | 4092   | 9.2714  | 7.78956 | 4.57883 | 5.00301 | -0.6839 | 8.14E-06 | 0.0003507 | Down-regulated |
| NM_001145794 | ANTXR2   | 118429 | 12.4233 | 9.70248 | 6.34663 | 5.75844 | -0.6826 | 4.00E-05 | 0.0012995 | Down-regulated |
| NM_001318829 | TSC2     | 7249   | 7.6304  | 4.06114 | 2.5621  | 2.93639 | -0.68   | 0.000694 | 0.0118261 | Down-regulated |
| NM_005529    | HSPG2    | 3339   | 104.789 | 96.038  | 58.8314 | 63.9588 | -0.6787 | 1.05E-24 | 7.72E-22  | Down-regulated |
| NM_030582    | COL18A1  | 80781  | 9.86531 | 7.03539 | 4.24662 | 5.08158 | -0.6771 | 4.07E-05 | 0.0013098 | Down-regulated |
| NM_025250    | TTYH3    | 80727  | 144.27  | 115.844 | 73.3611 | 82.2111 | -0.6744 | 2.82E-10 | 4.82E-08  | Down-regulated |
| NM_001031696 | PLD3     | 23646  | 8.7245  | 6.30666 | 4.17825 | 3.17049 | -0.6719 | 0.000634 | 0.0110469 | Down-regulated |
| NM_001002030 | ECHDC1   | 55862  | 18.2775 | 9.66604 | 7.02039 | 6.15841 | -0.6705 | 0.000845 | 0.0136305 | Down-regulated |
| NR_037941    | STX16    | 8675   | 6.49327 | 6.60443 | 3.85107 | 3.86364 | -0.6704 | 1.41E-07 | 1.20E-05  | Down-regulated |
| NM_005438    | FOSL1    | 8061   | 49.0343 | 43.9533 | 28.3721 | 27.4989 | -0.6687 | 3.86E-11 | 8.47E-09  | Down-regulated |
| NM_001098416 | HDAC7    | 51564  | 20.6516 | 17.0416 | 11.7731 | 10.5443 | -0.6656 | 1.03E-07 | 9.20E-06  | Down-regulated |
| NM_001038    | SCNN1A   | 6337   | 3.50022 | 5.05004 | 2.25189 | 1.80356 | -0.6633 | 0.000996 | 0.01534   | Down-regulated |
| NM_001284281 | PPP4R3A  | 55671  | 6.5869  | 3.59413 | 2.57335 | 1.91169 | -0.6612 | 0.001348 | 0.0191523 | Down-regulated |
| NM_024111    | CHAC1    | 79094  | 9.50163 | 7.12029 | 4.35919 | 4.2382  | -0.6536 | 0.000564 | 0.0100928 | Down-regulated |
| NM_001195267 | SSC5D    | 284297 | 9.47093 | 5.62915 | 3.59539 | 3.91173 | -0.6535 | 0.000918 | 0.0144983 | Down-regulated |
| NM_003718    | CDK13    | 8621   | 4.6576  | 3.48898 | 2.47188 | 2.09612 | -0.6487 | 0.00013  | 0.0031998 | Down-regulated |
| NM_033113    | ZNF628   | 89887  | 16.9552 | 12.6591 | 8.54466 | 8.8187  | -0.6441 | 1.15E-05 | 0.0004783 | Down-regulated |
| NM_003823    | TNFRSF6B | 8771   | 222.007 | 160.86  | 110.247 | 115.677 | -0.644  | 2.08E-06 | 0.0001159 | Down-regulated |
| NM_145903    | HMGA1    | 3159   | 10.7735 | 9.85789 | 5.58294 | 6.1336  | -0.6424 | 9.79E-05 | 0.0025732 | Down-regulated |
| NM_001282352 | ADAMTS10 | 81794  | 7.85068 | 4.22689 | 2.49517 | 2.78916 | -0.6372 | 0.002123 | 0.0263464 | Down-regulated |
| NM_152441    | FBXL14   | 144699 | 32.4952 | 20.0766 | 12.7581 | 15.6354 | -0.6371 | 0.000536 | 0.0096558 | Down-regulated |
| NM_004210    | NEURL1   | 9148   | 24.9788 | 19.4122 | 13.6737 | 13.1008 | -0.6364 | 8.78E-07 | 5.73E-05  | Down-regulated |
| NM_001330518 | PCYT2    | 5833   | 7.37844 | 5.5088  | 3.77507 | 3.6789  | -0.6345 | 7.16E-05 | 0.0019917 | Down-regulated |
| NM_001077261 | NCOR2    | 9612   | 56.7268 | 44.8887 | 31.9437 | 30.7676 | -0.6338 | 2.83E-09 | 3.57E-07  | Down-regulated |
| NM_003749    | IRS2     | 8660   | 24.4889 | 20.4339 | 13.5685 | 14.2358 | -0.6325 | 1.27E-09 | 1.81E-07  | Down-regulated |
| NM_000576    | IL1B     | 3553   | 40.6259 | 40.1246 | 25.2534 | 24.5165 | -0.6317 | 8.54E-10 | 1.32E-07  | Down-regulated |
| NM_020912    | FLYWCH1  | 84256  | 32.5115 | 20.0851 | 14.925  | 14.3727 | -0.6293 | 0.00037  | 0.0072619 | Down-regulated |
| NM_006478    | GAS2L1   | 10634  | 27.3189 | 18.5451 | 10.999  | 14.561  | -0.6284 | 0.000396 | 0.0075746 | Down-regulated |
| NM_001001329 | PRKCSH   | 5589   | 9.04326 | 7.39725 | 4.84671 | 4.56124 | -0.6264 | 0.000187 | 0.0043107 | Down-regulated |
| NM_145902    | HMGA1    | 3159   | 22.3535 | 23.8325 | 11.4153 | 15.6453 | -0.6245 | 6.98E-05 | 0.0019504 | Down-regulated |
| NM_000389    | CDKN1A   | 1026   | 540.76  | 480.14  | 325.753 | 320.638 | -0.6237 | 2.27E-21 | 1.25E-18  | Down-regulated |
| NM_001030010 | ALDH3B1  | 221    | 6.22856 | 5.80559 | 3.4198  | 3.49922 | -0.6203 | 0.000206 | 0.0046167 | Down-regulated |
| NM_015444    | TMEM158  | 25907  | 13.0179 | 13.1408 | 7.19346 | 8.31223 | -0.6185 | 5.39E-05 | 0.0016165 | Down-regulated |
| NM_032385    | FAXDC2   | 10826  | 5.16686 | 5.02771 | 2.89881 | 2.98678 | -0.6134 | 0.000288 | 0.0059803 | Down-regulated |
| NM_003483    | HMGA2    | 8091   | 8.09234 | 8.2851  | 5.24751 | 4.84563 | -0.6109 | 1.41E-06 | 8.25E-05  | Down-regulated |
| NM_198076    | COX20    | 116228 | 11.6156 | 10.2766 | 7.33644 | 4.97669 | -0.6108 | 0.000671 | 0.0115281 | Down-regulated |
| NM_138440    | VASN     | 114990 | 277.078 | 219.821 | 145.548 | 165.057 | -0.6095 | 3.47E-08 | 3.56E-06  | Down-regulated |
| NM_153813    | ZFPM1    | 161882 | 15.5156 | 14.282  | 8.65433 | 9.83989 | -0.6093 | 5.04E-07 | 3.50E-05  | Down-regulated |
| NM_198830    | ACLY     | 47     | 11.91   | 10.9781 | 7.94645 | 4.54959 | -0.6089 | 0.001272 | 0.0183019 | Down-regulated |
| NM_001323951 | MBD1     | 4152   | 8.62307 | 4.8266  | 3.02043 | 3.58478 | -0.6083 | 0.002814 | 0.0320824 | Down-regulated |
| NM_001113492 | 9-Sep    | 10801  | 9.62016 | 10.4597 | 6.85049 | 5.06992 | -0.6078 | 0.000127 | 0.0031617 | Down-regulated |
| NM_001199741 | GADD45A  | 1647   | 22.316  | 17.5746 | 12.0155 | 11.1774 | -0.6064 | 0.000272 | 0.005734  | Down-regulated |
| NM_006454    | MXD4     | 10608  | 48.2621 | 36.3998 | 25.6993 | 26.5947 | -0.6054 | 2.65E-06 | 0.0001436 | Down-regulated |
| NM_001330358 | MTHFR    | 4524   | 3.17352 | 2.61068 | 1.88272 | 1.35358 | -0.6049 | 0.000977 | 0.015172  | Down-regulated |
| NM_001042682 | RERE     | 473    | 23.0039 | 21.3534 | 13.3249 | 15.031  | -0.5975 | 1.83E-10 | 3.29E-08  | Down-regulated |
| NM_001100878 | MROH6    | 642475 | 23.4096 | 16.9988 | 9.45567 | 13.7345 | -0.5973 | 0.000764 | 0.0126457 | Down-regulated |
| NM_024536    | CHPF     | 79586  | 152.883 | 110.995 | 78.1321 | 85.6928 | -0.595  | 5.75E-06 | 0.0002674 | Down-regulated |

## TGFβ1 induces cisplatin resistance of NSCLC by G6PD

|              |          |        |         |         |         |          |         |          |           |                |
|--------------|----------|--------|---------|---------|---------|----------|---------|----------|-----------|----------------|
| NM_006848    | CCDC85B  | 11007  | 244.314 | 180.165 | 124.851 | 137.034  | -0.5936 | 7.00E-06 | 0.0003095 | Down-regulated |
| NM_175573    | ADRM1    | 11047  | 16.8798 | 10.7907 | 6.20823 | 8.10559  | -0.5935 | 0.002965 | 0.0330204 | Down-regulated |
| NM_005734    | HIPK3    | 10114  | 3.85133 | 3.54545 | 2.36055 | 0.968555 | -0.5931 | 0.004371 | 0.0439583 | Down-regulated |
| NM_182965    | SPHK1    | 8877   | 8.10886 | 5.72038 | 3.90891 | 3.49748  | -0.5925 | 0.002339 | 0.0282539 | Down-regulated |
| NM_130444    | COL18A1  | 80781  | 2.38956 | 2.28818 | 1.39406 | 1.38534  | -0.5896 | 0.000372 | 0.0072721 | Down-regulated |
| NM_024927    | PLEKHH3  | 79990  | 20.2776 | 14.0579 | 10.0338 | 10.5003  | -0.5889 | 0.000281 | 0.005886  | Down-regulated |
| NM_001009813 | MEIS3    | 56917  | 17.8658 | 12.4383 | 8.93069 | 8.71094  | -0.5888 | 0.000725 | 0.0121473 | Down-regulated |
| NM_001127266 | TMEM129  | 92305  | 24.1551 | 17.5151 | 13.2738 | 11.949   | -0.5887 | 0.000145 | 0.0035016 | Down-regulated |
| NM_001185077 | ARHGDI   | 396    | 23.9173 | 14.9886 | 11.4557 | 10.7108  | -0.5884 | 0.001202 | 0.0176163 | Down-regulated |
| NM_014963    | SBNO2    | 22904  | 85.2209 | 58.8891 | 41.4846 | 47.2842  | -0.5874 | 4.78E-05 | 0.0014832 | Down-regulated |
| NM_001029882 | AHDC1    | 27245  | 25.7665 | 20.7441 | 14.3458 | 15.1985  | -0.5866 | 3.12E-07 | 2.40E-05  | Down-regulated |
| NM_130802    | MEN1     | 4221   | 14.3777 | 9.39831 | 7.04326 | 6.74821  | -0.5858 | 0.000946 | 0.0148382 | Down-regulated |
| NM_001005360 | DNM2     | 1785   | 26.2152 | 16.1508 | 9.97915 | 13.8746  | -0.5842 | 0.001767 | 0.0232903 | Down-regulated |
| NM_024336    | IRX3     | 79191  | 39.2964 | 27.8107 | 19.0235 | 21.6337  | -0.5842 | 0.000186 | 0.0042923 | Down-regulated |
| NM_005560    | LAMA5    | 3911   | 206.875 | 177.643 | 119.501 | 130.417  | -0.5835 | 1.12E-12 | 3.08E-10  | Down-regulated |
| NM_025069    | ZNF703   | 80139  | 62.1668 | 51.6232 | 33.9637 | 38.5942  | -0.5827 | 1.98E-07 | 1.59E-05  | Down-regulated |
| NM_004104    | FASN     | 2194   | 100.395 | 85.0099 | 55.5483 | 64.0167  | -0.5824 | 2.78E-09 | 3.56E-07  | Down-regulated |
| NM_014726    | TBKBP1   | 9755   | 9.44035 | 7.91864 | 5.08353 | 5.71201  | -0.5809 | 3.71E-05 | 0.0012242 | Down-regulated |
| NM_013241    | FHOD1    | 29109  | 15.6628 | 12.8316 | 8.89332 | 9.07916  | -0.58   | 5.08E-06 | 0.0002435 | Down-regulated |
| NM_020210    | SEMA4B   | 10509  | 22.5911 | 18.3486 | 13.6639 | 12.1347  | -0.5799 | 6.77E-06 | 0.0003033 | Down-regulated |
| NM_015516    | TSKU     | 25987  | 26.0066 | 19.9475 | 14.5355 | 14.0742  | -0.5794 | 3.28E-05 | 0.0011345 | Down-regulated |
| NM_001322934 | NFKB2    | 4791   | 19.3119 | 17.4158 | 7.49783 | 13.198   | -0.579  | 0.002093 | 0.0261233 | Down-regulated |
| NM_018022    | TMEM51   | 55092  | 7.37877 | 9.62731 | 4.47418 | 5.06766  | -0.5783 | 0.002257 | 0.0277192 | Down-regulated |
| NM_001033053 | NLRP1    | 22861  | 3.5133  | 2.17873 | 1.55667 | 1.39626  | -0.5761 | 0.004337 | 0.0437748 | Down-regulated |
| NR_073080    | PHLDA3   | 23612  | 165.373 | 111.585 | 83.0162 | 87.4106  | -0.5734 | 0.000128 | 0.0031799 | Down-regulated |
| NM_020764    | CASKIN1  | 57524  | 2.90878 | 2.09558 | 1.29169 | 1.49109  | -0.5724 | 0.003037 | 0.033657  | Down-regulated |
| NM_006540    | NCOA2    | 10499  | 1.88335 | 2.7152  | 1.24555 | 0.411816 | -0.572  | 0.005079 | 0.0487558 | Down-regulated |
| NM_017983    | WIPI1    | 55062  | 7.50741 | 8.81966 | 4.87232 | 4.6844   | -0.5714 | 0.001413 | 0.0197352 | Down-regulated |
| NM_002228    | JUN      | 3725   | 218.357 | 180.166 | 125.436 | 133.734  | -0.5714 | 1.14E-09 | 1.67E-07  | Down-regulated |
| NM_001135999 | RUSC2    | 9853   | 7.43227 | 6.14377 | 3.83693 | 4.60933  | -0.5702 | 0.000118 | 0.0029867 | Down-regulated |
| NM_032823    | C9orf3   | 84909  | 7.449   | 8.96319 | 4.85799 | 5.16715  | -0.5702 | 0.000375 | 0.0073085 | Down-regulated |
| NM_004421    | DVL1     | 1855   | 38.1017 | 27.7036 | 20.1057 | 20.9795  | -0.5697 | 7.46E-05 | 0.0020635 | Down-regulated |
| NM_001282979 | TLE3     | 7090   | 9.47806 | 6.0807  | 5.00508 | 4.04134  | -0.5684 | 0.001816 | 0.0237779 | Down-regulated |
| NR_049765    | ZBTB7B   | 51043  | 10.7805 | 8.89342 | 6.77541 | 5.22866  | -0.5683 | 0.000428 | 0.0080256 | Down-regulated |
| NM_022566    | MESDC1   | 59274  | 90.3948 | 60.3829 | 44.2793 | 48.8629  | -0.5682 | 0.000198 | 0.0045056 | Down-regulated |
| NM_016154    | RAB4B    | 53916  | 17.2444 | 14.0988 | 10.0347 | 7.72898  | -0.5675 | 0.002432 | 0.0291132 | Down-regulated |
| NM_001347    | DGKQ     | 1609   | 11.7516 | 9.30881 | 6.46377 | 6.83114  | -0.5671 | 3.94E-05 | 0.001287  | Down-regulated |
| NM_024426    | WT1      | 7490   | 29.873  | 21.3323 | 15.3888 | 16.3789  | -0.5671 | 0.000173 | 0.0040377 | Down-regulated |
| NM_001098534 | BAG6     | 7917   | 31.6224 | 24.3697 | 16.1052 | 19.1661  | -0.5643 | 6.31E-05 | 0.0018084 | Down-regulated |
| NM_001039574 | KCNC4    | 3749   | 9.74189 | 7.60469 | 5.37666 | 5.41014  | -0.5641 | 0.0002   | 0.0045233 | Down-regulated |
| NM_001304815 | CIC      | 23152  | 22.4879 | 16.2039 | 10.9815 | 13.2566  | -0.5607 | 0.000165 | 0.0038805 | Down-regulated |
| NM_005944    | CD200    | 4345   | 30.6277 | 25.9444 | 16.883  | 19.3404  | -0.5605 | 9.11E-06 | 0.0003895 | Down-regulated |
| NM_015925    | LSR      | 51599  | 30.2656 | 25.6752 | 17.0021 | 18.9005  | -0.5601 | 5.67E-06 | 0.0002659 | Down-regulated |
| NM_173214    | NFAT5    | 10725  | 3.76026 | 4.9796  | 2.93422 | 2.51566  | -0.5575 | 0.000343 | 0.0068149 | Down-regulated |
| NM_198576    | AGRN     | 375790 | 734.063 | 566.062 | 403.531 | 444.08   | -0.5571 | 3.93E-07 | 2.84E-05  | Down-regulated |
| NM_152264    | SLC39A13 | 91252  | 28.3637 | 23.6129 | 17.0686 | 16.4678  | -0.5562 | 4.50E-06 | 0.0002246 | Down-regulated |
| NM_001080495 | TNRC18   | 84629  | 123.779 | 100.842 | 69.9354 | 77.6979  | -0.5559 | 2.15E-08 | 2.33E-06  | Down-regulated |
| NM_139162    | MIEF2    | 125170 | 12.8465 | 9.06406 | 6.43965 | 6.74531  | -0.5543 | 0.001359 | 0.0192513 | Down-regulated |
| NM_015037    | ZSWIM8   | 23053  | 11.5579 | 8.08844 | 4.85969 | 6.85759  | -0.5536 | 0.001912 | 0.0244679 | Down-regulated |
| NM_198925    | SEMA4B   | 10509  | 7.2245  | 8.12608 | 4.56709 | 5.14935  | -0.5529 | 0.000146 | 0.0035063 | Down-regulated |
| NM_002318    | LOXL2    | 4017   | 523.007 | 479.073 | 335.817 | 336.844  | -0.5499 | 6.94E-25 | 5.45E-22  | Down-regulated |
| NM_004472    | FOXO1    | 2297   | 63.2557 | 49.3927 | 32.4959 | 39.4861  | -0.5466 | 8.33E-05 | 0.0022695 | Down-regulated |
| NM_004409    | DMPK     | 1760   | 19.1229 | 10.6467 | 7.86467 | 8.98088  | -0.5465 | 0.004812 | 0.0468482 | Down-regulated |
| NM_178570    | RTN4RL2  | 349667 | 13.9491 | 12.063  | 7.46658 | 8.87922  | -0.5464 | 0.000349 | 0.0069033 | Down-regulated |
| NM_005475    | SH2B3    | 10019  | 7.93468 | 7.84975 | 5.16236 | 5.24905  | -0.5424 | 7.19E-07 | 4.79E-05  | Down-regulated |
| NM_198042    | PDLM2    | 64236  | 81.1085 | 58.6425 | 42.5397 | 46.0948  | -0.5416 | 0.000214 | 0.0047621 | Down-regulated |
| NM_001321096 | SREBF1   | 6720   | 94.5525 | 65.5626 | 49.4665 | 53.2408  | -0.5408 | 0.000129 | 0.003184  | Down-regulated |

## TGFβ1 induces cisplatin resistance of NSCLC by G6PD

|              |           |        |         |         |         |         |         |          |           |                |
|--------------|-----------|--------|---------|---------|---------|---------|---------|----------|-----------|----------------|
| NM_003311    | PHLDA2    | 7262   | 118.418 | 93.6351 | 63.6038 | 72.0516 | -0.5404 | 5.18E-05 | 0.0015836 | Down-regulated |
| NM_201525    | ADGRG1    | 9289   | 12.1038 | 9.3863  | 6.55873 | 7.16659 | -0.5395 | 0.000224 | 0.0049127 | Down-regulated |
| NM_001330740 | RUSC2     | 9853   | 8.8052  | 6.98064 | 4.67627 | 5.23678 | -0.5395 | 0.000704 | 0.0119223 | Down-regulated |
| NM_014238    | KSR1      | 8844   | 4.25254 | 3.86449 | 2.30356 | 2.71947 | -0.5394 | 0.001134 | 0.0168242 | Down-regulated |
| NM_001290051 | UHRF1     | 29128  | 7.42842 | 5.05102 | 3.07811 | 4.15341 | -0.539  | 0.004797 | 0.0468098 | Down-regulated |
| NM_005360    | MAF       | 4094   | 10.8522 | 6.78138 | 5.24139 | 4.93237 | -0.5385 | 0.004993 | 0.0482608 | Down-regulated |
| NM_001394    | DUSP4     | 1846   | 3.36835 | 2.99341 | 1.6981  | 2.17983 | -0.5376 | 0.002229 | 0.0274347 | Down-regulated |
| NM_001321123 | ITGB4     | 3691   | 371.372 | 296.703 | 217.625 | 227.535 | -0.5374 | 3.37E-08 | 3.53E-06  | Down-regulated |
| NM_001220778 | CDKN1A    | 1026   | 29.7246 | 28.3204 | 21.2624 | 15.9426 | -0.5362 | 0.000212 | 0.004739  | Down-regulated |
| NM_020360    | PLSCR3    | 57048  | 49.1584 | 41.2587 | 28.1965 | 31.1878 | -0.5361 | 4.30E-06 | 0.0002174 | Down-regulated |
| NM_017607    | PPP1R12C  | 54776  | 95.8882 | 66.1098 | 46.7849 | 56.0922 | -0.5358 | 0.000424 | 0.0079793 | Down-regulated |
| NM_000022    | ADA       | 100    | 25.6893 | 24.1882 | 16.9308 | 15.626  | -0.5348 | 1.74E-05 | 0.0006633 | Down-regulated |
| NM_001162371 | LOC728392 | 728392 | 45.1073 | 41.6426 | 28.0138 | 29.4056 | -0.5348 | 2.68E-07 | 2.12E-05  | Down-regulated |
| NM_001304762 | EVA1B     | 55194  | 117.3   | 80.3701 | 60.3281 | 63.449  | -0.5319 | 0.000696 | 0.0118563 | Down-regulated |
| NM_001163809 | WDR81     | 124997 | 8.33966 | 6.65677 | 5.2259  | 4.45533 | -0.5307 | 0.000228 | 0.0049948 | Down-regulated |
| NM_002616    | PER1      | 5187   | 3.66876 | 2.82175 | 1.86157 | 2.03218 | -0.5306 | 0.003819 | 0.039716  | Down-regulated |
| NM_002581    | PAPPA     | 5069   | 20.8127 | 21.1308 | 14.7261 | 13.7437 | -0.5299 | 7.86E-14 | 2.46E-11  | Down-regulated |
| NM_001242488 | ZSWIM8    | 23053  | 6.01779 | 4.69348 | 3.70312 | 3.05549 | -0.5288 | 0.001122 | 0.0166712 | Down-regulated |
| NM_019032    | ADAMTSL4  | 54507  | 22.0602 | 20.9056 | 13.9315 | 14.9943 | -0.528  | 5.40E-09 | 6.67E-07  | Down-regulated |
| NM_001114123 | ELK1      | 2002   | 9.87751 | 8.95116 | 5.89773 | 6.33007 | -0.5272 | 0.000145 | 0.0035021 | Down-regulated |
| NR_037688    | ACTG1     | 71     | 326.299 | 256.634 | 199.276 | 188.228 | -0.527  | 9.40E-07 | 5.97E-05  | Down-regulated |
| NM_174905    | FAM98C    | 147965 | 31.4285 | 20.7055 | 15.5925 | 15.9408 | -0.5259 | 0.003516 | 0.0375359 | Down-regulated |
| NM_203384    | RNH1      | 6050   | 19.1029 | 15.1306 | 12.1037 | 9.04471 | -0.5224 | 0.002675 | 0.0310646 | Down-regulated |
| NM_005354    | JUND      | 3727   | 187.303 | 130.367 | 91.9604 | 112.284 | -0.5214 | 0.000511 | 0.0092844 | Down-regulated |
| NM_020719    | PRR12     | 57479  | 10.7422 | 8.81578 | 5.99035 | 6.91353 | -0.5208 | 6.94E-05 | 0.0019486 | Down-regulated |
| NM_152611    | LRRN4     | 164312 | 98.1522 | 93.1158 | 64.4182 | 66.4427 | -0.519  | 2.46E-17 | 1.12E-14  | Down-regulated |
| NM_006133    | DAGLA     | 747    | 12.3853 | 9.86063 | 6.93566 | 7.71191 | -0.5183 | 0.000109 | 0.0028116 | Down-regulated |
| NM_015178    | RHOBTB2   | 23221  | 5.47685 | 5.38097 | 3.08481 | 3.93625 | -0.5176 | 0.000651 | 0.0112818 | Down-regulated |
| NM_018012    | KIF26B    | 55083  | 5.61223 | 4.47335 | 3.18437 | 3.40227 | -0.517  | 0.000314 | 0.0063907 | Down-regulated |
| NM_015073    | SIPA1L3   | 23094  | 26.3461 | 21.9582 | 15.6164 | 16.9616 | -0.5169 | 6.96E-07 | 4.66E-05  | Down-regulated |
| NM_001694    | ATP6VOC   | 527    | 107.614 | 106.685 | 55.5332 | 81.3081 | -0.5165 | 0.000927 | 0.0146295 | Down-regulated |
| NM_001166347 | SLC26A11  | 284129 | 13.0829 | 9.12946 | 6.78351 | 7.13533 | -0.5163 | 0.002443 | 0.0291943 | Down-regulated |
| NM_003047    | SLC9A1    | 6548   | 21.0534 | 21.032  | 12.8979 | 15.4019 | -0.5161 | 2.88E-06 | 0.0001551 | Down-regulated |
| NM_001455    | FOXO3     | 2309   | 5.50789 | 4.85036 | 3.58818 | 3.29832 | -0.5158 | 4.87E-05 | 0.0015033 | Down-regulated |
| NM_032792    | ZBTB45    | 84878  | 6.70846 | 5.77144 | 4.08211 | 3.60395 | -0.5152 | 0.004046 | 0.0414072 | Down-regulated |
| NM_152992    | POMZP3    | 22932  | 38.112  | 28.1172 | 17.8049 | 23.3373 | -0.5147 | 0.002871 | 0.0324992 | Down-regulated |
| NM_006079    | CITED2    | 10370  | 76.6288 | 66.6417 | 48.8571 | 48.0804 | -0.5142 | 4.34E-08 | 4.26E-06  | Down-regulated |
| NM_022842    | CDCP1     | 64866  | 8.62744 | 10.481  | 6.42981 | 6.25865 | -0.5131 | 9.25E-05 | 0.0024583 | Down-regulated |
| NM_001080855 | PXN       | 5829   | 48.0937 | 39.0396 | 28.2836 | 30.3586 | -0.5115 | 4.80E-06 | 0.0002366 | Down-regulated |
| NM_001924    | GADD45A   | 1647   | 353.622 | 324.701 | 235.386 | 228.999 | -0.5109 | 2.07E-16 | 8.75E-14  | Down-regulated |
| NM_003635    | NDST2     | 8509   | 7.36179 | 6.24839 | 3.97233 | 4.82354 | -0.5102 | 0.001157 | 0.0170824 | Down-regulated |
| NM_003043    | SLC6A6    | 6533   | 13.2084 | 13.9973 | 8.8647  | 9.65668 | -0.5101 | 1.47E-07 | 1.24E-05  | Down-regulated |
| NM_173564    | NYAP1     | 222950 | 4.54362 | 3.77806 | 2.37032 | 2.75472 | -0.5093 | 0.004812 | 0.0468482 | Down-regulated |
| NM_016270    | KLF2      | 10365  | 47.1887 | 41.9251 | 26.4432 | 33.0311 | -0.5093 | 4.40E-05 | 0.0013852 | Down-regulated |
| NM_014994    | MAPKBP1   | 23005  | 2.95123 | 3.05636 | 1.82643 | 2.09789 | -0.5074 | 0.000762 | 0.0126457 | Down-regulated |
| NM_001144950 | SSC5D     | 284297 | 9.67318 | 9.04988 | 5.89834 | 6.69043 | -0.5074 | 1.91E-05 | 0.0007198 | Down-regulated |
| NM_152600    | ZNF579    | 163033 | 130.464 | 89.9007 | 65.352  | 77.8148 | -0.5067 | 0.000834 | 0.0134714 | Down-regulated |
| NM_004943    | DMWD      | 1762   | 32.6817 | 21.5748 | 16.5475 | 18.228  | -0.5043 | 0.002102 | 0.0261759 | Down-regulated |
| NM_001013642 | TRNP1     | 388610 | 201.657 | 158.517 | 115.334 | 127.324 | -0.5037 | 1.07E-05 | 0.0004454 | Down-regulated |
| NM_005027    | PIK3R2    | 5296   | 66.5036 | 50.5968 | 37.4011 | 41.1124 | -0.5035 | 5.92E-05 | 0.0017293 | Down-regulated |
| NM_001014832 | PAK4      | 10298  | 41.9751 | 32.3168 | 22.6249 | 26.5449 | -0.5032 | 0.000308 | 0.0062767 | Down-regulated |
| NM_032429    | LZTS2     | 84445  | 13.6488 | 12.0891 | 8.68333 | 8.57586 | -0.503  | 5.57E-05 | 0.0016561 | Down-regulated |
| NM_001271875 | CUEDC1    | 404093 | 35.7858 | 25.9967 | 19.8346 | 21.0034 | -0.502  | 0.00041  | 0.0077816 | Down-regulated |
| NM_017883    | WDR13     | 64743  | 13.9528 | 11.5943 | 8.14724 | 8.55905 | -0.5017 | 0.000796 | 0.0130217 | Down-regulated |
| NM_024963    | FBXL18    | 80028  | 12.921  | 12.4319 | 8.76155 | 8.74312 | -0.5016 | 1.82E-10 | 3.29E-08  | Down-regulated |
| NM_014002    | IKBKE     | 9641   | 12.1704 | 9.92335 | 6.56387 | 7.92977 | -0.5012 | 0.000887 | 0.0141833 | Down-regulated |
| NR_037718    | EFEMP2    | 30008  | 24.5126 | 25.9902 | 15.6479 | 18.193  | -0.5006 | 7.75E-05 | 0.0021333 | Down-regulated |

## TGFβ1 induces cisplatin resistance of NSCLC by G6PD

|              |          |        |         |         |         |         |         |          |           |                |
|--------------|----------|--------|---------|---------|---------|---------|---------|----------|-----------|----------------|
| NM_207115    | ZNF580   | 51157  | 31.3328 | 26.8672 | 15.9132 | 21.0802 | -0.5002 | 0.002763 | 0.0316662 | Down-regulated |
| NM_014738    | TMEM94   | 9772   | 9.27107 | 7.85893 | 5.77987 | 5.77503 | -0.4995 | 4.22E-05 | 0.0013408 | Down-regulated |
| NM_021151    | CROT     | 54677  | 4.27451 | 4.01478 | 2.45787 | 2.74689 | -0.4988 | 0.005029 | 0.0485307 | Down-regulated |
| NM_032772    | ZNF503   | 84858  | 55.2493 | 40.9763 | 30.0135 | 34.0378 | -0.4987 | 0.00029  | 0.0060045 | Down-regulated |
| NM_022164    | TINAGL1  | 64129  | 292.24  | 237.316 | 174.103 | 187.572 | -0.4983 | 5.66E-07 | 3.89E-05  | Down-regulated |
| NM_001271938 | MEGF8    | 1954   | 17.5773 | 14.6826 | 11.1596 | 10.9651 | -0.4977 | 6.38E-07 | 4.30E-05  | Down-regulated |
| NM_017514    | PLXNA3   | 55558  | 8.18603 | 6.40145 | 4.72266 | 4.99426 | -0.4975 | 0.00036  | 0.0070831 | Down-regulated |
| NM_005737    | ARL4C    | 10123  | 10.8983 | 9.91992 | 6.96064 | 7.17246 | -0.4971 | 1.78E-05 | 0.0006746 | Down-regulated |
| NM_001135635 | C11orf68 | 83638  | 26.5543 | 18.8569 | 14.1331 | 14.9094 | -0.4964 | 0.002999 | 0.0333328 | Down-regulated |
| NM_018207    | TRIM62   | 55223  | 4.29659 | 3.70373 | 2.46758 | 2.63856 | -0.4935 | 0.004041 | 0.0413981 | Down-regulated |
| NM_001308046 | TNK2     | 10188  | 7.38961 | 5.5317  | 4.28919 | 4.09329 | -0.4921 | 0.002576 | 0.0303289 | Down-regulated |
| NR_028406    | FXD5     | 53827  | 22.2302 | 20.0052 | 14.1731 | 14.1931 | -0.491  | 0.000174 | 0.0040515 | Down-regulated |
| NM_001162383 | ARHGEF2  | 9181   | 42.255  | 39.8299 | 28.0482 | 29.151  | -0.4905 | 8.60E-12 | 2.01E-09  | Down-regulated |
| NM_024747    | HPS6     | 79803  | 21.5378 | 16.5395 | 12.1377 | 13.2243 | -0.4874 | 0.000767 | 0.0126686 | Down-regulated |
| NR_136702    | SFPQ     | 6421   | 31.4606 | 31.2873 | 16.9653 | 24.3418 | -0.4864 | 0.001905 | 0.0244077 | Down-regulated |
| NM_007286    | SYNPO    | 11346  | 29.2952 | 24.2755 | 18.0811 | 18.8218 | -0.4861 | 4.46E-06 | 0.0002236 | Down-regulated |
| NM_203434    | IER5L    | 389792 | 95.2489 | 94.1432 | 55.8749 | 73.2124 | -0.4846 | 7.84E-05 | 0.0021511 | Down-regulated |
| NM_014331    | SLC7A11  | 23657  | 16.4586 | 19.1569 | 12.812  | 11.7912 | -0.4844 | 5.24E-06 | 0.00025   | Down-regulated |
| NM_001282290 | ARHGAP27 | 201176 | 5.27332 | 5.11824 | 3.54614 | 3.43619 | -0.4843 | 0.000718 | 0.0120499 | Down-regulated |
| NM_032421    | CLIP2    | 7461   | 9.53346 | 8.16435 | 6.04239 | 6.06608 | -0.4842 | 5.25E-05 | 0.0015894 | Down-regulated |
| NM_175875    | SIX5     | 147912 | 31.9162 | 22.0891 | 16.3744 | 19.1043 | -0.4838 | 0.002354 | 0.0284102 | Down-regulated |
| NM_001081492 | KRT80    | 144501 | 18.4733 | 17.9798 | 12.1973 | 13.0959 | -0.4836 | 3.82E-07 | 2.80E-05  | Down-regulated |
| NM_014417    | BBC3     | 27113  | 42.5232 | 31.6693 | 20.6558 | 27.5453 | -0.4826 | 0.003517 | 0.0375359 | Down-regulated |
| NM_018986    | SH3TC1   | 54436  | 31.5304 | 22.5856 | 17.8772 | 18.4226 | -0.4825 | 0.000766 | 0.0126686 | Down-regulated |
| NM_001039999 | FAM83G   | 644815 | 14.4449 | 10.0491 | 8.03542 | 7.86395 | -0.4816 | 0.004108 | 0.0419264 | Down-regulated |
| NM_006927    | ST3GAL2  | 6483   | 10.649  | 8.10665 | 6.42385 | 6.09452 | -0.4816 | 0.001214 | 0.0177464 | Down-regulated |
| NM_000287    | PEX6     | 5190   | 14.2351 | 11.1322 | 9.01891 | 7.9304  | -0.4805 | 0.001137 | 0.0168282 | Down-regulated |
| NM_020452    | ATP8B2   | 57198  | 4.79818 | 5.76703 | 3.6728  | 3.42923 | -0.4791 | 0.00115  | 0.0169915 | Down-regulated |
| NM_001271223 | OBSCN    | 84033  | 1.56565 | 1.49422 | 1.05329 | 1.06738 | -0.4781 | 1.16E-05 | 0.0004815 | Down-regulated |
| NM_005165    | ALDOC    | 230    | 12.4626 | 11.5028 | 8.04958 | 7.7824  | -0.4779 | 0.002423 | 0.029077  | Down-regulated |
| NM_001018078 | FIGS     | 2356   | 18.6778 | 19.248  | 13.5505 | 12.5353 | -0.4778 | 3.98E-05 | 0.0012958 | Down-regulated |
| NM_032862    | TIGD5    | 84948  | 19.8603 | 14.8918 | 10.4129 | 12.4747 | -0.4777 | 0.002949 | 0.0329441 | Down-regulated |
| NM_004073    | PLK3     | 1263   | 23.099  | 18.8295 | 14.5301 | 14.0723 | -0.4765 | 0.000232 | 0.005033  | Down-regulated |
| NM_002149    | HPCAL1   | 3241   | 131.558 | 97.2799 | 72.5789 | 82.2132 | -0.4764 | 0.000458 | 0.0084616 | Down-regulated |
| NM_001135770 | PVR      | 5817   | 18.7527 | 13.8829 | 11.0329 | 10.148  | -0.4756 | 0.005107 | 0.0488931 | Down-regulated |
| NM_002205    | ITGA5    | 3678   | 49.391  | 48.5663 | 34.5889 | 34.6603 | -0.4745 | 1.14E-14 | 4.18E-12  | Down-regulated |
| NM_001141973 | ATP13A2  | 23400  | 14.7339 | 13.1999 | 8.59755 | 10.5107 | -0.4723 | 0.000322 | 0.0065175 | Down-regulated |
| NM_001142864 | PIEZO1   | 9780   | 105.364 | 84.2712 | 64.5079 | 67.9618 | -0.4719 | 2.65E-06 | 0.0001436 | Down-regulated |
| NM_003461    | ZYX      | 7791   | 120.132 | 109.872 | 76.7027 | 84.8429 | -0.4713 | 1.12E-08 | 1.28E-06  | Down-regulated |
| NM_005632    | CAPN15   | 6650   | 35.6403 | 24.396  | 18.4367 | 21.643  | -0.4708 | 0.002584 | 0.0303289 | Down-regulated |
| NM_001005731 | ITGB4    | 3691   | 197.785 | 214.262 | 139.607 | 152.203 | -0.469  | 1.20E-10 | 2.32E-08  | Down-regulated |
| NM_001280794 | EPHB6    | 2051   | 8.83128 | 7.01507 | 5.1066  | 5.57612 | -0.4683 | 0.001846 | 0.0238439 | Down-regulated |
| NM_001271014 | KTN1     | 3895   | 9.27246 | 8.39797 | 5.60796 | 6.55437 | -0.4678 | 0.000283 | 0.0059152 | Down-regulated |
| NM_014272    | ADAMTS7  | 11173  | 20.4255 | 15.5554 | 11.6521 | 12.9788 | -0.4667 | 0.000611 | 0.0107098 | Down-regulated |
| NM_173542    | PLBD2    | 196463 | 26.4879 | 26.4291 | 18.2219 | 19.0013 | -0.4664 | 3.20E-07 | 2.44E-05  | Down-regulated |
| NM_001173431 | OBSL1    | 23363  | 12.8052 | 9.01484 | 7.01815 | 7.6194  | -0.4658 | 0.002867 | 0.0324854 | Down-regulated |
| NR_045600    | SLC52A2  | 79581  | 53.3106 | 35.7469 | 28.532  | 30.6761 | -0.4658 | 0.00363  | 0.0383604 | Down-regulated |
| NM_024954    | UBTD1    | 80019  | 106.671 | 75.0845 | 59.2039 | 63.5876 | -0.4656 | 0.001389 | 0.0194808 | Down-regulated |
| NM_001173408 | OBSL1    | 23363  | 80.7712 | 63.3578 | 48.6333 | 51.629  | -0.4651 | 4.75E-05 | 0.001483  | Down-regulated |
| NM_138370    | PKDCC    | 91461  | 32.4947 | 23.6077 | 18.6934 | 19.2268 | -0.465  | 0.001663 | 0.0223212 | Down-regulated |
| NM_001099696 | REPIN1   | 29803  | 22.1202 | 20.9235 | 14.3467 | 15.7845 | -0.4647 | 7.82E-06 | 0.0003395 | Down-regulated |
| NM_080725    | SRXN1    | 140809 | 26.7407 | 23.8644 | 17.539  | 17.8876 | -0.4641 | 6.49E-06 | 0.0002945 | Down-regulated |
| NM_002359    | MAFG     | 4097   | 15.9351 | 13.3074 | 10.8513 | 9.34181 | -0.4636 | 0.000293 | 0.0060432 | Down-regulated |
| NM_021727    | FADS3    | 3995   | 248.834 | 195.263 | 152.192 | 157.065 | -0.4634 | 2.04E-05 | 0.0007665 | Down-regulated |
| NM_006516    | SLC2A1   | 6513   | 33.4611 | 30.6557 | 23.4987 | 21.7519 | -0.463  | 3.30E-07 | 2.48E-05  | Down-regulated |
| NM_001113182 | BRD2     | 6046   | 21.5406 | 20.6477 | 13.7705 | 15.896  | -0.4619 | 5.55E-06 | 0.0002616 | Down-regulated |
| NM_173854    | SLC41A1  | 254428 | 8.11196 | 7.84261 | 5.60551 | 5.5666  | -0.4614 | 3.36E-05 | 0.00115   | Down-regulated |

## TGFβ1 induces cisplatin resistance of NSCLC by G6PD

|              |          |        |         |         |         |         |         |          |           |                |
|--------------|----------|--------|---------|---------|---------|---------|---------|----------|-----------|----------------|
| NM_015103    | PLXND1   | 23129  | 26.5839 | 23.4368 | 17.3708 | 18.1105 | -0.4595 | 1.03E-07 | 9.20E-06  | Down-regulated |
| NM_007350    | PHLDA1   | 22822  | 19.7162 | 21.5534 | 15.5282 | 13.4846 | -0.4592 | 2.11E-05 | 0.00079   | Down-regulated |
| NM_178507    | OAF      | 220323 | 18.3543 | 13.9379 | 10.1717 | 11.3303 | -0.4589 | 0.004795 | 0.0468098 | Down-regulated |
| NM_001136053 | TPRA1    | 131601 | 66.622  | 55.0685 | 42.9034 | 42.1708 | -0.4586 | 2.82E-05 | 0.0010105 | Down-regulated |
| NM_033452    | TRIM47   | 91107  | 38.8035 | 34.2998 | 25.0436 | 26.331  | -0.4585 | 6.85E-06 | 0.0003058 | Down-regulated |
| NM_005884    | PAK4     | 10298  | 80.5945 | 59.414  | 45.2305 | 51.1358 | -0.4573 | 0.000782 | 0.0128632 | Down-regulated |
| NM_017617    | NOTCH1   | 4851   | 7.1226  | 6.04326 | 4.39484 | 4.81281 | -0.4566 | 0.000131 | 0.0032206 | Down-regulated |
| NM_001037330 | TRIM16L  | 147166 | 53.4891 | 57.6574 | 40.3168 | 38.1959 | -0.4563 | 1.31E-06 | 7.87E-05  | Down-regulated |
| NM_172353    | CD46     | 4179   | 14.9901 | 11.4543 | 7.80311 | 9.89125 | -0.4562 | 0.005056 | 0.048606  | Down-regulated |
| NM_032339    | MIEN1    | 84299  | 35.586  | 32.6815 | 24.5005 | 23.1452 | -0.4557 | 6.61E-05 | 0.0018834 | Down-regulated |
| NM_001243795 | CHST12   | 55501  | 10.0804 | 9.00496 | 5.96885 | 6.84501 | -0.4555 | 0.004715 | 0.0462248 | Down-regulated |
| NM_021228    | SCAF1    | 58506  | 78.5895 | 62.4869 | 46.2742 | 52.545  | -0.4554 | 8.45E-05 | 0.002292  | Down-regulated |
| NM_001130012 | SLC9A3R2 | 9351   | 11.9904 | 11.0542 | 7.30723 | 8.39627 | -0.4551 | 0.002128 | 0.0263725 | Down-regulated |
| NM_181336    | LEMD2    | 221496 | 49.5142 | 36.9785 | 28.2615 | 31.3516 | -0.4546 | 0.000913 | 0.0144535 | Down-regulated |
| NM_003040    | SLC4A2   | 6522   | 141.021 | 108.134 | 87.4548 | 87.5751 | -0.454  | 5.35E-05 | 0.0016097 | Down-regulated |
| NM_003646    | DGKZ     | 8525   | 28.6001 | 22.8705 | 17.1673 | 18.7031 | -0.454  | 0.000271 | 0.0057318 | Down-regulated |
| NM_017789    | SEMA4C   | 54910  | 21.2567 | 16.9461 | 13.1441 | 13.4574 | -0.453  | 0.00038  | 0.0073744 | Down-regulated |
| NM_002229    | JUNB     | 3726   | 58.1028 | 44.905  | 34.0093 | 37.1362 | -0.453  | 0.000676 | 0.01156   | Down-regulated |
| NM_001901    | CTGF     | 1490   | 43.2752 | 44.2597 | 29.4375 | 32.6104 | -0.4527 | 1.67E-06 | 9.52E-05  | Down-regulated |
| NM_022833    | FAM129B  | 64855  | 184.743 | 150.815 | 118.928 | 119.437 | -0.4516 | 1.41E-06 | 8.25E-05  | Down-regulated |
| NM_003780    | B4GALT2  | 8704   | 104.508 | 74.6591 | 58.0615 | 65.1472 | -0.45   | 0.001537 | 0.0210189 | Down-regulated |
| NM_181892    | UBE2D3   | 7323   | 16.8676 | 13.4777 | 9.55214 | 11.4029 | -0.4499 | 0.001443 | 0.0200095 | Down-regulated |
| NM_006312    | NCOR2    | 9612   | 43.9371 | 35.4279 | 27.3669 | 28.9127 | -0.4498 | 1.43E-05 | 0.0005679 | Down-regulated |
| NM_001330645 | ADGRL2   | 23266  | 4.32146 | 5.07735 | 3.47157 | 2.93626 | -0.4493 | 0.003615 | 0.0382714 | Down-regulated |
| NM_001199417 | ARHGAP23 | 57636  | 176.819 | 148.703 | 111.561 | 120.94  | -0.4484 | 4.15E-07 | 2.98E-05  | Down-regulated |
| NM_001127621 | GALE     | 2582   | 36.3614 | 36.4323 | 24.4369 | 26.8608 | -0.4482 | 3.49E-05 | 0.0011718 | Down-regulated |
| NM_001297654 | DDR1     | 780    | 61.61   | 49.2381 | 37.904  | 40.0853 | -0.4479 | 0.000109 | 0.0028095 | Down-regulated |
| NM_203403    | LURAP1L  | 286343 | 10.0461 | 8.95848 | 5.98241 | 7.02179 | -0.4472 | 0.003059 | 0.0337563 | Down-regulated |
| NM_023083    | CAPN10   | 11132  | 16.9353 | 13.3647 | 10.4902 | 10.4033 | -0.4466 | 0.001708 | 0.0226811 | Down-regulated |
| NM_145057    | CDC42EP5 | 148170 | 152.299 | 116.808 | 89.1654 | 96.1655 | -0.4466 | 0.000709 | 0.0119724 | Down-regulated |
| NM_182557    | BCL9L    | 283149 | 87.9123 | 76.9363 | 57.4363 | 61.0308 | -0.4463 | 6.68E-09 | 7.97E-07  | Down-regulated |
| NM_002204    | ITGA3    | 3675   | 577.602 | 512.258 | 389.67  | 396.2   | -0.4457 | 3.19E-12 | 7.97E-10  | Down-regulated |
| NM_182919    | TICAM1   | 148022 | 17.7645 | 14.8052 | 11.5429 | 11.2179 | -0.4456 | 0.000553 | 0.0099437 | Down-regulated |
| NM_014601    | EHD2     | 30846  | 136.595 | 114.77  | 83.7718 | 95.0975 | -0.4451 | 8.87E-06 | 0.0003803 | Down-regulated |
| NM_001145524 | YPEL3    | 83719  | 29.0817 | 29.0702 | 19.1912 | 20.4919 | -0.4448 | 0.002463 | 0.0293324 | Down-regulated |
| NM_005524    | HES1     | 3280   | 46.5602 | 43.8067 | 29.6823 | 33.9335 | -0.4443 | 8.32E-05 | 0.0022695 | Down-regulated |
| NM_032357    | CCDC115  | 84317  | 14.7153 | 13.1666 | 10.4404 | 8.63754 | -0.4436 | 0.003618 | 0.0382714 | Down-regulated |
| NM_001145638 | GPSM1    | 26086  | 22.869  | 17.3235 | 12.9813 | 14.8434 | -0.4424 | 0.002098 | 0.0261501 | Down-regulated |
| NM_016174    | CERCAM   | 51148  | 14.4433 | 12.4296 | 8.69328 | 9.98889 | -0.442  | 0.001431 | 0.0199192 | Down-regulated |
| NM_001286365 | MAP7D1   | 55700  | 79.7943 | 62.703  | 46.5706 | 53.8489 | -0.4411 | 0.000328 | 0.0066387 | Down-regulated |
| NM_032789    | PARP10   | 84875  | 27.4342 | 20.9659 | 15.3505 | 18.2015 | -0.441  | 0.00216  | 0.0267059 | Down-regulated |
| NM_001306215 | ZNF827   | 152485 | 3.81291 | 4.0409  | 2.87026 | 2.65771 | -0.4407 | 0.000667 | 0.0114902 | Down-regulated |
| NM_033025    | SYDE1    | 85360  | 32.9569 | 27.1606 | 21.319  | 21.3342 | -0.4403 | 8.76E-05 | 0.0023512 | Down-regulated |
| NM_016423    | ZNF219   | 51222  | 53.0753 | 45.3824 | 31.502  | 38.1069 | -0.4394 | 0.000254 | 0.0054437 | Down-regulated |
| NM_020376    | PNPLA2   | 57104  | 102.402 | 85.1807 | 61.4864 | 71.5456 | -0.4389 | 0.000105 | 0.0027231 | Down-regulated |
| NM_001556    | IKBKB    | 3551   | 9.40254 | 8.69184 | 6.83647 | 5.87325 | -0.4383 | 0.000861 | 0.0138389 | Down-regulated |
| NM_001281    | TBCB     | 1155   | 43.1345 | 39.1755 | 28.5423 | 29.8703 | -0.4383 | 4.11E-05 | 0.0013178 | Down-regulated |
| NM_030935    | TSC22D4  | 81628  | 60.3409 | 46.9321 | 38.085  | 37.4993 | -0.4382 | 0.000391 | 0.0074975 | Down-regulated |
| NM_001135050 | IGSF9    | 57549  | 12.9013 | 13.1707 | 8.15925 | 10.1603 | -0.4382 | 0.000912 | 0.0144535 | Down-regulated |
| NM_152914    | NATD1    | 256302 | 12.9853 | 10.3367 | 7.95744 | 8.42057 | -0.438  | 0.000957 | 0.0149534 | Down-regulated |
| NM_021070    | LTBP3    | 4054   | 44.2417 | 42.61   | 31.8532 | 31.1272 | -0.438  | 1.13E-11 | 2.58E-09  | Down-regulated |
| NM_001308305 | AGAP3    | 116988 | 14.7724 | 13.466  | 8.45386 | 11.0185 | -0.4379 | 0.003852 | 0.0399464 | Down-regulated |
| NM_001199    | BMP1     | 649    | 20.2934 | 20.6349 | 14.6182 | 14.6779 | -0.4375 | 1.25E-05 | 0.0005094 | Down-regulated |
| NM_001145106 | FIBCD1   | 84929  | 23.4246 | 16.9123 | 13.7387 | 14.108  | -0.4366 | 0.003666 | 0.0386359 | Down-regulated |
| NM_001282142 | TFE3     | 7030   | 31.3551 | 26.3884 | 20.9439 | 20.2727 | -0.4356 | 5.60E-05 | 0.0016561 | Down-regulated |
| NM_002406    | MGAT1    | 4245   | 67.4443 | 50.9261 | 40.7857 | 42.6592 | -0.4355 | 0.000625 | 0.0109094 | Down-regulated |
| NM_024876    | COQ8B    | 79934  | 20.5326 | 16.8179 | 12.344  | 13.8091 | -0.4354 | 0.001472 | 0.0203301 | Down-regulated |

## TGFβ1 induces cisplatin resistance of NSCLC by G6PD

|              |          |        |         |         |         |         |         |          |           |                |
|--------------|----------|--------|---------|---------|---------|---------|---------|----------|-----------|----------------|
| NM_001320547 | WDR6     | 11180  | 15.5803 | 12.5399 | 9.24467 | 10.492  | -0.435  | 0.001378 | 0.0194258 | Down-regulated |
| NM_001309443 | SPARC    | 6678   | 31.8123 | 31.3667 | 22.728  | 23.0261 | -0.4341 | 1.29E-08 | 1.46E-06  | Down-regulated |
| NM_001037806 | NCKAP5L  | 57701  | 23.3091 | 18.3827 | 14.084  | 15.4121 | -0.4339 | 0.000604 | 0.0106163 | Down-regulated |
| NM_025241    | UBXN6    | 80700  | 139.39  | 126.297 | 96.9046 | 95.18   | -0.4339 | 2.05E-09 | 2.68E-07  | Down-regulated |
| NM_005273    | GNB2     | 2783   | 182.24  | 158.826 | 121.316 | 124.413 | -0.4329 | 1.39E-07 | 1.20E-05  | Down-regulated |
| NM_152643    | KNDC1    | 85442  | 5.4991  | 4.49221 | 3.56742 | 3.44504 | -0.4321 | 0.00196  | 0.0249077 | Down-regulated |
| NM_006142    | SFN      | 2810   | 135.644 | 102.528 | 78.5492 | 88.1649 | -0.4313 | 0.001258 | 0.0182343 | Down-regulated |
| NM_181553    | CMTM3    | 123920 | 13.3355 | 12.5225 | 8.52712 | 9.46811 | -0.4309 | 0.002797 | 0.0320288 | Down-regulated |
| NM_004165    | RRAD     | 6236   | 52.6443 | 46.7488 | 36.0731 | 34.9243 | -0.4307 | 3.59E-05 | 0.0011991 | Down-regulated |
| NM_001317395 | KCTD10   | 83892  | 7.53866 | 7.4232  | 5.68894 | 4.83886 | -0.4305 | 0.001667 | 0.022357  | Down-regulated |
| NM_007284    | TWF2     | 11344  | 122.371 | 99.4881 | 76.0405 | 82.0853 | -0.43   | 0.000109 | 0.0028095 | Down-regulated |
| NM_001278212 | LRRC20   | 55222  | 10.8056 | 9.80592 | 7.7836  | 6.69488 | -0.4287 | 0.002039 | 0.0256469 | Down-regulated |
| NM_013449    | BAZ2A    | 11176  | 3.73649 | 3.93864 | 2.70792 | 2.77444 | -0.4282 | 0.000363 | 0.0071283 | Down-regulated |
| NM_016538    | SIRT7    | 51547  | 55.7865 | 40.9951 | 33.7422 | 33.8609 | -0.428  | 0.002689 | 0.0311153 | Down-regulated |
| NM_002017    | FLI1     | 2313   | 11.6855 | 11.0082 | 7.77572 | 8.50169 | -0.4276 | 0.000156 | 0.0037024 | Down-regulated |
| NM_019009    | TOLLIP   | 54472  | 34.4225 | 24.5556 | 20.0947 | 21.1721 | -0.4271 | 0.003354 | 0.0362841 | Down-regulated |
| NM_201380    | PLEC     | 5339   | 8.64818 | 9.01147 | 6.38068 | 6.50458 | -0.427  | 2.06E-08 | 2.27E-06  | Down-regulated |
| NM_194278    | ELMSAN1  | 91748  | 11.1133 | 9.62857 | 7.62563 | 7.32847 | -0.4269 | 4.04E-05 | 0.0013058 | Down-regulated |
| NM_001009880 | KIAA0930 | 23313  | 18.6362 | 17.4025 | 13.7642 | 12.3413 | -0.4261 | 6.98E-06 | 0.0003095 | Down-regulated |
| NM_001848    | COL6A1   | 1291   | 289.215 | 233.97  | 181.981 | 196.287 | -0.4254 | 1.32E-05 | 0.0005353 | Down-regulated |
| NM_001105079 | FBRS     | 64319  | 24.4019 | 20.2066 | 15.3536 | 16.611  | -0.4254 | 0.000242 | 0.0052271 | Down-regulated |
| NM_024050    | DDA1     | 79016  | 20.418  | 17.6387 | 13.5335 | 13.9009 | -0.4247 | 5.87E-05 | 0.0017202 | Down-regulated |
| NM_002332    | LRP1     | 4035   | 31.6985 | 35.6165 | 25.0602 | 24.086  | -0.4246 | 1.41E-07 | 1.20E-05  | Down-regulated |
| NM_030973    | MED25    | 81857  | 37.5517 | 28.2669 | 23.0169 | 23.4097 | -0.4231 | 0.002239 | 0.0275282 | Down-regulated |
| NM_145015    | MRGPRF   | 116535 | 90.157  | 73.0897 | 56.8214 | 60.5499 | -0.4221 | 0.000125 | 0.003125  | Down-regulated |
| NM_020066    | FMN2     | 56776  | 4.13706 | 4.0123  | 2.89827 | 2.92283 | -0.4215 | 0.001225 | 0.0178702 | Down-regulated |
| NM_014901    | RNF44    | 22838  | 15.8434 | 13.9005 | 9.90994 | 11.4136 | -0.4213 | 0.000481 | 0.0087958 | Down-regulated |
| NM_052920    | KLHL29   | 114818 | 21.1856 | 15.7927 | 12.7304 | 13.4618 | -0.4212 | 0.002269 | 0.0278018 | Down-regulated |
| NM_001142641 | FBRSL1   | 57666  | 19.546  | 15.4449 | 11.3321 | 13.4474 | -0.4204 | 0.002426 | 0.0290799 | Down-regulated |
| NM_030645    | SH3BP5L  | 80851  | 18.8299 | 15.7498 | 12.9654 | 11.7371 | -0.4201 | 0.00093  | 0.0146586 | Down-regulated |
| NM_198488    | FAM83H   | 286077 | 50.3451 | 38.9916 | 30.803  | 33.3945 | -0.4201 | 0.00041  | 0.0077816 | Down-regulated |
| NM_002133    | HMOX1    | 3162   | 15.1741 | 14.0864 | 10.5415 | 9.98498 | -0.4196 | 0.004443 | 0.04445   | Down-regulated |
| NM_152892    | LRWD1    | 222229 | 18.6835 | 16.1525 | 12.0773 | 12.7586 | -0.4195 | 0.001019 | 0.0155593 | Down-regulated |
| NM_001261403 | NFKB2    | 4791   | 12.7391 | 13.4915 | 9.60441 | 9.28047 | -0.4194 | 0.000261 | 0.0055492 | Down-regulated |
| NM_001699    | AXL      | 558    | 33.6066 | 33.4168 | 24.0567 | 25.1147 | -0.4194 | 2.37E-09 | 3.07E-07  | Down-regulated |
| NM_022489    | INF2     | 64423  | 66      | 49.6294 | 40.5613 | 42.3166 | -0.4193 | 0.000658 | 0.0113579 | Down-regulated |
| NM_004140    | LLGL1    | 3996   | 30.5324 | 27.4179 | 21.2231 | 21.0718 | -0.419  | 1.26E-06 | 7.67E-05  | Down-regulated |
| NM_003887    | ASAP2    | 8853   | 16.5507 | 17.0103 | 12.7935 | 11.6784 | -0.4187 | 6.67E-06 | 0.0003004 | Down-regulated |
| NM_001128636 | ELFN1    | 392617 | 61.4496 | 46.6827 | 36.6007 | 40.6847 | -0.4186 | 0.001058 | 0.0160321 | Down-regulated |
| NM_134323    | TARBP2   | 6895   | 32.2936 | 24.9088 | 19.4406 | 20.8742 | -0.4179 | 0.003295 | 0.0357844 | Down-regulated |
| NM_004064    | PANX1B   | 1027   | 32.7702 | 30.8639 | 23.005  | 23.351  | -0.4178 | 2.91E-06 | 0.000156  | Down-regulated |
| NM_052839    | CDC42EP2 | 56666  | 15.1815 | 12.3921 | 9.66851 | 9.96052 | -0.4178 | 0.001781 | 0.0234509 | Down-regulated |
| NM_145040    | PRKCDBP  | 112464 | 103.788 | 79.461  | 63.8455 | 65.6464 | -0.417  | 0.001693 | 0.0225904 | Down-regulated |
| NM_006034    | TP53I11  | 9537   | 12.7056 | 13.0896 | 9.59897 | 9.04241 | -0.4167 | 0.000214 | 0.0047598 | Down-regulated |
| NM_001409    | MEGF6    | 1953   | 63.4755 | 45.9509 | 37.6077 | 40.6755 | -0.4167 | 0.001362 | 0.0192513 | Down-regulated |
| NM_032038    | SPNS1    | 83985  | 31.0388 | 24.0556 | 20.8999 | 17.9161 | -0.4161 | 0.004215 | 0.0427763 | Down-regulated |
| NM_002861    | PCYT2    | 5833   | 11.4214 | 9.94225 | 8.12456 | 7.06253 | -0.4159 | 0.002679 | 0.0310675 | Down-regulated |
| NM_005194    | CEBPB    | 1051   | 251.649 | 199.038 | 149.277 | 174.803 | -0.4158 | 0.000412 | 0.0078044 | Down-regulated |
| NM_030927    | TSPAN14  | 81619  | 14.7661 | 14.8347 | 10.6537 | 11.0514 | -0.4142 | 1.45E-06 | 8.45E-05  | Down-regulated |
| NM_004281    | BAG3     | 9531   | 34.1149 | 30.7837 | 22.8214 | 24.4259 | -0.4142 | 2.76E-05 | 0.0009975 | Down-regulated |
| NM_006779    | CDC42EP2 | 10435  | 73.4075 | 59.0444 | 45.4193 | 49.903  | -0.4136 | 0.000523 | 0.0094591 | Down-regulated |
| NM_005929    | MELTF    | 4241   | 227.637 | 174.478 | 140.241 | 150.984 | -0.4133 | 0.000241 | 0.0052176 | Down-regulated |
| NM_014365    | HSPB8    | 26353  | 60.0554 | 52.9262 | 40.1153 | 42.1973 | -0.4126 | 1.64E-05 | 0.0006379 | Down-regulated |
| NM_004431    | EPHA2    | 1969   | 150.65  | 131.177 | 99.6561 | 107.547 | -0.4109 | 4.37E-07 | 3.05E-05  | Down-regulated |
| NM_152833    | C9orf69  | 90120  | 40.7413 | 31.9614 | 25.6005 | 26.7405 | -0.4102 | 0.001022 | 0.0155699 | Down-regulated |
| NM_004218    | RAB11B   | 9230   | 84.6132 | 74.0638 | 56.4447 | 59.2804 | -0.4094 | 1.69E-05 | 0.0006504 | Down-regulated |
| NM_001002909 | GPATCH8  | 23131  | 7.78087 | 6.89956 | 5.43044 | 5.26526 | -0.4093 | 0.000216 | 0.0047679 | Down-regulated |
| NM_001085460 | CTNND1   | 1500   | 14.7364 | 12.2993 | 9.7511  | 9.92677 | -0.4088 | 0.000255 | 0.0054437 | Down-regulated |



## TGFβ1 induces cisplatin resistance of NSCLC by G6PD

|              |          |        |         |         |         |         |         |          |           |                |
|--------------|----------|--------|---------|---------|---------|---------|---------|----------|-----------|----------------|
| NM_130854    | PTPRS    | 5802   | 23.2151 | 21.5975 | 15.8456 | 17.2114 | -0.4085 | 5.39E-07 | 3.72E-05  | Down-regulated |
| NM_014216    | ITPK1    | 3705   | 69.5498 | 60.1551 | 45.3397 | 49.7229 | -0.4083 | 1.60E-05 | 0.0006309 | Down-regulated |
| NM_174983    | MFSD12   | 126321 | 40.1968 | 30.8229 | 24.7447 | 26.0793 | -0.407  | 0.002703 | 0.0311758 | Down-regulated |
| NM_004954    | MARK2    | 2011   | 11.3909 | 11.1027 | 7.95234 | 8.50499 | -0.4067 | 9.54E-05 | 0.0025235 | Down-regulated |
| NM_019015    | CHPF2    | 54480  | 33.7514 | 26.333  | 21.9626 | 21.5421 | -0.4057 | 0.000994 | 0.0153233 | Down-regulated |
| NM_015048    | SETD1B   | 23067  | 7.33529 | 6.26429 | 4.82537 | 5.0863  | -0.405  | 0.000515 | 0.0093386 | Down-regulated |
| NM_201446    | EGFL7    | 51162  | 105.853 | 79.1195 | 64.2554 | 67.8721 | -0.4039 | 0.002804 | 0.0320368 | Down-regulated |
| NM_024496    | IRF2BPL  | 64207  | 33.0879 | 25.3953 | 20.5511 | 21.7344 | -0.4038 | 0.001608 | 0.0217415 | Down-regulated |
| NM_178820    | FBXO27   | 126433 | 12.8078 | 11.4515 | 8.05088 | 9.23809 | -0.4036 | 0.00482  | 0.0468785 | Down-regulated |
| NM_001012761 | RGMB     | 285704 | 6.83492 | 7.86267 | 5.41237 | 5.20475 | -0.4013 | 0.002905 | 0.0326965 | Down-regulated |
| NM_012155    | EML2     | 24139  | 21.5393 | 17.9531 | 15.0128 | 13.4043 | -0.4004 | 0.002963 | 0.0330204 | Down-regulated |
| NM_001130144 | LTBP3    | 4054   | 98.8077 | 76.8681 | 61.9497 | 66.6295 | -0.3998 | 0.00039  | 0.0074975 | Down-regulated |
| NM_004706    | ARHGEF1  | 9138   | 39.3174 | 31.7963 | 23.8123 | 27.7815 | -0.3994 | 0.001683 | 0.0224839 | Down-regulated |
| NM_032575    | GLIS2    | 84662  | 33.7961 | 27.0785 | 20.4042 | 23.7492 | -0.3992 | 0.00192  | 0.0245376 | Down-regulated |
| NM_001025434 | NQO1     | 1728   | 13.9184 | 14.0028 | 9.92052 | 10.4085 | -0.3991 | 0.000979 | 0.0151799 | Down-regulated |
| NM_030930    | UNC93B1  | 81622  | 65.6084 | 49.1539 | 40.5009 | 42.3697 | -0.399  | 0.002584 | 0.0303289 | Down-regulated |
| NM_001012614 | CTBP1    | 1487   | 65.0335 | 53.5945 | 41.7487 | 45.1166 | -0.3986 | 0.000288 | 0.0059803 | Down-regulated |
| NM_004451    | ESRRA    | 2101   | 19.5871 | 16.8099 | 11.8981 | 14.2524 | -0.3982 | 0.0047   | 0.0461632 | Down-regulated |
| NM_006005    | WFS1     | 7466   | 8.9358  | 9.4652  | 5.98652 | 7.26881 | -0.398  | 0.005042 | 0.0485793 | Down-regulated |
| NM_019112    | ABCA7    | 10347  | 7.26334 | 6.37561 | 5.07566 | 4.91718 | -0.3978 | 0.000585 | 0.010403  | Down-regulated |
| NM_138368    | AP5B1    | 91056  | 14.2604 | 10.5154 | 8.72255 | 9.11394 | -0.3973 | 0.005043 | 0.0485793 | Down-regulated |
| NM_014567    | BCAR1    | 9564   | 88.5428 | 66.2418 | 50.8522 | 60.899  | -0.397  | 0.003652 | 0.0385267 | Down-regulated |
| NM_198291    | SRC      | 6714   | 17.9978 | 15.5564 | 11.8151 | 12.8166 | -0.3968 | 0.000422 | 0.0079677 | Down-regulated |
| NM_001164446 | C6orf132 | 647024 | 14.3952 | 11.5263 | 8.65728 | 10.1489 | -0.3967 | 0.002844 | 0.0323614 | Down-regulated |
| NM_178167    | ZNF598   | 90850  | 41.1895 | 30.8362 | 24.4083 | 27.5533 | -0.3967 | 0.004103 | 0.0419101 | Down-regulated |
| NM_001199698 | BAG6     | 7917   | 29.9088 | 29.3909 | 21.8383 | 22.2899 | -0.396  | 3.44E-07 | 2.57E-05  | Down-regulated |
| NM_014786    | ARHGEF17 | 9828   | 32.4391 | 25.1718 | 19.963  | 22.1666 | -0.3958 | 0.001121 | 0.0166712 | Down-regulated |
| NM_022450    | RHBDF1   | 64285  | 28.2588 | 22.1251 | 17.4249 | 19.086  | -0.3953 | 0.00292  | 0.0327747 | Down-regulated |
| NM_030783    | PTDSS2   | 81490  | 20.1767 | 18.0714 | 13.6318 | 14.4013 | -0.395  | 0.000597 | 0.0105288 | Down-regulated |
| NM_001322841 | ABR      | 29     | 38.0298 | 32.4427 | 23.5407 | 28.2451 | -0.3947 | 0.000558 | 0.010015  | Down-regulated |
| NM_000693    | ALDH1A3  | 220    | 1441.27 | 1445.95 | 1080.58 | 1087.9  | -0.3944 | 3.30E-27 | 3.29E-24  | Down-regulated |
| NM_021005    | NR2F2    | 7026   | 35.413  | 34.1766 | 23.8287 | 27.7798 | -0.394  | 3.30E-05 | 0.0011369 | Down-regulated |
| NM_018639    | WSB2     | 55884  | 35.1144 | 34.4895 | 25.6098 | 26.1597 | -0.3939 | 8.88E-07 | 5.73E-05  | Down-regulated |
| NM_014643    | ZNF516   | 9658   | 5.163   | 4.93053 | 3.58618 | 3.86895 | -0.3918 | 0.00039  | 0.0074975 | Down-regulated |
| NM_001318734 | KLC2     | 64837  | 12.2626 | 11.3453 | 8.22267 | 9.03939 | -0.3904 | 0.00189  | 0.0243314 | Down-regulated |
| NM_001256183 | ANKRD11  | 29123  | 17.1046 | 14.5951 | 11.6094 | 11.9626 | -0.39   | 5.25E-05 | 0.0015894 | Down-regulated |
| NM_005115    | MVP      | 9961   | 112.862 | 96.6982 | 74.2558 | 81.488  | -0.3889 | 3.10E-05 | 0.0010865 | Down-regulated |
| NM_138420    | AHNAK2   | 113146 | 6.25057 | 6.04919 | 4.7985  | 4.39752 | -0.3889 | 6.39E-06 | 0.0002911 | Down-regulated |
| NM_000202    | IDS      | 3423   | 6.22364 | 6.91825 | 5.12127 | 4.5553  | -0.3877 | 0.001623 | 0.0218997 | Down-regulated |
| NM_012121    | CDC42EP4 | 23580  | 50.5854 | 38.2043 | 32.3767 | 32.5401 | -0.3875 | 0.002689 | 0.0311153 | Down-regulated |
| NM_017546    | CNOT11   | 55571  | 42.7413 | 38.1157 | 29.0139 | 31.0771 | -0.3865 | 6.51E-05 | 0.0018612 | Down-regulated |
| NM_001001852 | PIM3     | 415116 | 37.9747 | 30.0563 | 23.6743 | 26.0282 | -0.3862 | 0.002971 | 0.0330514 | Down-regulated |
| NM_002052    | GATA4    | 2626   | 10.6952 | 9.94621 | 6.97289 | 8.14043 | -0.3853 | 0.003501 | 0.0374661 | Down-regulated |
| NM_053056    | CNND1    | 595    | 123.612 | 124.55  | 92.0089 | 95.2979 | -0.3852 | 2.79E-14 | 9.56E-12  | Down-regulated |
| NM_001136044 | TMUB1    | 83590  | 69.8788 | 57.4958 | 42.2871 | 50.2951 | -0.3848 | 0.003742 | 0.0392064 | Down-regulated |
| NM_012292    | ARHGAP45 | 23526  | 42.4654 | 34.801  | 27.6365 | 29.7868 | -0.3841 | 0.00029  | 0.0060045 | Down-regulated |
| NM_006482    | DYRK2    | 8445   | 5.06747 | 4.36834 | 3.52433 | 3.36551 | -0.384  | 0.004855 | 0.0471378 | Down-regulated |
| NM_012288    | TRAM2    | 9697   | 23.8388 | 26.0951 | 19.0094 | 18.4679 | -0.3839 | 4.90E-06 | 0.0002394 | Down-regulated |
| NM_001014447 | CPZ      | 8532   | 15.0324 | 14.1421 | 10.2918 | 11.0902 | -0.3839 | 0.002307 | 0.0280884 | Down-regulated |
| NM_002608    | PDGFB    | 5155   | 10.5352 | 9.57837 | 6.9619  | 7.84503 | -0.3838 | 0.002319 | 0.02814   | Down-regulated |
| NM_013403    | STRN4    | 29888  | 38.7366 | 30.8198 | 24.4997 | 26.7159 | -0.3834 | 0.001819 | 0.0237779 | Down-regulated |
| NM_001198801 | EIF4G3   | 8672   | 10.1063 | 8.6877  | 7.48485 | 6.3536  | -0.3825 | 0.00285  | 0.0323689 | Down-regulated |
| NM_014856    | DENND4B  | 9909   | 10.421  | 9.16715 | 6.85758 | 7.65977 | -0.3822 | 0.001101 | 0.0164902 | Down-regulated |
| NM_001039673 | YIF1B    | 90522  | 13.0126 | 11.4942 | 8.4721  | 9.4829  | -0.382  | 0.004271 | 0.043239  | Down-regulated |
| NM_002081    | GPC1     | 2817   | 90.1043 | 73.4369 | 58.9516 | 62.8448 | -0.382  | 0.000202 | 0.0045439 | Down-regulated |
| NM_006795    | EHD1     | 10938  | 174.829 | 156.263 | 122.168 | 127.284 | -0.3812 | 3.03E-08 | 3.20E-06  | Down-regulated |
| NM_079834    | SCAMP4   | 113178 | 37.2763 | 31.833  | 25.5584 | 25.8611 | -0.381  | 0.00026  | 0.0055419 | Down-regulated |

## TGFβ1 induces cisplatin resistance of NSCLC by G6PD

|              |          |        |         |         |         |         |         |          |           |                |
|--------------|----------|--------|---------|---------|---------|---------|---------|----------|-----------|----------------|
| NM_016368    | ISYNA1   | 51477  | 154.943 | 117.755 | 95.3132 | 105.617 | -0.3809 | 0.001898 | 0.0243823 | Down-regulated |
| NM_024682    | TBC1D17  | 79735  | 23.7486 | 20.112  | 16.6317 | 15.7351 | -0.3798 | 0.001842 | 0.0238361 | Down-regulated |
| NM_001959    | EEF1B2   | 1933   | 36.2922 | 34.2294 | 26.5974 | 25.1838 | -0.3782 | 0.002176 | 0.0268446 | Down-regulated |
| NM_018955    | UBB      | 7314   | 932.885 | 854.999 | 616.593 | 719.076 | -0.3774 | 1.17E-05 | 0.0004835 | Down-regulated |
| NM_001098424 | DLG1     | 1739   | 14.8079 | 12.6603 | 10.9683 | 9.33936 | -0.3772 | 0.002894 | 0.0326416 | Down-regulated |
| NM_015177    | DTX4     | 23220  | 12.9706 | 11.1757 | 9.05193 | 8.97605 | -0.3771 | 0.000447 | 0.0082898 | Down-regulated |
| NM_002419    | MAP3K11  | 4296   | 33.0848 | 26.4651 | 21.0772 | 23.0428 | -0.3761 | 0.002158 | 0.0267059 | Down-regulated |
| NM_012478    | WBP2     | 23558  | 108.996 | 95.6984 | 73.6892 | 79.7479 | -0.3757 | 3.33E-05 | 0.0011423 | Down-regulated |
| NM_002659    | PLAUR    | 5329   | 55.5411 | 57.6033 | 43.6323 | 41.0421 | -0.3755 | 6.87E-05 | 0.0019442 | Down-regulated |
| NM_001193524 | FAM65A   | 79567  | 37.4035 | 36.2641 | 23.7005 | 30.8636 | -0.3755 | 0.002895 | 0.0326416 | Down-regulated |
| NM_182943    | PLOD2    | 5352   | 93.8106 | 104.852 | 74.6849 | 75.4065 | -0.3752 | 2.35E-06 | 0.0001306 | Down-regulated |
| NM_017999    | RNF31    | 55072  | 22.7074 | 19.0692 | 14.8309 | 16.2502 | -0.3746 | 0.001455 | 0.0201547 | Down-regulated |
| NM_000602    | SERPINE1 | 5054   | 901.241 | 1008.37 | 736.936 | 707.622 | -0.3746 | 4.24E-07 | 3.01E-05  | Down-regulated |
| NM_031459    | SESN2    | 83667  | 31.8755 | 26.4114 | 21.4753 | 22.0488 | -0.3745 | 0.000673 | 0.0115432 | Down-regulated |
| NM_006455    | P3H4     | 10609  | 18.0263 | 16.1477 | 13.0173 | 12.4419 | -0.3731 | 0.001319 | 0.0188591 | Down-regulated |
| NM_024832    | RIN3     | 79890  | 15.8607 | 14.8682 | 10.6132 | 12.3356 | -0.3718 | 0.001262 | 0.0182343 | Down-regulated |
| NM_001080453 | INTS1    | 26173  | 80.5864 | 57.4495 | 49.5025 | 52.7022 | -0.3712 | 0.004764 | 0.0466291 | Down-regulated |
| NM_003330    | TXNRD1   | 7296   | 105.877 | 108.663 | 80.0507 | 83.343  | -0.3709 | 5.76E-11 | 1.22E-08  | Down-regulated |
| NM_022767    | AEN      | 64782  | 36.6395 | 31.9592 | 26.1438 | 25.5096 | -0.3701 | 0.00013  | 0.0031996 | Down-regulated |
| NM_031450    | C11orf68 | 83638  | 40.9078 | 35.332  | 27.5411 | 29.232  | -0.3687 | 0.001479 | 0.0204019 | Down-regulated |
| NM_182838    | SLC35E2  | 9906   | 12.3219 | 11.7764 | 9.27502 | 8.98583 | -0.3675 | 3.30E-05 | 0.0011369 | Down-regulated |
| NM_020338    | ZMIZ1    | 57178  | 21.2258 | 21.5589 | 16.632  | 15.9682 | -0.3672 | 2.35E-07 | 1.87E-05  | Down-regulated |
| NM_001321463 | NCLN     | 56926  | 20.7378 | 16.7269 | 14.4586 | 13.433  | -0.3667 | 0.003686 | 0.0387662 | Down-regulated |
| NR_033403    | BMP1     | 649    | 10.6354 | 9.64623 | 7.92972 | 7.2118  | -0.3663 | 0.002802 | 0.0320368 | Down-regulated |
| NM_005257    | GATA6    | 2627   | 70.6386 | 59.2467 | 47.0177 | 50.991  | -0.3663 | 0.00022  | 0.0048307 | Down-regulated |
| NM_030665    | RAI1     | 10743  | 35.7358 | 28.1617 | 22.1981 | 25.6093 | -0.3661 | 0.002585 | 0.0303289 | Down-regulated |
| NM_001330520 | TNRC6A   | 27327  | 10.174  | 10.9045 | 7.9471  | 8.05545 | -0.3655 | 6.13E-05 | 0.0017664 | Down-regulated |
| NM_006039    | MRC2     | 9902   | 79.0541 | 65.2349 | 53.9438 | 55.3682 | -0.365  | 9.79E-05 | 0.0025732 | Down-regulated |
| NM_145109    | MAP2K3   | 5606   | 36.5507 | 36.5295 | 27.1155 | 28.2886 | -0.3646 | 3.00E-05 | 0.001066  | Down-regulated |
| NM_001195733 | PIP5K1C  | 23396  | 7.22322 | 6.3096  | 4.92039 | 5.17112 | -0.3641 | 0.004482 | 0.0446011 | Down-regulated |
| NM_033238    | PML      | 5371   | 6.50588 | 6.26339 | 4.5358  | 5.03617 | -0.364  | 0.002733 | 0.0313927 | Down-regulated |
| NM_004560    | ROR2     | 4920   | 12.5042 | 11.216  | 8.96759 | 8.90767 | -0.3631 | 0.000954 | 0.0149462 | Down-regulated |
| NM_002428    | MMP15    | 4324   | 43.7282 | 34.708  | 27.9008 | 30.9165 | -0.3629 | 0.002381 | 0.0286702 | Down-regulated |
| NM_032804    | ADO      | 84890  | 15.4215 | 12.4511 | 10.495  | 10.2832 | -0.3626 | 0.00513  | 0.049067  | Down-regulated |
| NM_202468    | GIPC1    | 10755  | 63.9369 | 65.1636 | 48.3044 | 49.8585 | -0.3617 | 5.08E-06 | 0.0002435 | Down-regulated |
| NM_078480    | PUF60    | 22827  | 23.2978 | 24.0548 | 18.2781 | 17.3554 | -0.3603 | 0.001293 | 0.0185541 | Down-regulated |
| NM_015627    | LDLRAP1  | 26119  | 13.8476 | 12.4338 | 9.73773 | 9.99797 | -0.3601 | 0.002573 | 0.0303289 | Down-regulated |
| NM_002480    | PPP1R12A | 4659   | 13.2448 | 13.2957 | 10.222  | 10.0117 | -0.36   | 3.65E-05 | 0.0012059 | Down-regulated |
| NM_001170718 | BCAR1    | 9564   | 42.9912 | 37.9229 | 30.2706 | 31.288  | -0.3593 | 6.62E-05 | 0.0018834 | Down-regulated |
| NM_006598    | SLC12A7  | 10723  | 18.1895 | 15.4048 | 12.5159 | 12.922  | -0.3586 | 0.000808 | 0.0131375 | Down-regulated |
| NM_030775    | WNT5B    | 81029  | 36.1327 | 29.6819 | 25.2306 | 24.18   | -0.3579 | 0.002937 | 0.0329128 | Down-regulated |
| NM_003900    | SQSTM1   | 8878   | 1288.93 | 1182.95 | 954.066 | 944.835 | -0.3576 | 5.43E-12 | 1.33E-09  | Down-regulated |
| NM_002403    | MFAP2    | 4237   | 81.1977 | 68.8862 | 56.9533 | 55.57   | -0.3572 | 0.001278 | 0.0183619 | Down-regulated |
| NM_004995    | MMP14    | 4323   | 58.7411 | 52.2931 | 42.1617 | 42.7511 | -0.3567 | 7.63E-06 | 0.0003326 | Down-regulated |
| NM_001127173 | CADM3    | 57863  | 51.4179 | 46.4272 | 37.5251 | 37.3693 | -0.3564 | 3.56E-06 | 0.0001851 | Down-regulated |
| NM_004712    | HGS      | 9146   | 103.213 | 80.6598 | 65.5039 | 73.0127 | -0.3563 | 0.002615 | 0.0306007 | Down-regulated |
| NM_004756    | NUMBL    | 9253   | 14.7318 | 12.3265 | 10.2784 | 10.0656 | -0.356  | 0.004    | 0.041163  | Down-regulated |
| NM_001425    | EMP3     | 2014   | 241.233 | 205.544 | 160.087 | 174.654 | -0.3559 | 0.000483 | 0.0088283 | Down-regulated |
| NM_024417    | FDXR     | 2232   | 102.176 | 81.0079 | 69.2502 | 68.7392 | -0.3559 | 0.001818 | 0.0237779 | Down-regulated |
| NM_001013251 | SLC3A2   | 6520   | 277.466 | 252.879 | 198.257 | 207.851 | -0.3558 | 4.78E-08 | 4.60E-06  | Down-regulated |
| NM_177939    | P4HTM    | 54681  | 55.2134 | 46.9348 | 38.4541 | 39.0124 | -0.3549 | 0.000564 | 0.0100928 | Down-regulated |
| NM_138795    | ARL8A    | 127829 | 30.5391 | 29.1307 | 23.709  | 21.4077 | -0.354  | 0.001439 | 0.0199721 | Down-regulated |
| NM_002521    | NPPB     | 4879   | 1160.01 | 1039.08 | 816.953 | 843.4   | -0.354  | 3.99E-08 | 3.99E-06  | Down-regulated |
| NM_003153    | STAT6    | 6778   | 49.4652 | 41.0805 | 34.56   | 34.3861 | -0.3535 | 0.000435 | 0.0081149 | Down-regulated |
| NM_001143963 | L1CAM    | 3897   | 37.3334 | 30.9424 | 27.2799 | 24.6146 | -0.3519 | 0.001338 | 0.0190322 | Down-regulated |
| NM_130445    | COL18A1  | 80781  | 118.965 | 98.8831 | 81.0436 | 85.7577 | -0.3513 | 0.00012  | 0.0030147 | Down-regulated |
| NM_018071    | ARHGEF40 | 55701  | 7.96136 | 7.06532 | 5.51248 | 5.88485 | -0.3512 | 0.002549 | 0.0301679 | Down-regulated |

## TGFβ1 induces cisplatin resistance of NSCLC by G6PD

|              |          |        |         |         |         |         |         |          |           |                |
|--------------|----------|--------|---------|---------|---------|---------|---------|----------|-----------|----------------|
| NM_001301076 | AP2S1    | 1175   | 69.6743 | 76.5359 | 52.2007 | 57.2323 | -0.3499 | 0.003936 | 0.0406935 | Down-regulated |
| NM_001177355 | MSLN     | 10232  | 76.7763 | 65.318  | 51.0881 | 56.9522 | -0.3493 | 0.001013 | 0.0154863 | Down-regulated |
| NM_153265    | EML3     | 256364 | 28.5704 | 23.5505 | 18.5327 | 20.8919 | -0.3487 | 0.004476 | 0.0446011 | Down-regulated |
| NM_001010972 | ZYX      | 7791   | 138.605 | 127.98  | 95.4128 | 109.046 | -0.3476 | 6.90E-05 | 0.0019442 | Down-regulated |
| NM_005186    | CAPN1    | 823    | 96.2843 | 82.5297 | 65.9896 | 71.1052 | -0.3476 | 0.000146 | 0.0035063 | Down-regulated |
| NM_000581    | GPX1     | 2876   | 554.172 | 457.243 | 374.428 | 395.684 | -0.3462 | 0.0002   | 0.0045233 | Down-regulated |
| NM_003482    | KMT2D    | 8085   | 10.3677 | 9.6641  | 7.75819 | 7.75859 | -0.346  | 3.03E-07 | 2.34E-05  | Down-regulated |
| NM_006949    | STXB2    | 6813   | 99.9318 | 83.2467 | 68.381  | 71.4033 | -0.3456 | 0.0007   | 0.0118952 | Down-regulated |
| NM_001289984 | JADE2    | 23338  | 9.93445 | 11.2164 | 8.58813 | 7.52633 | -0.3444 | 0.00414  | 0.0421349 | Down-regulated |
| NM_002886    | RAP2B    | 5912   | 8.5703  | 8.24494 | 6.14619 | 6.7879  | -0.3441 | 0.000454 | 0.0084147 | Down-regulated |
| NM_006317    | BASP1    | 10409  | 238.755 | 217.608 | 175.305 | 177.251 | -0.3439 | 5.02E-08 | 4.80E-06  | Down-regulated |
| NM_005597    | NFIC     | 4782   | 13.0966 | 14.9523 | 10.1708 | 11.3216 | -0.3434 | 0.001794 | 0.0235868 | Down-regulated |
| NM_001098833 | ATXN7L3  | 56970  | 20.9292 | 18.502  | 14.464  | 15.7056 | -0.3434 | 0.001327 | 0.01894   | Down-regulated |
| NM_001017987 | MRNIP    | 51149  | 120.66  | 122.294 | 96.3272 | 89.3489 | -0.3429 | 8.87E-05 | 0.002377  | Down-regulated |
| NM_001080826 | SGK223   | 157285 | 12.5412 | 10.8879 | 8.58309 | 9.30593 | -0.3425 | 0.003058 | 0.0337563 | Down-regulated |
| NM_153271    | SNX33    | 257364 | 33.8992 | 31.1668 | 25.9389 | 24.1922 | -0.342  | 0.000157 | 0.0037158 | Down-regulated |
| NM_016352    | CPA4     | 51200  | 384.532 | 392.877 | 303.405 | 301.399 | -0.3414 | 5.25E-14 | 1.69E-11  | Down-regulated |
| NM_002579    | PALM     | 5064   | 16.2361 | 15.4912 | 11.6391 | 12.6399 | -0.3405 | 0.002199 | 0.0271041 | Down-regulated |
| NM_153828    | RTN4     | 57142  | 600.162 | 538.833 | 434.944 | 448.459 | -0.3404 | 3.87E-08 | 3.90E-06  | Down-regulated |
| NM_005082    | TRIM25   | 7706   | 42.4346 | 43.4016 | 33.1827 | 33.6248 | -0.3399 | 2.17E-08 | 2.33E-06  | Down-regulated |
| NM_001940    | ATN1     | 1822   | 48.162  | 41.6219 | 33.3971 | 35.89   | -0.3395 | 0.000255 | 0.0054437 | Down-regulated |
| NM_173689    | CRB2     | 286204 | 50.873  | 43.4017 | 33.7737 | 38.9013 | -0.3368 | 0.001165 | 0.0171747 | Down-regulated |
| NM_001127392 | MYRF     | 745    | 133.81  | 120.089 | 97.5288 | 100.365 | -0.3365 | 1.97E-07 | 1.59E-05  | Down-regulated |
| NM_024698    | SLC25A22 | 79751  | 31.217  | 26.2983 | 22.1498 | 22.0428 | -0.3353 | 0.002325 | 0.0281751 | Down-regulated |
| NM_001289823 | FURIN    | 5045   | 43.5994 | 38.7872 | 30.7437 | 33.1488 | -0.335  | 0.000139 | 0.0033958 | Down-regulated |
| NM_053279    | FAM167A  | 83648  | 31.01   | 27.8004 | 22.9623 | 22.6633 | -0.3346 | 0.000114 | 0.002913  | Down-regulated |
| NM_002826    | QSOX1    | 5768   | 212.264 | 181.006 | 153.635 | 151.812 | -0.3342 | 3.41E-05 | 0.0011591 | Down-regulated |
| NM_015894    | STMN3    | 50861  | 104.83  | 86.4818 | 68.2593 | 78.6058 | -0.3341 | 0.002952 | 0.0329444 | Down-regulated |
| NM_015472    | WWTR1    | 25937  | 10.7522 | 10.6846 | 8.09395 | 8.49578 | -0.334  | 0.000712 | 0.0119938 | Down-regulated |
| NM_014045    | LRP10    | 26020  | 60.6083 | 52.8286 | 44.0215 | 44.3197 | -0.3339 | 1.64E-05 | 0.0006379 | Down-regulated |
| NM_020378    | NAT14    | 57106  | 96.7848 | 81.6732 | 67.2456 | 69.6428 | -0.3339 | 0.001374 | 0.0193915 | Down-regulated |
| NM_020898    | CALCOCO1 | 57658  | 31.1503 | 28.6566 | 22.8493 | 23.5172 | -0.3337 | 0.000164 | 0.0038649 | Down-regulated |
| NM_004417    | DUSP1    | 1843   | 403.367 | 354.984 | 284.089 | 304.894 | -0.3331 | 1.05E-05 | 0.0004429 | Down-regulated |
| NM_003687    | PDLIM4   | 8572   | 90.2106 | 71.1737 | 60.8244 | 62.9861 | -0.3328 | 0.003764 | 0.0392934 | Down-regulated |
| NM_032960    | MAPKAPK2 | 9261   | 24.8027 | 24.0409 | 18.7025 | 19.1918 | -0.3324 | 0.000198 | 0.0045056 | Down-regulated |
| NM_080388    | S100A16  | 140576 | 255.591 | 238.563 | 193.997 | 189.423 | -0.3322 | 1.52E-07 | 1.27E-05  | Down-regulated |
| NM_001846    | COL4A2   | 1284   | 192.959 | 186.678 | 145.803 | 152.057 | -0.3321 | 2.01E-13 | 5.97E-11  | Down-regulated |
| NM_003898    | SYNJ2    | 8871   | 8.23508 | 8.54739 | 6.87576 | 6.09768 | -0.3313 | 0.002318 | 0.02814   | Down-regulated |
| NM_001042545 | LTBP4    | 8425   | 14.301  | 12.6969 | 10.6537 | 10.2932 | -0.3281 | 0.001438 | 0.0199721 | Down-regulated |
| NM_001183    | ATP6AP1  | 537    | 123.844 | 106.569 | 88.0024 | 91.2189 | -0.3268 | 0.000201 | 0.0045323 | Down-regulated |
| NM_014727    | KMT2B    | 9757   | 9.77203 | 8.62438 | 6.90255 | 7.41258 | -0.3251 | 0.001582 | 0.0214484 | Down-regulated |
| NM_000101    | CYBA     | 1535   | 1003.6  | 781.643 | 644.038 | 714.767 | -0.3236 | 0.003858 | 0.0399605 | Down-regulated |
| NM_014516    | CNOT3    | 4849   | 33.7605 | 30.2748 | 24.1161 | 25.7853 | -0.3231 | 0.000824 | 0.0133239 | Down-regulated |
| NM_019058    | DDIT4    | 54541  | 143.91  | 120.202 | 100.413 | 105.063 | -0.321  | 0.000999 | 0.0153666 | Down-regulated |
| NM_005729    | PIIF     | 10105  | 88.3842 | 94.9678 | 71.4807 | 72.3072 | -0.321  | 3.45E-05 | 0.0011652 | Down-regulated |
| NM_024598    | USB1     | 79650  | 22.2681 | 20.9018 | 17.524  | 15.9574 | -0.3202 | 0.004275 | 0.043239  | Down-regulated |
| NM_024321    | RBM42    | 79171  | 84.9345 | 73.7427 | 61.2541 | 62.4212 | -0.32   | 0.000615 | 0.0107642 | Down-regulated |
| NM_002705    | PPL      | 5493   | 52.2291 | 52.931  | 39.8963 | 43.081  | -0.3198 | 1.21E-06 | 7.57E-05  | Down-regulated |
| NM_001099409 | EHBP1L1  | 254102 | 28.688  | 25.6497 | 20.6428 | 21.9832 | -0.3197 | 0.000284 | 0.0059152 | Down-regulated |
| NM_014030    | GIT1     | 28964  | 35.2851 | 30.9528 | 25.889  | 26.0021 | -0.3189 | 0.000476 | 0.0087207 | Down-regulated |
| NM_003370    | VASP     | 7408   | 50.4264 | 42.4477 | 34.9036 | 37.3274 | -0.3186 | 0.003305 | 0.0358664 | Down-regulated |
| NM_021035    | ZNF1     | 57169  | 15.8468 | 18.1854 | 13.6919 | 12.9399 | -0.3184 | 0.002116 | 0.0262791 | Down-regulated |
| NM_006029    | PNMA1    | 9240   | 71.7446 | 64.7113 | 53.7375 | 53.5147 | -0.318  | 4.21E-05 | 0.0013395 | Down-regulated |
| NM_018426    | TMEM63B  | 55362  | 24.9318 | 22.227  | 18.2082 | 18.705  | -0.3169 | 0.001233 | 0.0179625 | Down-regulated |
| NM_006096    | NDRG1    | 10397  | 59.6719 | 58.0538 | 45.724  | 47.1887 | -0.3166 | 1.48E-06 | 8.56E-05  | Down-regulated |
| NM_020746    | MAVS     | 57506  | 8.25007 | 7.51693 | 6.53684 | 5.82433 | -0.3161 | 0.001936 | 0.0246381 | Down-regulated |
| NM_005819    | STX6     | 10228  | 8.57882 | 8.18542 | 6.56344 | 6.56463 | -0.3141 | 0.003334 | 0.0361037 | Down-regulated |
| NM_002821    | PTK7     | 5754   | 27.8705 | 28.7056 | 21.6933 | 22.9593 | -0.3136 | 0.000105 | 0.002723  | Down-regulated |

## TGFβ1 induces cisplatin resistance of NSCLC by G6PD

|              |          |        |         |         |         |         |         |          |           |                |
|--------------|----------|--------|---------|---------|---------|---------|---------|----------|-----------|----------------|
| NM_153827    | MINK1    | 50488  | 29.0403 | 23.741  | 20.9246 | 20.3612 | -0.3136 | 0.004177 | 0.0424718 | Down-regulated |
| NM_000637    | GSR      | 2936   | 46.7964 | 49.643  | 38.567  | 37.5533 | -0.3135 | 7.58E-05 | 0.0020923 | Down-regulated |
| NM_001303614 | SAMD4B   | 55095  | 13.5686 | 12.8807 | 10.0747 | 10.6476 | -0.3132 | 0.003377 | 0.0364205 | Down-regulated |
| NM_015318    | ARHGEF18 | 23370  | 20.812  | 17.3945 | 14.6158 | 15.3006 | -0.3129 | 0.004004 | 0.0411719 | Down-regulated |
| NM_002335    | LRP5     | 4041   | 23.0398 | 19.4773 | 16.0457 | 17.2787 | -0.3123 | 0.003468 | 0.0371927 | Down-regulated |
| NM_023106    | FGFR1    | 2260   | 28.3286 | 27.3246 | 21.8392 | 22.2844 | -0.3119 | 3.96E-06 | 0.0002031 | Down-regulated |
| NM_005990    | STK10    | 6793   | 17.4138 | 15.5137 | 13.1553 | 12.8084 | -0.3116 | 0.000736 | 0.0122899 | Down-regulated |
| NM_018067    | MAP7D1   | 55700  | 21.8854 | 18.7939 | 16.4151 | 15.4505 | -0.3112 | 0.004699 | 0.0461632 | Down-regulated |
| NM_006698    | BLCAP    | 10904  | 50.9477 | 50.4579 | 40.0868 | 39.9181 | -0.3111 | 7.89E-05 | 0.0021594 | Down-regulated |
| NM_002631    | PGD      | 5226   | 112.009 | 112.185 | 88.5828 | 89.2676 | -0.31   | 8.45E-08 | 7.80E-06  | Down-regulated |
| NM_006470    | TRIM16   | 10626  | 32.7284 | 35.2707 | 27.4481 | 26.182  | -0.3088 | 0.00097  | 0.0150813 | Down-regulated |
| NM_022060    | ABHD4    | 63874  | 35.9009 | 34.8692 | 27.2447 | 28.6727 | -0.3084 | 0.000334 | 0.006735  | Down-regulated |
| NM_024519    | FAM65A   | 79567  | 78.3914 | 69.6237 | 59.3603 | 58.0765 | -0.3075 | 4.12E-05 | 0.0013178 | Down-regulated |
| NM_003969    | UBE2M    | 9040   | 154.123 | 124.907 | 109.113 | 109.432 | -0.3063 | 0.003651 | 0.0385267 | Down-regulated |
| NM_138761    | BAX      | 581    | 190.824 | 181.662 | 142.634 | 148.824 | -0.3061 | 0.000123 | 0.0030921 | Down-regulated |
| NM_182683    | UPK3B    | 80761  | 252.805 | 208.491 | 185.665 | 176.67  | -0.3056 | 0.001702 | 0.0226488 | Down-regulated |
| NM_001122681 | SH3BP2   | 6452   | 6.2671  | 5.66679 | 4.66483 | 4.76032 | -0.3053 | 0.003272 | 0.0356443 | Down-regulated |
| NM_021173    | POLD4    | 57804  | 37.5478 | 34.366  | 28.6088 | 27.9643 | -0.3042 | 0.002588 | 0.0303321 | Down-regulated |
| NM_017556    | FBLIM1   | 54751  | 70.6114 | 68.7304 | 53.9718 | 57.0726 | -0.304  | 2.65E-06 | 0.0001436 | Down-regulated |
| NM_002309    | LIF      | 3976   | 50.3477 | 42.0134 | 36.4757 | 36.5102 | -0.3039 | 0.002074 | 0.0259044 | Down-regulated |
| NM_014654    | SDC3     | 9672   | 10.9522 | 10.4448 | 8.42586 | 8.51576 | -0.3037 | 0.001828 | 0.0238073 | Down-regulated |
| NM_000528    | MAN2B1   | 4125   | 95.0488 | 83.7321 | 70.3349 | 71.7186 | -0.3037 | 9.24E-05 | 0.0024583 | Down-regulated |
| NM_032989    | BAD      | 572    | 116.895 | 101.25  | 84.8705 | 85.8408 | -0.3028 | 0.002541 | 0.0301365 | Down-regulated |
| NR_046235    | RNA45S5  | 1E+08  | 858.591 | 1022.72 | 689.845 | 799.617 | -0.3026 | 0.004436 | 0.0444425 | Down-regulated |
| NM_003954    | MAP3K14  | 9020   | 20.9667 | 19.5416 | 15.4546 | 16.6873 | -0.302  | 0.00094  | 0.014762  | Down-regulated |
| NM_033386    | MICALL1  | 85377  | 31.0073 | 28.0897 | 22.6442 | 24.3412 | -0.301  | 0.000595 | 0.0105059 | Down-regulated |
| NM_001320034 | GRAMD1A  | 57655  | 33.9125 | 34.5435 | 26.8017 | 27.6217 | -0.3006 | 0.000385 | 0.0074426 | Down-regulated |
| NM_080686    | PRRC2A   | 7916   | 41.092  | 36.7256 | 30.5586 | 31.5528 | -0.3006 | 5.97E-05 | 0.0017383 | Down-regulated |
| NM_175866    | UHMK1    | 127933 | 18.3765 | 20.5162 | 15.5017 | 15.4869 | -0.2999 | 0.000713 | 0.0119938 | Down-regulated |
| NM_012401    | PLXNB2   | 23654  | 132.257 | 117.612 | 97.4171 | 102.422 | -0.2991 | 1.68E-05 | 0.0006476 | Down-regulated |
| NM_017758    | ALKBH5   | 54890  | 26.998  | 23.6285 | 20.0492 | 20.1187 | -0.2983 | 0.00253  | 0.0300364 | Down-regulated |
| NM_018677    | ACSS2    | 55902  | 21.8233 | 21.4773 | 17.5697 | 16.8473 | -0.2976 | 0.001547 | 0.0210744 | Down-regulated |
| NM_016201    | AMOTL2   | 51421  | 73.1166 | 69.8158 | 55.0498 | 59.4912 | -0.2972 | 5.41E-06 | 0.000256  | Down-regulated |
| NM_003118    | SPARC    | 6678   | 1172.28 | 1219    | 948.458 | 972.576 | -0.2964 | 1.20E-09 | 1.73E-07  | Down-regulated |
| NM_005902    | SMAD3    | 4088   | 136.826 | 145.427 | 113.642 | 113.155 | -0.2962 | 2.86E-07 | 2.23E-05  | Down-regulated |
| NM_000158    | GBE1     | 2632   | 54.279  | 56.5087 | 46.1631 | 42.2741 | -0.2961 | 0.000375 | 0.0073085 | Down-regulated |
| NM_013279    | MYRF     | 745    | 84.3709 | 74.5296 | 62.8879 | 64.3857 | -0.2959 | 4.42E-05 | 0.0013852 | Down-regulated |
| NM_001709    | BDNF     | 627    | 17.8428 | 18.8775 | 14.0661 | 15.1589 | -0.2959 | 0.002728 | 0.0313648 | Down-regulated |
| NM_000189    | HK2      | 3099   | 16.8378 | 16.8161 | 13.7421 | 13.23   | -0.2949 | 9.46E-05 | 0.002509  | Down-regulated |
| NM_002473    | MYH9     | 4627   | 282.9   | 288.444 | 225.269 | 234.982 | -0.2949 | 2.38E-10 | 4.21E-08  | Down-regulated |
| NM_012088    | PGLS     | 25796  | 90.0122 | 88.7342 | 71.575  | 70.0409 | -0.2932 | 0.000797 | 0.0130259 | Down-regulated |
| NM_018425    | PI4K2A   | 55361  | 12.2137 | 12.1301 | 9.59274 | 9.82024 | -0.293  | 0.003294 | 0.0357844 | Down-regulated |
| NR_073024    | RPL13A   | 23521  | 107.407 | 97.1623 | 76.7923 | 85.1295 | -0.2927 | 0.002941 | 0.032918  | Down-regulated |
| NM_001329451 | KANK2    | 25959  | 12.4826 | 12.2693 | 9.38157 | 10.3761 | -0.2915 | 0.003774 | 0.039356  | Down-regulated |
| NM_001184977 | UQCCL1   | 55245  | 35.4215 | 36.8659 | 29.385  | 28.3532 | -0.2905 | 0.001505 | 0.0206685 | Down-regulated |
| NM_017582    | UBE2Q1   | 55585  | 37.9104 | 34.7687 | 28.2504 | 29.956  | -0.2901 | 0.000736 | 0.0122899 | Down-regulated |
| NM_002859    | PXN      | 5829   | 84.6843 | 80.6061 | 67.6805 | 65.5208 | -0.2897 | 9.21E-07 | 5.88E-05  | Down-regulated |
| NM_018201    | TBC1D13  | 54662  | 12.8492 | 12.4784 | 10.2707 | 9.9561  | -0.2895 | 0.004432 | 0.0444425 | Down-regulated |
| NM_001008410 | STEAP3   | 55240  | 14.8723 | 14.1815 | 11.6157 | 11.6484 | -0.2872 | 0.003034 | 0.0336559 | Down-regulated |
| NM_001113491 | 9-Sep    | 10801  | 271.558 | 235.298 | 201.643 | 206.593 | -0.2863 | 0.00011  | 0.0028144 | Down-regulated |
| NM_001080950 | MYO1C    | 4641   | 102.982 | 93.2265 | 82.3982 | 75.7235 | -0.286  | 0.000151 | 0.003601  | Down-regulated |
| NM_006517    | SLC16A2  | 6567   | 13.7236 | 13.2913 | 10.6822 | 10.98   | -0.2855 | 0.003145 | 0.0344352 | Down-regulated |
| NM_022772    | EPS8L2   | 64787  | 116.549 | 96.5215 | 83.867  | 86.8816 | -0.2855 | 0.002643 | 0.0308268 | Down-regulated |
| NM_001195483 | SLC12A8  | 84561  | 26.5202 | 27.478  | 21.7689 | 21.747  | -0.2836 | 0.000756 | 0.0125782 | Down-regulated |
| NM_004207    | SLC16A3  | 9123   | 329.773 | 275.286 | 239.51  | 246.102 | -0.2835 | 0.001191 | 0.017483  | Down-regulated |
| NM_020524    | PBXIP1   | 57326  | 16.7274 | 16.8177 | 13.15   | 13.7675 | -0.2832 | 0.004389 | 0.0440953 | Down-regulated |
| NM_006442    | DRAP1    | 10589  | 481.237 | 394.122 | 338.435 | 357.379 | -0.2831 | 0.003542 | 0.0376555 | Down-regulated |

## TGFβ1 induces cisplatin resistance of NSCLC by G6PD

|              |              |        |         |         |         |         |         |          |           |                |
|--------------|--------------|--------|---------|---------|---------|---------|---------|----------|-----------|----------------|
| NM_004429    | EFNB1        | 1947   | 75.1103 | 62.4302 | 53.3656 | 56.9493 | -0.2829 | 0.004699 | 0.0461632 | Down-regulated |
| NM_001144759 | PHLDB1       | 23187  | 48.0073 | 42.028  | 35.1727 | 37.4938 | -0.2814 | 0.001009 | 0.0154511 | Down-regulated |
| NM_006745    | MSMO1        | 6307   | 60.5183 | 63.2    | 50.956  | 48.8346 | -0.281  | 0.000466 | 0.0085801 | Down-regulated |
| NM_002276    | KRT19        | 3880   | 4714.12 | 4081.26 | 3406.48 | 3667.22 | -0.2807 | 0.000249 | 0.0053669 | Down-regulated |
| NM_005628    | SLC1A5       | 6510   | 117.596 | 101.301 | 84.2777 | 92.0856 | -0.2795 | 0.002021 | 0.0254519 | Down-regulated |
| NM_130787    | AP2A1        | 160    | 57.5195 | 50.5914 | 41.8965 | 45.3041 | -0.2793 | 0.001902 | 0.0243944 | Down-regulated |
| NM_019884    | GSK3A        | 2931   | 39.9409 | 37.9122 | 30.0302 | 32.6397 | -0.2787 | 0.002892 | 0.0326416 | Down-regulated |
| NM_000903    | NQO1         | 1728   | 154.513 | 163.538 | 131.905 | 125.902 | -0.2785 | 3.39E-05 | 0.0011573 | Down-regulated |
| NM_002467    | MYC          | 4609   | 83.634  | 74.9556 | 62.5942 | 65.5127 | -0.2781 | 0.000595 | 0.0105059 | Down-regulated |
| NM_004996    | ABCC1        | 4363   | 30.978  | 32.0275 | 25.8517 | 25.3558 | -0.2779 | 2.63E-05 | 0.0009613 | Down-regulated |
| NM_006015    | ARID1A       | 8289   | 19.4068 | 17.815  | 14.664  | 15.5368 | -0.2773 | 0.000434 | 0.0081039 | Down-regulated |
| NM_032387    | WNK4         | 65266  | 19.2114 | 19.3103 | 15.7357 | 15.4642 | -0.2761 | 0.001171 | 0.0172326 | Down-regulated |
| NM_001458    | FLNC         | 2318   | 104.682 | 99.2929 | 78.5084 | 87.5435 | -0.2756 | 5.87E-05 | 0.0017202 | Down-regulated |
| NM_032466    | ASPH         | 444    | 48.228  | 49.1255 | 40.5875 | 38.5312 | -0.275  | 0.000106 | 0.0027484 | Down-regulated |
| NM_022153    | C10orf54     | 64115  | 28.2741 | 26.9874 | 22.4811 | 22.4538 | -0.2749 | 0.000135 | 0.0033046 | Down-regulated |
| NM_001018003 | SORBS3       | 10174  | 78.768  | 68.2561 | 57.9615 | 60.6718 | -0.2747 | 0.003261 | 0.0355954 | Down-regulated |
| NM_014389    | PELP1        | 27043  | 17.9377 | 17.7029 | 14.0502 | 14.8338 | -0.2729 | 0.003523 | 0.0375401 | Down-regulated |
| NM_004095    | EIF4EBP1     | 1978   | 377.103 | 325.267 | 269.714 | 292.186 | -0.2727 | 0.002649 | 0.0308434 | Down-regulated |
| NR_135828    | LOC101927751 | 1E+08  | 688.039 | 733.278 | 577.23  | 582.781 | -0.2724 | 1.23E-06 | 7.57E-05  | Down-regulated |
| NM_006369    | LRRC41       | 10489  | 38.7744 | 38.2699 | 30.8374 | 31.8348 | -0.2713 | 0.000385 | 0.0074426 | Down-regulated |
| NM_183001    | SHC1         | 6464   | 73.5904 | 63.2182 | 54.6683 | 56.381  | -0.2709 | 0.002018 | 0.0254519 | Down-regulated |
| NM_004924    | ACTN4        | 81     | 478.508 | 418.724 | 352.968 | 378.37  | -0.2699 | 0.000271 | 0.0057318 | Down-regulated |
| NM_014866    | SEC16A       | 9919   | 8.34404 | 8.56846 | 7.02178 | 6.77572 | -0.2676 | 0.002468 | 0.0293324 | Down-regulated |
| NM_004718    | COX7A2L      | 9167   | 126.804 | 121.992 | 99.7544 | 101.985 | -0.2671 | 0.000345 | 0.0068363 | Down-regulated |
| NM_058243    | BRD4         | 23476  | 16.3551 | 16.3622 | 12.8978 | 13.7941 | -0.2664 | 0.002312 | 0.0281136 | Down-regulated |
| NM_002957    | RXRA         | 6256   | 20.282  | 18.4968 | 15.1119 | 16.5239 | -0.2648 | 0.004355 | 0.0439185 | Down-regulated |
| NM_001064    | TKT          | 7086   | 207.952 | 193.146 | 159.433 | 169.1   | -0.2625 | 4.03E-05 | 0.0013039 | Down-regulated |
| NM_004427    | PHC2         | 1912   | 80.768  | 73.2161 | 60.2307 | 65.5221 | -0.2625 | 0.001679 | 0.0224599 | Down-regulated |
| NM_030662    | MAP2K2       | 5605   | 152.548 | 131.79  | 110.746 | 120.519 | -0.2623 | 0.004403 | 0.0441996 | Down-regulated |
| NM_003088    | FSCN1        | 6624   | 347.209 | 285.387 | 249.766 | 266.041 | -0.2621 | 0.004709 | 0.0462099 | Down-regulated |
| NM_000088    | COL1A1       | 1277   | 230.174 | 231.893 | 187.34  | 193.625 | -0.2617 | 1.56E-09 | 2.11E-07  | Down-regulated |
| NM_001037165 | FOXK1        | 221937 | 13.3381 | 13.0259 | 10.6295 | 11.0578 | -0.2612 | 0.000163 | 0.0038303 | Down-regulated |
| NM_014521    | SH3BP4       | 23677  | 20.3463 | 20.1021 | 16.9987 | 16.209  | -0.2601 | 0.001115 | 0.0166712 | Down-regulated |
| NM_002627    | PFKP         | 5214   | 90.1275 | 88.9271 | 76.3021 | 70.6637 | -0.2596 | 0.000229 | 0.0050058 | Down-regulated |
| NM_001130040 | SHC1         | 6464   | 128.631 | 110.103 | 98.6173 | 97.3329 | -0.2572 | 0.001811 | 0.0237588 | Down-regulated |
| NM_007260    | LYPLA2       | 11313  | 60.0822 | 56.314  | 45.9239 | 49.2013 | -0.256  | 0.004791 | 0.0468098 | Down-regulated |
| NM_002224    | ITPR3        | 3710   | 28.3185 | 28.7399 | 23.8436 | 23.3376 | -0.2557 | 1.42E-05 | 0.0005679 | Down-regulated |
| NM_000175    | GPI          | 2821   | 72.5825 | 66.0507 | 58.9496 | 55.2317 | -0.2557 | 0.000604 | 0.0106163 | Down-regulated |
| NM_000308    | CTSA         | 5476   | 56.582  | 59.3841 | 47.1402 | 48.4048 | -0.2549 | 0.000505 | 0.0092012 | Down-regulated |
| NM_005412    | SHMT2        | 6472   | 139.079 | 119.483 | 105.773 | 106.597 | -0.2537 | 0.002634 | 0.0307724 | Down-regulated |
| NM_001131016 | CIZ1         | 25792  | 38.9374 | 36.1934 | 31.305  | 30.5833 | -0.2527 | 0.001834 | 0.02381   | Down-regulated |
| NM_002541    | OGDH         | 4967   | 53.4972 | 54.3405 | 43.286  | 45.9892 | -0.2511 | 0.000183 | 0.004246  | Down-regulated |
| NM_002292    | LAMB2        | 3913   | 56.0087 | 53.5941 | 44.7895 | 46.1513 | -0.2504 | 7.56E-06 | 0.0003306 | Down-regulated |
| NM_033251    | RPL13        | 6137   | 100.182 | 84.0956 | 77.0628 | 75.0133 | -0.249  | 0.004952 | 0.0480348 | Down-regulated |
| NM_020448    | NIPAL3       | 57185  | 19.669  | 19.2579 | 16.2979 | 15.9931 | -0.246  | 0.001266 | 0.0182458 | Down-regulated |
| NM_001849    | COL6A2       | 1292   | 76.6455 | 66.7038 | 57.8575 | 60.7426 | -0.2458 | 0.003817 | 0.039716  | Down-regulated |
| NM_001084    | PLOD3        | 8985   | 48.5438 | 43.2089 | 38.5909 | 37.4108 | -0.243  | 0.005059 | 0.048606  | Down-regulated |
| NM_030981    | RAB1B        | 81876  | 171.02  | 150.846 | 127.458 | 139.141 | -0.2409 | 0.004488 | 0.0446011 | Down-regulated |
| NM_003681    | PDXK         | 8566   | 20.8593 | 21.4815 | 17.4213 | 17.9171 | -0.2405 | 0.000655 | 0.0113189 | Down-regulated |
| NM_006310    | NPEPPS       | 9520   | 31.2231 | 31.4634 | 26.4178 | 25.839  | -0.2404 | 0.000776 | 0.0127896 | Down-regulated |
| NM_005572    | LMNA         | 4000   | 292.944 | 264.407 | 219.093 | 243.674 | -0.2397 | 0.002298 | 0.0280022 | Down-regulated |
| NM_003979    | GPRC5A       | 9052   | 536.779 | 587.541 | 471.457 | 466.541 | -0.239  | 0.000292 | 0.0060232 | Down-regulated |
| NM_000314    | PTEN         | 5728   | 15.9239 | 14.649  | 12.287  | 13.2158 | -0.2374 | 0.004625 | 0.0457123 | Down-regulated |
| NM_003768    | PEA15        | 8682   | 301.973 | 262.478 | 236.685 | 233.781 | -0.2364 | 0.001382 | 0.0194577 | Down-regulated |
| NM_014330    | PPP1R15A     | 23645  | 61.3567 | 61.3825 | 51.4197 | 51.1304 | -0.2344 | 0.000762 | 0.0126457 | Down-regulated |
| NM_139279    | MCFD2        | 90411  | 67.0734 | 71.0363 | 59.5003 | 56.2298 | -0.2328 | 0.00122  | 0.0178173 | Down-regulated |
| NM_138373    | MYADM        | 91663  | 73.6385 | 68.9083 | 57.5513 | 61.8108 | -0.2317 | 0.001545 | 0.0210744 | Down-regulated |

## TGFβ1 induces cisplatin resistance of NSCLC by G6PD

|              |           |        |         |         |         |         |         |          |           |                |
|--------------|-----------|--------|---------|---------|---------|---------|---------|----------|-----------|----------------|
| NM_006148    | LASP1     | 3927   | 211.106 | 190.334 | 164.277 | 172.849 | -0.2303 | 0.000418 | 0.0078948 | Down-regulated |
| NM_014246    | CELSR1    | 9620   | 9.64315 | 9.33298 | 8.04824 | 7.92013 | -0.2277 | 0.002468 | 0.0293324 | Down-regulated |
| NM_004309    | ARHGDI2   | 396    | 204.417 | 199.972 | 167.523 | 172.325 | -0.2274 | 1.39E-05 | 0.0005573 | Down-regulated |
| NM_015060    | AVL9      | 23080  | 22.202  | 22.7766 | 19.1058 | 18.7915 | -0.2273 | 0.001009 | 0.0154511 | Down-regulated |
| NM_001012478 | U2AF2     | 11338  | 125.957 | 109.785 | 97.3333 | 100.751 | -0.2253 | 0.004276 | 0.043239  | Down-regulated |
| NM_017590    | ZC3H7B    | 23264  | 31.8052 | 28.775  | 25.6278 | 25.4785 | -0.2228 | 0.003264 | 0.0355959 | Down-regulated |
| NM_004599    | SREBF2    | 6721   | 42.645  | 38.0711 | 33.3414 | 34.7132 | -0.2227 | 0.004665 | 0.0459874 | Down-regulated |
| NM_017670    | OTUB1     | 55611  | 47.4479 | 45.3322 | 39.4262 | 38.722  | -0.221  | 0.00505  | 0.0485988 | Down-regulated |
| NM_001543    | NDST1     | 3340   | 31.7573 | 32.8687 | 26.219  | 28.4548 | -0.221  | 0.002264 | 0.0277756 | Down-regulated |
| NM_000820    | GAS6      | 2621   | 530.292 | 457.531 | 408.265 | 427.405 | -0.2154 | 0.004493 | 0.0446084 | Down-regulated |
| NM_005918    | MDH2      | 4191   | 101.275 | 95.838  | 80.136  | 86.9054 | -0.213  | 0.004014 | 0.0411885 | Down-regulated |
| NM_021913    | AXL       | 558    | 39.8762 | 39.5992 | 32.7637 | 34.8594 | -0.2121 | 0.002021 | 0.0254519 | Down-regulated |
| NM_000188    | HK1       | 3098   | 35.9782 | 36.7184 | 31.4199 | 30.3676 | -0.2118 | 0.004757 | 0.0465973 | Down-regulated |
| NM_015470    | RAB11FIP5 | 26056  | 39.6194 | 36.4593 | 31.8799 | 32.9456 | -0.2085 | 0.00518  | 0.0494631 | Down-regulated |
| NM_003062    | SLIT3     | 6586   | 13.869  | 14.1524 | 11.746  | 12.1825 | -0.2081 | 0.004114 | 0.0419497 | Down-regulated |
| NM_139179    | DAGLB     | 221955 | 62.8742 | 59.3738 | 51.6141 | 52.7558 | -0.2054 | 0.002399 | 0.028817  | Down-regulated |
| NM_030969    | TMEM14B   | 81853  | 330.82  | 329.509 | 281.337 | 278.38  | -0.2047 | 0.000353 | 0.006981  | Down-regulated |
| NM_014343    | CLDN15    | 24146  | 161.398 | 151.225 | 129.481 | 136.606 | -0.2025 | 0.004516 | 0.0447943 | Down-regulated |
| NM_001913    | CUX1      | 1523   | 46.6691 | 44.5124 | 38.9046 | 39.2148 | -0.2004 | 0.0048   | 0.0468098 | Down-regulated |
| NM_007118    | TRIO      | 7204   | 36.6081 | 36.3938 | 32.1064 | 30.835  | -0.1975 | 0.000223 | 0.0048918 | Down-regulated |
| NM_013318    | PRRC2B    | 84726  | 28.3312 | 28.6952 | 24.4707 | 24.7418 | -0.1966 | 0.00025  | 0.0053826 | Down-regulated |
| NM_001110556 | FLNA      | 2316   | 253.862 | 240.085 | 206.087 | 220.427 | -0.1948 | 0.000335 | 0.006735  | Down-regulated |
| NM_014713    | LAPTM4A   | 9741   | 98.4928 | 99.7511 | 84.9668 | 85.2183 | -0.1942 | 0.003998 | 0.041163  | Down-regulated |
| NM_004817    | TJP2      | 9414   | 41.5496 | 41.3523 | 34.9051 | 36.7535 | -0.1903 | 0.003829 | 0.0397776 | Down-regulated |
| NM_002628    | PFN2      | 5217   | 137.719 | 137.724 | 121.652 | 115.743 | -0.1894 | 0.003358 | 0.0362903 | Down-regulated |
| NM_000527    | LDLR      | 3949   | 100.187 | 94.7168 | 86.8253 | 82.2972 | -0.1863 | 0.001388 | 0.0194808 | Down-regulated |
| NM_001143998 | SEC14L1   | 6397   | 42.0118 | 42.5578 | 36.3491 | 37.1019 | -0.1853 | 0.001868 | 0.0241018 | Down-regulated |
| NM_002086    | GRB2      | 2885   | 57.5541 | 58.2109 | 49.7767 | 50.7442 | -0.1832 | 0.004181 | 0.0424718 | Down-regulated |
| NM_130440    | PTPRF     | 5792   | 617.879 | 571.936 | 504.314 | 531.525 | -0.1828 | 0.000937 | 0.0147411 | Down-regulated |
| NM_014868    | RNF10     | 9921   | 71.1506 | 68.6746 | 60.42   | 61.235  | -0.182  | 0.001119 | 0.0166712 | Down-regulated |
| NM_004938    | DAPK1     | 1612   | 51.0787 | 49.978  | 44.586  | 43.4954 | -0.1812 | 0.0008   | 0.0130612 | Down-regulated |
| NM_002087    | GRN       | 2896   | 208.78  | 194.234 | 173.081 | 177.485 | -0.1795 | 0.001549 | 0.0210841 | Down-regulated |
| NM_001321704 | RPS9      | 6203   | 1453.36 | 1299.53 | 1184.05 | 1174.91 | -0.1771 | 0.003281 | 0.0357072 | Down-regulated |
| NM_005347    | HSPA5     | 3309   | 275.199 | 286.936 | 243.995 | 247.912 | -0.1749 | 0.000593 | 0.0104945 | Down-regulated |
| NM_184041    | ALDOA     | 226    | 751.385 | 701.863 | 622.548 | 644.918 | -0.1728 | 0.000713 | 0.0119938 | Down-regulated |
| NM_001235    | SERPINH1  | 871    | 248.68  | 239.517 | 214.402 | 212.777 | -0.1721 | 0.000203 | 0.0045553 | Down-regulated |
| NM_021009    | UBC       | 7316   | 401.52  | 393.1   | 336.256 | 362.613 | -0.1648 | 0.003138 | 0.0343844 | Down-regulated |
| NM_031286    | SH3BGR1   | 83442  | 302.096 | 298.426 | 259.67  | 265.633 | -0.1631 | 0.003558 | 0.0377539 | Down-regulated |
| NM_001102    | ACTN1     | 87     | 172.279 | 178.984 | 151.669 | 158.38  | -0.1618 | 0.004133 | 0.0421004 | Down-regulated |
| NM_001748    | CANP      | 824    | 197.924 | 196.12  | 175.489 | 173.362 | -0.1582 | 0.000231 | 0.005021  | Down-regulated |
| NM_005720    | ARPC1B    | 10095  | 456.996 | 457.475 | 396.6   | 411.216 | -0.1549 | 0.001566 | 0.021284  | Down-regulated |
| NM_053275    | RPLP0     | 6175   | 1346.03 | 1350.72 | 1169.58 | 1224.94 | -0.145  | 0.002393 | 0.0287861 | Down-regulated |
| NM_004048    | B2M       | 567    | 2365.91 | 2290.95 | 2525.36 | 2443.62 | 0.12212 | 0.002449 | 0.0292338 | Up-regulated   |
| NM_002999    | SDC4      | 6385   | 256.018 | 253.088 | 274.113 | 277.87  | 0.1325  | 0.001699 | 0.0226375 | Up-regulated   |
| NM_002137    | HNRNPA2B1 | 3181   | 209.191 | 207.732 | 224.26  | 229.76  | 0.13702 | 0.001261 | 0.0182343 | Up-regulated   |
| NM_000918    | P4HB      | 5034   | 315.494 | 306.03  | 335.288 | 351.64  | 0.15957 | 0.000966 | 0.0150409 | Up-regulated   |
| NM_002136    | HNRNPA1   | 3178   | 772.057 | 785.383 | 847.144 | 873.609 | 0.1619  | 0.000423 | 0.0079692 | Up-regulated   |
| NM_015238    | WWC1      | 23286  | 44.1697 | 43.1747 | 48.557  | 48.5253 | 0.16362 | 0.001265 | 0.0182458 | Up-regulated   |
| NM_005231    | CTTN      | 2017   | 129.17  | 126.435 | 139.939 | 143.68  | 0.16394 | 0.000676 | 0.01156   | Up-regulated   |
| NM_007173    | PRSS23    | 11098  | 325.504 | 331.264 | 361.481 | 368.44  | 0.16559 | 0.000115 | 0.0029317 | Up-regulated   |
| NM_014502    | PRPF19    | 27339  | 98.7334 | 94.7565 | 106.831 | 108.736 | 0.17027 | 0.003511 | 0.0375359 | Up-regulated   |
| NM_006622    | PLK2      | 10769  | 205.345 | 207.662 | 229.939 | 231.226 | 0.17357 | 0.000143 | 0.0034596 | Up-regulated   |
| NM_018218    | USP40     | 55230  | 26.7909 | 26.6092 | 30.1601 | 29.8498 | 0.17812 | 0.005244 | 0.049983  | Up-regulated   |
| NM_006088    | TUBB4B    | 10383  | 153.433 | 143.763 | 164.597 | 167.552 | 0.17819 | 0.004101 | 0.0419101 | Up-regulated   |
| NM_006937    | SUMO2     | 6613   | 230.91  | 221.796 | 248.755 | 255.561 | 0.17968 | 0.00313  | 0.0343728 | Up-regulated   |
| NM_004404    | 2-Sep     | 4735   | 187     | 189.141 | 214.637 | 210.125 | 0.18879 | 5.59E-05 | 0.0016561 | Up-regulated   |
| NM_018947    | CYCS      | 54205  | 47.556  | 48.6059 | 54.0842 | 54.7398 | 0.18892 | 0.000779 | 0.0128178 | Up-regulated   |

## TGFβ1 induces cisplatin resistance of NSCLC by G6PD

|              |         |        |         |         |         |         |         |          |           |              |
|--------------|---------|--------|---------|---------|---------|---------|---------|----------|-----------|--------------|
| NM_021130    | PPIA    | 5478   | 667.868 | 719.254 | 778.556 | 788.469 | 0.18931 | 0.001753 | 0.0231455 | Up-regulated |
| NM_001207    | BTF3    | 689    | 599.341 | 637.033 | 692.903 | 705.305 | 0.20104 | 0.001538 | 0.0210189 | Up-regulated |
| NM_006169    | NNMT    | 4837   | 253.689 | 250.524 | 276.685 | 296.67  | 0.20257 | 0.000872 | 0.0139996 | Up-regulated |
| NM_015161    | ARL6IP1 | 23204  | 94.4268 | 95.4252 | 109.723 | 106.892 | 0.20344 | 0.000671 | 0.0115281 | Up-regulated |
| NM_004964    | HDAC1   | 3065   | 58.7518 | 61.1922 | 69.0885 | 68.5972 | 0.21011 | 0.005217 | 0.0497721 | Up-regulated |
| NM_201442    | C1S     | 716    | 96.4691 | 101.926 | 114.927 | 113.151 | 0.21234 | 0.001064 | 0.0160887 | Up-regulated |
| NM_178014    | TUBB    | 203068 | 397.178 | 357.836 | 429.687 | 438.089 | 0.21385 | 0.000378 | 0.0073518 | Up-regulated |
| NM_003400    | XPO1    | 7514   | 41.1272 | 42.9224 | 49.076  | 47.8298 | 0.21389 | 0.001249 | 0.0181361 | Up-regulated |
| NM_006601    | PTGES3  | 10728  | 129.186 | 141.224 | 156.537 | 155.489 | 0.21725 | 0.00395  | 0.040803  | Up-regulated |
| NM_032737    | LMNB2   | 84823  | 69.5504 | 62.9529 | 73.5734 | 79.7722 | 0.21819 | 0.003861 | 0.0399605 | Up-regulated |
| NM_004501    | HNRNPU  | 3192   | 37.1324 | 39.9639 | 43.0232 | 46.3591 | 0.21858 | 0.00448  | 0.0446011 | Up-regulated |
| NM_004670    | PAPSS2  | 9060   | 91.6561 | 99.1997 | 112.298 | 108.686 | 0.21973 | 0.001719 | 0.022774  | Up-regulated |
| NM_006342    | TACC3   | 10460  | 32.2189 | 32.8661 | 37.7079 | 37.7766 | 0.22242 | 0.00436  | 0.0439254 | Up-regulated |
| NM_005381    | NCL     | 4691   | 228.837 | 253.335 | 277.655 | 281.731 | 0.22345 | 0.001969 | 0.0249347 | Up-regulated |
| NM_001101    | ACTB    | 60     | 1769.46 | 1915.24 | 2078.35 | 2185.46 | 0.2242  | 0.000624 | 0.0109052 | Up-regulated |
| NM_001539    | DNAJA1  | 3301   | 50.775  | 53.5034 | 61.0111 | 60.0765 | 0.22455 | 0.003759 | 0.0392934 | Up-regulated |
| NM_001024465 | SOD2    | 6648   | 344.741 | 315.292 | 396.785 | 364.739 | 0.22681 | 0.002045 | 0.025667  | Up-regulated |
| NM_002271    | IPO5    | 3843   | 48.1529 | 51.2984 | 57.7114 | 58.0436 | 0.2269  | 0.000465 | 0.0085654 | Up-regulated |
| NM_018269    | ADI1    | 55256  | 65.9957 | 65.9648 | 74.9234 | 78.3202 | 0.22784 | 0.003058 | 0.0337563 | Up-regulated |
| NM_001733    | C1R     | 715    | 156.105 | 147.215 | 170.968 | 181.063 | 0.22821 | 0.000198 | 0.0045056 | Up-regulated |
| NM_001291964 | AFDN    | 4301   | 42.4942 | 42.7454 | 49.1887 | 50.0126 | 0.22875 | 5.71E-06 | 0.0002667 | Up-regulated |
| NM_004339    | PTTG1IP | 754    | 190.278 | 204.056 | 226.054 | 232.781 | 0.22924 | 0.000334 | 0.006735  | Up-regulated |
| NM_001357    | DHX9    | 1660   | 28.4821 | 29.664  | 33.6343 | 34.2865 | 0.23121 | 0.001408 | 0.0196891 | Up-regulated |
| NM_001416    | EIF4A1  | 1973   | 387.127 | 411.709 | 458.137 | 470.422 | 0.23121 | 0.000128 | 0.0031799 | Up-regulated |
| NM_016284    | CNOT1   | 23019  | 11.5619 | 12.2423 | 14.162  | 13.7497 | 0.23294 | 0.004311 | 0.0435553 | Up-regulated |
| NM_003064    | SLPI    | 6590   | 2799.53 | 2714.68 | 3092.81 | 3179.1  | 0.23372 | 9.72E-08 | 8.82E-06  | Up-regulated |
| NM_006464    | TGOLN2  | 10618  | 26.8288 | 29.6941 | 33.2652 | 33.0717 | 0.23437 | 0.004243 | 0.0430237 | Up-regulated |
| NM_002893    | RBBP7   | 5931   | 57.9174 | 61.1192 | 69.117  | 70.0446 | 0.235   | 0.002847 | 0.0323669 | Up-regulated |
| NM_014142    | NUDT5   | 11164  | 22.2737 | 22.919  | 26.117  | 26.8748 | 0.23515 | 0.004975 | 0.0481706 | Up-regulated |
| NM_031157    | HNRNPA1 | 3178   | 73.6539 | 73.1757 | 82.9965 | 88.568  | 0.23642 | 0.001401 | 0.0196277 | Up-regulated |
| NM_001282667 | MICAL2  | 9645   | 30.2634 | 30.2803 | 34.6925 | 36.3809 | 0.2394  | 0.000119 | 0.003003  | Up-regulated |
| NM_018976    | SLC38A2 | 54407  | 79.5926 | 85.8828 | 96.4616 | 97.8931 | 0.23968 | 0.000299 | 0.0061092 | Up-regulated |
| NM_002802    | PSMC1   | 5700   | 73.7584 | 76.356  | 87.0583 | 88.9841 | 0.24267 | 0.00163  | 0.021956  | Up-regulated |
| NM_004515    | ILF2    | 3608   | 79.5745 | 84.9582 | 98.3578 | 95.086  | 0.24314 | 0.001967 | 0.0249347 | Up-regulated |
| NM_021103    | TMSB10  | 9168   | 4147.59 | 3962.09 | 4586.06 | 4575.44 | 0.24428 | 3.51E-10 | 5.84E-08  | Up-regulated |
| NM_018370    | DRAM1   | 55332  | 45.4163 | 44.4243 | 54.1507 | 51.5998 | 0.24444 | 0.000296 | 0.0060801 | Up-regulated |
| NM_003076    | SMARCD1 | 6602   | 25.9128 | 24.9001 | 29.1889 | 30.7604 | 0.24455 | 0.002659 | 0.0309317 | Up-regulated |
| NM_016025    | METTL9  | 51108  | 21.1995 | 19.8883 | 24.005  | 24.5545 | 0.24563 | 0.005009 | 0.0483807 | Up-regulated |
| NM_006888    | CALM1   | 801    | 32.103  | 33.659  | 38.1764 | 39.6174 | 0.24845 | 0.000795 | 0.0130217 | Up-regulated |
| NM_001124    | ADM     | 133    | 145.715 | 139.531 | 160.171 | 176.123 | 0.25042 | 0.000878 | 0.0140779 | Up-regulated |
| NM_002129    | HMGB2   | 3148   | 85.7614 | 82.4405 | 95.9032 | 102.572 | 0.25126 | 0.001239 | 0.0180235 | Up-regulated |
| NM_002748    | MAPK6   | 5597   | 24.8332 | 26.3769 | 30.5658 | 30.2595 | 0.25239 | 0.001652 | 0.0222036 | Up-regulated |
| NM_016038    | SBDS    | 51119  | 56.6029 | 58.2016 | 67.3448 | 68.6843 | 0.25502 | 0.0018   | 0.0236442 | Up-regulated |
| NM_002804    | PSMC3   | 5702   | 107.967 | 104.607 | 125.124 | 126.041 | 0.25609 | 5.48E-05 | 0.001636  | Up-regulated |
| NM_001195532 | SPTAN1  | 6709   | 14.0521 | 15.2168 | 17.4199 | 17.5196 | 0.25717 | 0.001822 | 0.0237913 | Up-regulated |
| NM_005594    | NACA    | 4666   | 153.843 | 165.195 | 188.097 | 189.599 | 0.26018 | 0.001074 | 0.0162028 | Up-regulated |
| NM_181575    | AUP1    | 550    | 61.563  | 62.1461 | 72.87   | 74.1551 | 0.26036 | 0.000682 | 0.0116401 | Up-regulated |
| NM_203499    | DDX42   | 11325  | 25.4878 | 27.5305 | 30.4478 | 33.2442 | 0.26435 | 0.004559 | 0.0451389 | Up-regulated |
| NM_003754    | EIF3F   | 8665   | 145.138 | 150.909 | 172.078 | 179.724 | 0.26472 | 0.000277 | 0.0058029 | Up-regulated |
| NM_012073    | CCT5    | 22948  | 61.289  | 63.5127 | 75.2165 | 73.9506 | 0.26637 | 1.80E-05 | 0.000681  | Up-regulated |
| NM_007100    | ATP5I   | 521    | 668.792 | 588.858 | 701.522 | 692.767 | 0.2677  | 0.001878 | 0.0242038 | Up-regulated |
| NM_001293    | CLNS1A  | 1207   | 84.3661 | 83.1435 | 99.8122 | 99.9425 | 0.26846 | 0.00023  | 0.0050143 | Up-regulated |
| NM_003079    | SMARCE1 | 6605   | 40.3955 | 41.4435 | 47.9943 | 50.2883 | 0.27104 | 0.000726 | 0.0121473 | Up-regulated |
| NM_020150    | SAR1A   | 56681  | 59.1598 | 61.5421 | 71.3069 | 73.7326 | 0.27332 | 6.11E-05 | 0.0017652 | Up-regulated |
| NM_001127228 | CBX1    | 10951  | 50.4419 | 54.6274 | 62.6259 | 63.8947 | 0.27342 | 0.001262 | 0.0182343 | Up-regulated |
| NM_016079    | CHMP3   | 51652  | 28.0929 | 28.23   | 33.8048 | 33.9825 | 0.27363 | 0.000354 | 0.0069888 | Up-regulated |
| NM_004526    | MCM2    | 4171   | 20.9479 | 21.0211 | 24.5643 | 26.074  | 0.27366 | 0.001539 | 0.0210189 | Up-regulated |

## TGFβ1 induces cisplatin resistance of NSCLC by G6PD

|              |          |        |         |         |         |         |         |          |           |              |
|--------------|----------|--------|---------|---------|---------|---------|---------|----------|-----------|--------------|
| NM_001135146 | SLC39A8  | 64116  | 39.3456 | 39.8361 | 46.4905 | 48.7797 | 0.27382 | 0.000174 | 0.0040515 | Up-regulated |
| NM_005733    | KIF20A   | 10112  | 22.2917 | 21.8038 | 25.7558 | 27.4279 | 0.27387 | 0.00133  | 0.01894   | Up-regulated |
| NM_006908    | RAC1     | 5879   | 180.387 | 204.663 | 227.594 | 236.44  | 0.27439 | 0.000987 | 0.0152717 | Up-regulated |
| NM_145725    | TRAF3    | 7187   | 11.4197 | 10.6064 | 13.8984 | 12.7594 | 0.27443 | 0.002577 | 0.0303289 | Up-regulated |
| NM_001710    | CFB      | 629    | 149.681 | 159.685 | 185.161 | 186.471 | 0.27463 | 1.42E-05 | 0.0005679 | Up-regulated |
| NM_024117    | MAPKAP1  | 79109  | 18.1995 | 16.7872 | 21.8745 | 20.474  | 0.27477 | 0.005161 | 0.0493267 | Up-regulated |
| NM_018284    | GBP3     | 2635   | 22.2604 | 22.1294 | 28.3518 | 25.4763 | 0.27706 | 0.004827 | 0.0469067 | Up-regulated |
| NM_002156    | HSPD1    | 3329   | 242.265 | 260.41  | 296.952 | 308.376 | 0.27829 | 2.18E-05 | 0.0008101 | Up-regulated |
| NM_001032283 | TMPO     | 7112   | 12.7634 | 12.5875 | 15.4439 | 15.3656 | 0.28106 | 0.001928 | 0.0245867 | Up-regulated |
| NM_001412    | EIF1AX   | 1964   | 21.343  | 23.7268 | 27.3137 | 27.5008 | 0.28134 | 0.002278 | 0.0278133 | Up-regulated |
| NM_001330218 | CCNYL1   | 151195 | 27.4805 | 29.4255 | 34.5075 | 34.495  | 0.28166 | 0.000514 | 0.0093203 | Up-regulated |
| NM_021239    | RBM25    | 58517  | 17.8566 | 16.7278 | 20.2591 | 21.7929 | 0.28234 | 0.00171  | 0.0226815 | Up-regulated |
| NM_032940    | POLR2C   | 5432   | 27.1568 | 27.1197 | 33.4891 | 32.4565 | 0.28356 | 0.003709 | 0.0389338 | Up-regulated |
| NM_015913    | TXNDC12  | 51060  | 25.7648 | 28.1791 | 33.1128 | 32.6204 | 0.28415 | 0.004017 | 0.0411885 | Up-regulated |
| NM_001134373 | NT5C2    | 22978  | 39.0776 | 38.9465 | 48.3187 | 46.2328 | 0.28445 | 5.23E-05 | 0.0015894 | Up-regulated |
| NM_024576    | UGFRL1   | 79627  | 6.33939 | 6.73681 | 7.87514 | 8.10083 | 0.28558 | 0.002333 | 0.0282152 | Up-regulated |
| NM_015332    | NOFCD3   | 23386  | 17.523  | 17.7939 | 21.667  | 21.3444 | 0.28766 | 0.000217 | 0.0047831 | Up-regulated |
| NM_002265    | KPNB1    | 3837   | 71.8347 | 80.7283 | 92.3939 | 93.582  | 0.28825 | 0.00034  | 0.0067872 | Up-regulated |
| NM_003472    | DEK      | 7913   | 63.2066 | 68.4631 | 81.443  | 78.8473 | 0.2892  | 0.000194 | 0.0044528 | Up-regulated |
| NM_001101662 | NRDC     | 4898   | 39.8119 | 46.4987 | 52.6116 | 53.1535 | 0.28937 | 0.003372 | 0.0364094 | Up-regulated |
| NM_015294    | TRIM37   | 4591   | 11.7967 | 12.2635 | 14.61   | 14.9321 | 0.29443 | 0.001575 | 0.0213746 | Up-regulated |
| NM_001042424 | WHSC1    | 7468   | 12.7787 | 13.3236 | 15.8926 | 16.0792 | 0.29525 | 0.000131 | 0.0032168 | Up-regulated |
| NM_020401    | NUP107   | 57122  | 10.1482 | 10.2791 | 12.9738 | 12.1388 | 0.29696 | 0.001122 | 0.0166712 | Up-regulated |
| NM_016395    | HACD3    | 51495  | 33.0299 | 37.9336 | 44.8003 | 42.6846 | 0.29698 | 0.003429 | 0.0368083 | Up-regulated |
| NM_005316    | GTF2H1   | 2965   | 19.6437 | 22.0896 | 26.1268 | 25.3394 | 0.2973  | 0.003955 | 0.0408155 | Up-regulated |
| NM_001431    | EPB41L2  | 2037   | 14.0542 | 15.4993 | 18.656  | 17.8222 | 0.2979  | 0.003065 | 0.0337935 | Up-regulated |
| NM_017828    | COMMD4   | 54939  | 70.2385 | 68.0438 | 80.6744 | 88.136  | 0.29892 | 0.002819 | 0.0321106 | Up-regulated |
| NM_001311    | CRIP1    | 1396   | 612.598 | 594.76  | 715.771 | 706.847 | 0.30033 | 4.36E-06 | 0.0002195 | Up-regulated |
| NM_002843    | PTPRJ    | 5795   | 19.8632 | 22.0248 | 26.1712 | 25.4663 | 0.30148 | 0.000338 | 0.0067686 | Up-regulated |
| NM_030798    | RCC1L    | 81554  | 22.4888 | 21.7916 | 26.9771 | 27.568  | 0.3016  | 0.001099 | 0.0164879 | Up-regulated |
| NM_005610    | RBBP4    | 5928   | 6.58746 | 7.1759  | 8.46824 | 8.57256 | 0.30214 | 0.002275 | 0.0278133 | Up-regulated |
| NM_001199802 | RPL11    | 6135   | 775.324 | 790.007 | 968.08  | 911.184 | 0.30244 | 2.01E-06 | 0.0001124 | Up-regulated |
| NM_003751    | EIF3B    | 8662   | 47.6046 | 41.4637 | 55.7875 | 53.9732 | 0.30321 | 0.000636 | 0.0110755 | Up-regulated |
| NM_004905    | PRDX6    | 9588   | 127.43  | 143.929 | 164.442 | 169.373 | 0.30386 | 0.000582 | 0.0103553 | Up-regulated |
| NM_015213    | DENND5A  | 23258  | 16.1437 | 16.7963 | 20.7015 | 19.9752 | 0.30478 | 0.000275 | 0.0057763 | Up-regulated |
| NM_013390    | TMEM2    | 23670  | 11.7358 | 13.5327 | 15.2054 | 16.245  | 0.30509 | 0.004556 | 0.0451389 | Up-regulated |
| NM_005983    | SKP2     | 6502   | 43.7688 | 52.1816 | 60.8362 | 58.3851 | 0.30558 | 0.003832 | 0.0397776 | Up-regulated |
| NM_003798    | CTNNA1   | 8727   | 90.3429 | 98.8612 | 114.911 | 118.143 | 0.3062  | 6.90E-05 | 0.0019442 | Up-regulated |
| NM_001032    | RPS29    | 6235   | 4590.3  | 4604.14 | 5162.77 | 5099.14 | 0.30913 | 9.49E-06 | 0.0004041 | Up-regulated |
| NM_020362    | PITHD1   | 57095  | 27.5984 | 25.912  | 33.1418 | 33.1638 | 0.30961 | 0.002566 | 0.0303289 | Up-regulated |
| NM_002645    | PIK3C2A  | 5286   | 7.89794 | 7.75627 | 9.84444 | 9.57292 | 0.3104  | 0.000215 | 0.0047621 | Up-regulated |
| NM_014865    | NCAPD2   | 9918   | 25.0845 | 28.406  | 32.4937 | 34.0693 | 0.31114 | 0.001028 | 0.0156295 | Up-regulated |
| NM_001254738 | RND3     | 390    | 19.283  | 21.3988 | 26.4251 | 24.3649 | 0.31132 | 0.004487 | 0.0446011 | Up-regulated |
| NM_003642    | HAT1     | 8520   | 30.7005 | 32.6466 | 39.5124 | 39.2664 | 0.31385 | 0.001748 | 0.0231204 | Up-regulated |
| NM_006052    | DSCR3    | 10311  | 14.5501 | 14.5664 | 18.4117 | 17.8468 | 0.31393 | 0.001092 | 0.0164252 | Up-regulated |
| NM_015068    | PEG10    | 23089  | 5.69538 | 5.86431 | 7.4775  | 7.03026 | 0.3165  | 0.002917 | 0.0327747 | Up-regulated |
| NM_001379    | DNMT1    | 1786   | 9.96464 | 10.2593 | 13.0667 | 12.2508 | 0.31913 | 0.000899 | 0.0142913 | Up-regulated |
| NM_005471    | GNPDA1   | 10007  | 61.6734 | 63.9498 | 79.3537 | 76.6145 | 0.31983 | 1.06E-05 | 0.0004429 | Up-regulated |
| NM_006197    | PCM1     | 5108   | 4.98557 | 4.4703  | 5.9338  | 5.95904 | 0.32005 | 0.002327 | 0.0281751 | Up-regulated |
| NM_004090    | DUSP3    | 1845   | 27.2255 | 27.7227 | 34.9107 | 33.5577 | 0.32134 | 1.52E-05 | 0.0005988 | Up-regulated |
| NM_007145    | ZNF146   | 7705   | 10.3567 | 10.4815 | 13.0811 | 13.0731 | 0.32138 | 0.001387 | 0.0194808 | Up-regulated |
| NM_001135699 | YWHAZ    | 7534   | 14.1956 | 15.513  | 19.032  | 18.3341 | 0.32201 | 0.002922 | 0.0327747 | Up-regulated |
| NM_031966    | CCNB1    | 891    | 51.2904 | 52.1952 | 63.7191 | 65.0434 | 0.32251 | 1.19E-05 | 0.0004897 | Up-regulated |
| NM_001172624 | NEO1     | 4756   | 16.5252 | 19.7469 | 23.6013 | 22.2529 | 0.32447 | 0.003136 | 0.0343844 | Up-regulated |
| NM_002572    | PAFAH1B2 | 5049   | 18.5591 | 19.6866 | 23.9452 | 24.0531 | 0.32745 | 0.000128 | 0.0031799 | Up-regulated |
| NM_018154    | ASF1B    | 55723  | 20.394  | 20.0673 | 25.7181 | 25.2266 | 0.32747 | 0.002702 | 0.0311758 | Up-regulated |
| NM_004805    | POLR2D   | 5433   | 12.9201 | 12.7979 | 16.3254 | 16.2056 | 0.32768 | 0.003989 | 0.0411335 | Up-regulated |



## TGFβ1 induces cisplatin resistance of NSCLC by G6PD

|              |          |        |         |         |         |         |         |          |           |              |
|--------------|----------|--------|---------|---------|---------|---------|---------|----------|-----------|--------------|
| NM_004550    | NDUFS2   | 4720   | 32.6387 | 33.671  | 41.4916 | 41.6118 | 0.32844 | 0.000179 | 0.0041569 | Up-regulated |
| NM_016097    | IER3IP1  | 51124  | 28.0071 | 24.1784 | 32.9146 | 33.0019 | 0.32916 | 0.00498  | 0.0481834 | Up-regulated |
| NM_001032293 | ZNF207   | 7756   | 36.2687 | 37.1059 | 46.2646 | 45.6302 | 0.32923 | 5.48E-05 | 0.001636  | Up-regulated |
| NM_002717    | PPP2R2A  | 5520   | 13.9462 | 14.5578 | 18.625  | 17.3407 | 0.32935 | 0.000806 | 0.0131322 | Up-regulated |
| NM_007287    | MME      | 4311   | 8.80875 | 8.71355 | 11.9358 | 10.3048 | 0.33027 | 0.003525 | 0.0375401 | Up-regulated |
| NM_001156    | ANXA7    | 310    | 39.1161 | 43.0339 | 49.6932 | 53.9193 | 0.33121 | 0.000643 | 0.0111656 | Up-regulated |
| NM_006469    | IVNS1ABP | 10625  | 11.5559 | 12.5365 | 14.6219 | 15.9379 | 0.33162 | 0.002062 | 0.0258139 | Up-regulated |
| NM_003902    | FUBP1    | 8880   | 18.7251 | 21.1164 | 25.1134 | 25.4123 | 0.33187 | 0.002703 | 0.0311758 | Up-regulated |
| NM_000019    | ACAT1    | 38     | 24.6822 | 27.3678 | 33.6584 | 32.1701 | 0.33207 | 0.001898 | 0.0243823 | Up-regulated |
| NM_001128148 | TFRC     | 7037   | 54.2646 | 60.7746 | 74.0814 | 70.7882 | 0.33231 | 5.77E-05 | 0.0017039 | Up-regulated |
| NM_015110    | SMC5     | 23137  | 5.66895 | 6.24648 | 7.45435 | 7.73095 | 0.33302 | 0.003538 | 0.0376424 | Up-regulated |
| NM_032704    | TUBA1C   | 84790  | 333.201 | 346.739 | 423.877 | 424.834 | 0.3348  | 6.48E-10 | 1.05E-07  | Up-regulated |
| NM_030796    | VOPP1    | 81552  | 25.5826 | 26.843  | 32.5207 | 33.6017 | 0.33518 | 0.000104 | 0.002723  | Up-regulated |
| NM_004689    | MTA1     | 9112   | 25.3622 | 30.7018 | 35.3659 | 36.2191 | 0.33533 | 0.004646 | 0.0458352 | Up-regulated |
| NM_005158    | ABL2     | 27     | 9.52726 | 10.5148 | 11.9561 | 13.5225 | 0.33636 | 0.000813 | 0.0132038 | Up-regulated |
| NM_024423    | DSC3     | 1825   | 5.62092 | 6.61135 | 7.91273 | 7.76052 | 0.33664 | 0.004697 | 0.0461632 | Up-regulated |
| NM_001193417 | DDX3X    | 1654   | 16.2002 | 17.5936 | 22.6589 | 20.3351 | 0.33757 | 0.001095 | 0.0164555 | Up-regulated |
| NM_015033    | FNBP1    | 23048  | 6.66978 | 7.19364 | 8.74178 | 8.93609 | 0.33771 | 0.001825 | 0.0237978 | Up-regulated |
| NM_002913    | RFC1     | 5981   | 6.9571  | 6.06773 | 8.29771 | 8.35815 | 0.3379  | 0.004367 | 0.0439511 | Up-regulated |
| NM_004111    | FEN1     | 2237   | 15.9773 | 16.1044 | 20.3949 | 20.3703 | 0.33856 | 0.001329 | 0.01894   | Up-regulated |
| NM_001002800 | SMC4     | 10051  | 15.2677 | 17.5681 | 22.1092 | 19.8667 | 0.33867 | 0.002434 | 0.0291132 | Up-regulated |
| NM_003090    | SNRPA1   | 6627   | 73.7994 | 73.0112 | 90.9409 | 93.2539 | 0.33904 | 6.74E-05 | 0.0019117 | Up-regulated |
| NR_138470    | HNRNPA3  | 220988 | 16.8881 | 17.8928 | 22.4003 | 21.6958 | 0.34183 | 2.88E-05 | 0.0010297 | Up-regulated |
| NM_015190    | DNAJC9   | 23234  | 18.6813 | 19.6605 | 23.7386 | 25.0952 | 0.34219 | 0.001004 | 0.015413  | Up-regulated |
| NM_024830    | LPCAT1   | 79888  | 9.14472 | 9.05625 | 11.2408 | 12.0043 | 0.34227 | 0.00143  | 0.0199192 | Up-regulated |
| NM_003406    | YWHAZ    | 7534   | 32.7141 | 38.4138 | 44.2457 | 46.6311 | 0.34247 | 0.001504 | 0.0206685 | Up-regulated |
| NM_004705    | THAP12   | 5612   | 10.1161 | 9.74188 | 13.2351 | 12.2026 | 0.34317 | 0.002549 | 0.0301679 | Up-regulated |
| NM_014683    | ULK2     | 9706   | 2.95018 | 2.95483 | 3.77226 | 3.81474 | 0.34413 | 0.002578 | 0.0303289 | Up-regulated |
| NM_002940    | ABCE1    | 6059   | 20.5265 | 25.0047 | 28.8074 | 29.7733 | 0.34517 | 0.00319  | 0.0348562 | Up-regulated |
| NM_182760    | SUMF1    | 285362 | 12.1868 | 12.1249 | 15.2333 | 16.0096 | 0.34533 | 0.004445 | 0.04445   | Up-regulated |
| NM_006758    | U2AF1    | 7307   | 79.8551 | 79.2238 | 98.3432 | 102.071 | 0.34565 | 0.000105 | 0.002723  | Up-regulated |
| NM_206963    | RARRES1  | 5918   | 147.309 | 161.813 | 189.416 | 201.811 | 0.34579 | 3.73E-05 | 0.0012264 | Up-regulated |
| NM_004986    | KTN1     | 3895   | 16.4297 | 17.3814 | 22.228  | 20.8706 | 0.34621 | 0.000141 | 0.0034194 | Up-regulated |
| NM_001798    | CDK2     | 1017   | 24.0485 | 26.4472 | 34.6927 | 30.2448 | 0.3476  | 0.003034 | 0.0336559 | Up-regulated |
| NM_002979    | SCP2     | 6342   | 12.0864 | 12.8431 | 15.6399 | 16.3974 | 0.34761 | 0.002162 | 0.0267059 | Up-regulated |
| NM_033296    | MRFAP1   | 93621  | 90.6579 | 91.7509 | 112.889 | 117.89  | 0.34918 | 4.71E-08 | 4.58E-06  | Up-regulated |
| NM_005916    | MCM7     | 4176   | 42.5946 | 38.4707 | 48.8083 | 54.6792 | 0.34927 | 0.000208 | 0.0046532 | Up-regulated |
| NM_001136139 | TCF3     | 6929   | 9.57765 | 8.72467 | 11.1334 | 12.5291 | 0.35173 | 0.002807 | 0.0320368 | Up-regulated |
| NM_001309840 | GNAS     | 2778   | 111.268 | 91.6144 | 131.229 | 127.932 | 0.35221 | 0.000473 | 0.0086918 | Up-regulated |
| NM_201414    | APP      | 351    | 15.1429 | 15.0073 | 19.5583 | 19.0741 | 0.35429 | 0.000121 | 0.00303   | Up-regulated |
| NM_002823    | PTMA     | 5757   | 497.537 | 524.638 | 622.092 | 672.039 | 0.35493 | 3.28E-07 | 2.48E-05  | Up-regulated |
| NM_006401    | ANP32B   | 10541  | 91.867  | 104.779 | 118.312 | 134.577 | 0.35562 | 0.000955 | 0.0149462 | Up-regulated |
| NM_030940    | ISCA1    | 81689  | 22.8027 | 25.8964 | 31.513  | 31.3706 | 0.35638 | 0.001642 | 0.0220985 | Up-regulated |
| NM_002128    | HMGB1    | 3146   | 41.9607 | 42.2172 | 52.9797 | 54.3653 | 0.35765 | 4.27E-09 | 5.33E-07  | Up-regulated |
| NM_006708    | GLO1     | 2739   | 18.7763 | 21.743  | 25.5394 | 27.2224 | 0.35931 | 0.003677 | 0.0387152 | Up-regulated |
| NM_004703    | RABEP1   | 9135   | 7.72942 | 8.40002 | 11.1995 | 9.81635 | 0.36074 | 0.002065 | 0.0258211 | Up-regulated |
| NM_016433    | GLTP     | 51228  | 21.7456 | 23.5505 | 28.5568 | 29.9201 | 0.36091 | 0.00044  | 0.0081807 | Up-regulated |
| NM_001313998 | BECN1    | 8678   | 10.6741 | 11.0472 | 14.0237 | 14.3484 | 0.36196 | 0.004456 | 0.0445256 | Up-regulated |
| NM_003815    | ADAM15   | 8751   | 51.7793 | 43.6075 | 56.2089 | 68.0436 | 0.36207 | 0.00271  | 0.0312282 | Up-regulated |
| NM_000140    | FECH     | 2235   | 4.18023 | 4.0701  | 5.44802 | 5.2825  | 0.36218 | 0.001045 | 0.015852  | Up-regulated |
| NM_003875    | GMPS     | 8833   | 25.4515 | 28.3105 | 35.0952 | 34.4076 | 0.36297 | 0.000342 | 0.0068006 | Up-regulated |
| NM_144600    | FOPNL    | 123811 | 12.2356 | 11.7503 | 15.9614 | 15.3028 | 0.36517 | 0.002002 | 0.0253325 | Up-regulated |
| NM_006609    | MAP3K2   | 10746  | 4.24826 | 4.47494 | 5.75169 | 5.5659  | 0.36529 | 0.000187 | 0.0043063 | Up-regulated |
| NM_003435    | ZNF134   | 7693   | 5.92075 | 6.06798 | 7.89906 | 7.74062 | 0.36723 | 0.001073 | 0.0162028 | Up-regulated |
| NM_001042517 | DIAPH3   | 81624  | 11.2023 | 11.4287 | 14.3607 | 14.9565 | 0.36755 | 6.07E-05 | 0.0017633 | Up-regulated |
| NM_006845    | KIF2C    | 11004  | 12.6541 | 13.4557 | 18.7295 | 15.6597 | 0.36913 | 0.004646 | 0.0458352 | Up-regulated |
| NM_001017371 | SP3      | 6670   | 6.2889  | 6.79195 | 8.93395 | 8.17714 | 0.36933 | 0.001135 | 0.0168242 | Up-regulated |
| NM_001921    | DCTD     | 1635   | 14.9085 | 17.0616 | 20.1231 | 21.9707 | 0.36985 | 0.004594 | 0.0454471 | Up-regulated |

## TGFβ1 induces cisplatin resistance of NSCLC by G6PD

|              |           |        |          |          |         |         |         |          |           |              |
|--------------|-----------|--------|----------|----------|---------|---------|---------|----------|-----------|--------------|
| NM_004856    | KIF23     | 9493   | 15.9473  | 17.0222  | 22.8677 | 20.1836 | 0.37022 | 0.000815 | 0.0132119 | Up-regulated |
| NM_004889    | ATP5J2    | 9551   | 243.429  | 241.965  | 291.925 | 318.701 | 0.37118 | 0.000143 | 0.0034596 | Up-regulated |
| NM_014463    | LSM3      | 27258  | 110.947  | 117.312  | 143.194 | 148.687 | 0.37132 | 0.000199 | 0.0045172 | Up-regulated |
| NM_001127371 | CDCA7L    | 55536  | 8.8731   | 8.15995  | 10.9371 | 11.476  | 0.37183 | 0.003407 | 0.0366114 | Up-regulated |
| NM_001202543 | CUX1      | 1523   | 5.54115  | 6.78875  | 7.81339 | 8.50878 | 0.3768  | 0.002043 | 0.025667  | Up-regulated |
| NM_018434    | RNF130    | 55819  | 14.4833  | 17.0361  | 20.9117 | 20.8045 | 0.37735 | 0.003083 | 0.0339255 | Up-regulated |
| NM_000598    | IGFBP3    | 3486   | 120.104  | 123.162  | 152.533 | 162.063 | 0.37894 | 1.37E-09 | 1.93E-07  | Up-regulated |
| NM_004436    | ENSA      | 2029   | 52.5246  | 43.8955  | 63.1592 | 62.9007 | 0.38071 | 0.000749 | 0.012484  | Up-regulated |
| NM_022132    | MCCC2     | 64087  | 17.4176  | 19.3413  | 23.1822 | 25.1028 | 0.38141 | 0.000255 | 0.0054437 | Up-regulated |
| NM_002582    | PARN      | 5073   | 11.449   | 12.5044  | 16.4668 | 15.2666 | 0.38621 | 0.000896 | 0.0142867 | Up-regulated |
| NM_001128930 | ENTPD4    | 9583   | 5.0029   | 5.86732  | 7.54136 | 7.01071 | 0.38669 | 0.003045 | 0.0337119 | Up-regulated |
| NM_002106    | H2AFZ     | 3015   | 199.576  | 215.886  | 260.868 | 277.837 | 0.38691 | 6.05E-06 | 0.0002788 | Up-regulated |
| NM_003390    | WEE1      | 7465   | 6.29195  | 7.07552  | 8.57302 | 9.39333 | 0.38757 | 0.004967 | 0.0481414 | Up-regulated |
| NM_001099285 | PTMA      | 5757   | 48.806   | 57.6805  | 65.9018 | 75.8091 | 0.38853 | 0.002906 | 0.0326965 | Up-regulated |
| NM_001144772 | NSMAF     | 8439   | 5.28565  | 5.25929  | 7.0657  | 7.08647 | 0.38901 | 0.003693 | 0.0388075 | Up-regulated |
| NM_002266    | KPNA2     | 3838   | 69.1812  | 75.1933  | 97.4147 | 91.6065 | 0.38942 | 5.01E-06 | 0.0002422 | Up-regulated |
| NM_006461    | SPAG5     | 10615  | 10.2893  | 10.6438  | 13.4345 | 14.2416 | 0.38971 | 0.00019  | 0.0043734 | Up-regulated |
| NM_001112736 | FAM208A   | 23272  | 6.34741  | 7.82188  | 9.49079 | 9.48092 | 0.38982 | 0.001833 | 0.02381   | Up-regulated |
| NM_032223    | PCNX3     | 399909 | 9.12915  | 7.23245  | 10.6449 | 11.2329 | 0.38996 | 0.002005 | 0.0253408 | Up-regulated |
| NM_005342    | HMGB3     | 3149   | 8.022    | 8.96935  | 12.1498 | 10.6742 | 0.39056 | 0.003162 | 0.0345849 | Up-regulated |
| NM_080593    | HIST1H2BK | 85236  | 64.1858  | 61.4228  | 81.3248 | 82.4174 | 0.39079 | 0.000105 | 0.002723  | Up-regulated |
| NM_002192    | INHBA     | 3624   | 4.66009  | 4.27353  | 6.04803 | 5.86891 | 0.39122 | 0.000887 | 0.0141833 | Up-regulated |
| NM_002916    | RFC4      | 5984   | 15.0226  | 15.2613  | 19.9303 | 20.6377 | 0.39148 | 0.003804 | 0.0396282 | Up-regulated |
| NM_007111    | TFDP1     | 7027   | 35.159   | 38.0182  | 48.0988 | 48.0552 | 0.39235 | 5.00E-06 | 0.0002422 | Up-regulated |
| NM_005517    | HMG2      | 3151   | 166.121  | 177.103  | 222.128 | 225.908 | 0.39308 | 1.79E-09 | 2.39E-07  | Up-regulated |
| NM_001308176 | CDH2      | 1000   | 0.002195 | 0.049674 | 7.58609 | 17.9732 | 0.39311 | 0.003762 | 0.0392934 | Up-regulated |
| NM_007192    | SUPT16H   | 11198  | 29.6966  | 32.8967  | 41.5511 | 40.8597 | 0.39325 | 3.40E-06 | 0.0001787 | Up-regulated |
| NM_001039348 | EFEMP1    | 2202   | 21.4028  | 21.1722  | 27.4045 | 28.6277 | 0.39461 | 4.16E-06 | 0.0002115 | Up-regulated |
| NM_001164803 | RBMX      | 27316  | 10.5099  | 10.6416  | 13.973  | 14.444  | 0.39579 | 0.002278 | 0.0278133 | Up-regulated |
| NM_182746    | MCM4      | 4173   | 14.778   | 15.1353  | 19.6596 | 19.8085 | 0.39806 | 1.23E-06 | 7.57E-05  | Up-regulated |
| NM_004157    | PRKAR2A   | 5576   | 4.48457  | 5.17473  | 6.30933 | 6.71914 | 0.39866 | 0.00167  | 0.022362  | Up-regulated |
| NM_015261    | NCAPD3    | 23310  | 5.84783  | 6.43995  | 8.08846 | 8.39382 | 0.40203 | 0.000437 | 0.0081392 | Up-regulated |
| NM_001136108 | R3HCC1    | 203069 | 19.7785  | 16.9305  | 23.9495 | 25.4572 | 0.40213 | 0.001965 | 0.0249347 | Up-regulated |
| NM_015577    | RAI14     | 26064  | 26.1407  | 33.4518  | 40.7766 | 39.7383 | 0.40367 | 0.00108  | 0.0162735 | Up-regulated |
| NM_001256550 | MPP5      | 64398  | 5.70021  | 4.5068   | 6.94953 | 7.01818 | 0.40751 | 0.003572 | 0.0378619 | Up-regulated |
| NR_002315    | H3F3AP4   | 440926 | 67.4646  | 73.1869  | 94.4803 | 91.9175 | 0.40875 | 3.47E-05 | 0.0011682 | Up-regulated |
| NM_057161    | KLHDC3    | 116138 | 26.4155  | 24.4343  | 33.1881 | 34.6649 | 0.40934 | 2.92E-05 | 0.00104   | Up-regulated |
| NM_004733    | SLC33A1   | 9197   | 5.5852   | 5.71227  | 7.1378  | 8.37081 | 0.41045 | 0.0034   | 0.0365655 | Up-regulated |
| NM_145185    | MAP2K7    | 5609   | 7.62101  | 6.91728  | 9.2824  | 10.5537 | 0.41127 | 0.00184  | 0.0238361 | Up-regulated |
| NM_030821    | PLA2G12A  | 81579  | 6.18141  | 6.7765   | 9.20744 | 8.3917  | 0.41287 | 0.000592 | 0.0104945 | Up-regulated |
| NM_001018006 | TPM1      | 7168   | 285.941  | 306.832  | 391.813 | 392.622 | 0.41377 | 7.52E-11 | 1.56E-08  | Up-regulated |
| NM_005246    | FER       | 2241   | 2.11568  | 2.09672  | 2.89216 | 2.81981 | 0.414   | 0.000338 | 0.0067684 | Up-regulated |
| NM_001172681 | ZNF641    | 121274 | 5.00511  | 5.63908  | 6.94619 | 7.67934 | 0.41531 | 0.002365 | 0.0285071 | Up-regulated |
| NM_005548    | KARS      | 3735   | 48.4706  | 51.4765  | 63.0086 | 70.9896 | 0.4154  | 2.38E-05 | 0.0008768 | Up-regulated |
| NM_001440    | EXTL3     | 2137   | 6.13406  | 7.21825  | 8.69938 | 9.5826  | 0.4187  | 0.000894 | 0.0142734 | Up-regulated |
| NM_004500    | HNRNPC    | 3183   | 74.1633  | 66.8826  | 102.507 | 87.381  | 0.41924 | 2.14E-05 | 0.0007996 | Up-regulated |
| NM_001206999 | CIT       | 11113  | 2.66485  | 3.09759  | 3.85012 | 4.08219 | 0.41964 | 0.001707 | 0.0226811 | Up-regulated |
| NM_001363    | DKC1      | 1736   | 36.593   | 37.8889  | 47.8799 | 51.9358 | 0.41985 | 1.22E-06 | 7.57E-05  | Up-regulated |
| NM_001033    | RRM1      | 6240   | 29.7577  | 33.1688  | 41.5879 | 43.1223 | 0.42066 | 6.25E-06 | 0.0002859 | Up-regulated |
| NM_001127671 | LIFR      | 3977   | 7.06755  | 8.39897  | 10.3647 | 10.7078 | 0.42249 | 0.000157 | 0.0037158 | Up-regulated |
| NM_000636    | SOD2      | 6648   | 407.187  | 445.862  | 581.579 | 560.079 | 0.42326 | 2.85E-10 | 4.82E-08  | Up-regulated |
| NM_001286665 | POSTN     | 10631  | 24.7528  | 31.453   | 41.6895 | 36.0508 | 0.42369 | 0.001922 | 0.0245376 | Up-regulated |
| NR_104285    | CAST      | 831    | 10.7668  | 11.3592  | 15.0735 | 15.4448 | 0.42528 | 0.001843 | 0.0238361 | Up-regulated |
| NM_175610    | TJP1      | 7082   | 4.48291  | 4.20226  | 6.49282 | 5.47883 | 0.42608 | 0.000848 | 0.013646  | Up-regulated |
| NM_001031835 | PHKB      | 5257   | 6.80841  | 7.87961  | 10.2755 | 9.85904 | 0.42634 | 0.000342 | 0.0068006 | Up-regulated |
| NM_018137    | PRMT6     | 55170  | 7.11385  | 7.22321  | 9.75722 | 10.0829 | 0.42948 | 0.001362 | 0.0192513 | Up-regulated |
| NM_022346    | NCAPG     | 64151  | 4.77766  | 5.96879  | 7.67096 | 7.39754 | 0.43037 | 0.003083 | 0.0339255 | Up-regulated |
| NM_014220    | TM4SF1    | 4071   | 149.469  | 152.926  | 202.004 | 202.438 | 0.43132 | 9.85E-14 | 3.00E-11  | Up-regulated |

## TGFβ1 induces cisplatin resistance of NSCLC by G6PD

|              |         |        |         |         |         |         |         |          |           |              |
|--------------|---------|--------|---------|---------|---------|---------|---------|----------|-----------|--------------|
| NM_000194    | HPRT1   | 3251   | 15.9742 | 18.2384 | 23.31   | 24.0917 | 0.43167 | 0.001754 | 0.0231455 | Up-regulated |
| NM_003905    | NAE1    | 8883   | 28.3578 | 31.1757 | 42.0852 | 39.0519 | 0.43222 | 7.08E-05 | 0.0019729 | Up-regulated |
| NM_001980    | STX2    | 2054   | 6.19558 | 5.06461 | 8.07165 | 7.74412 | 0.43294 | 0.003494 | 0.0374301 | Up-regulated |
| NM_006082    | TUBA1B  | 10376  | 562.011 | 572.581 | 751.942 | 764.162 | 0.43324 | 6.13E-22 | 3.96E-19  | Up-regulated |
| NM_001164758 | PRKAR1B | 5575   | 16.5578 | 15.0564 | 22.228  | 21.0098 | 0.43461 | 6.28E-05 | 0.001806  | Up-regulated |
| NM_001497    | B4GALT1 | 2683   | 22.9711 | 25.4201 | 32.5493 | 33.2455 | 0.43537 | 1.30E-06 | 7.83E-05  | Up-regulated |
| NM_006231    | POLE    | 5426   | 4.11804 | 3.9083  | 5.55678 | 5.4461  | 0.43594 | 4.40E-05 | 0.0013852 | Up-regulated |
| NM_001278461 | COBLL1  | 22837  | 7.07358 | 8.40358 | 10.4643 | 10.8643 | 0.43693 | 0.000116 | 0.0029495 | Up-regulated |
| NM_024790    | CSPP1   | 79848  | 2.71855 | 2.5776  | 3.63508 | 3.92448 | 0.4372  | 0.00509  | 0.0487722 | Up-regulated |
| NM_001071    | TYMS    | 7298   | 30.2895 | 33.6035 | 46.1245 | 41.6536 | 0.43882 | 0.000158 | 0.0037213 | Up-regulated |
| NM_002358    | MAD2L1  | 4085   | 21.1433 | 20.1516 | 28.1682 | 28.5857 | 0.44043 | 0.000155 | 0.0036835 | Up-regulated |
| NM_152407    | GRPEL2  | 134266 | 3.51027 | 3.87069 | 5.25318 | 5.20547 | 0.44187 | 0.002885 | 0.0326275 | Up-regulated |
| NM_022071    | SH2D4A  | 63898  | 6.55674 | 6.03841 | 9.47051 | 8.23445 | 0.44345 | 0.001426 | 0.0198981 | Up-regulated |
| NM_001293179 | PRSS23  | 11098  | 4.78791 | 4.65067 | 6.06498 | 7.3418  | 0.44367 | 0.002859 | 0.0324322 | Up-regulated |
| NM_005192    | CDKN3   | 1033   | 24.5081 | 26.2703 | 37.0108 | 34.0566 | 0.44505 | 0.001935 | 0.0246381 | Up-regulated |
| NM_018087    | NDC1    | 55706  | 6.66627 | 6.9682  | 9.40296 | 9.42564 | 0.44532 | 3.59E-05 | 0.0011991 | Up-regulated |
| NM_002097    | GTF3A   | 2971   | 19.7627 | 19.5205 | 26.883  | 27.4389 | 0.44538 | 0.000195 | 0.0044623 | Up-regulated |
| NM_031372    | HNRNPDL | 9987   | 24.0891 | 29.3064 | 34.7485 | 39.6898 | 0.44558 | 0.000298 | 0.0060947 | Up-regulated |
| NM_032303    | HSDL2   | 84263  | 11.8848 | 12.813  | 16.418  | 17.7095 | 0.44573 | 4.70E-05 | 0.0014697 | Up-regulated |
| NM_003318    | TTK     | 7272   | 5.70767 | 4.88825 | 7.60702 | 7.47598 | 0.44797 | 0.002617 | 0.0306007 | Up-regulated |
| NM_005687    | FARSB   | 10056  | 12.8674 | 15.9744 | 19.8631 | 20.9267 | 0.45124 | 0.001116 | 0.0166712 | Up-regulated |
| NM_000791    | DHFR    | 1719   | 12.5816 | 14.4793 | 18.3579 | 19.2784 | 0.45152 | 6.10E-05 | 0.0017652 | Up-regulated |
| NM_004523    | KIF11   | 3832   | 6.72943 | 8.0585  | 10.4717 | 10.3222 | 0.4525  | 0.000372 | 0.0072721 | Up-regulated |
| NM_005441    | CHAF1B  | 8208   | 7.16601 | 7.39736 | 10.2981 | 10.4202 | 0.45408 | 0.001362 | 0.0192513 | Up-regulated |
| NM_001083614 | EARS2   | 124454 | 4.85302 | 5.06052 | 6.88521 | 7.09703 | 0.45419 | 0.000528 | 0.0095412 | Up-regulated |
| NM_003404    | YWHAB   | 7529   | 6.09447 | 5.26403 | 7.94659 | 8.18244 | 0.4548  | 0.001306 | 0.0187206 | Up-regulated |
| NM_002945    | RPA1    | 6117   | 19.6619 | 22.7146 | 29.4954 | 29.329  | 0.456   | 8.12E-06 | 0.0003507 | Up-regulated |
| NM_006690    | MMP24   | 10893  | 18.0989 | 17.1638 | 23.4451 | 25.1637 | 0.45694 | 1.18E-07 | 1.03E-05  | Up-regulated |
| NM_006101    | NDC80   | 10403  | 11.8666 | 13.0014 | 18.3163 | 16.7011 | 0.4577  | 0.000397 | 0.0075746 | Up-regulated |
| NM_014997    | KLHDC10 | 23008  | 4.42455 | 4.74402 | 6.62224 | 6.24604 | 0.45893 | 8.58E-05 | 0.0023139 | Up-regulated |
| NM_001114092 | THUMPD3 | 25917  | 3.29006 | 3.53909 | 5.05366 | 4.84543 | 0.45898 | 0.003108 | 0.0341581 | Up-regulated |
| NM_002894    | RBBP8   | 5932   | 5.98095 | 6.6098  | 9.09863 | 8.78299 | 0.45901 | 0.00065  | 0.0112749 | Up-regulated |
| NM_005016    | PCBP2   | 5094   | 33.0579 | 28.3807 | 45.7646 | 40.0506 | 0.46089 | 3.16E-05 | 0.0011024 | Up-regulated |
| NM_001199341 | RPL17   | 6139   | 79.8022 | 84.3746 | 111.529 | 113.936 | 0.46251 | 3.01E-06 | 0.0001606 | Up-regulated |
| NM_001113378 | FANCI   | 55215  | 8.11011 | 10.5062 | 13.4714 | 13.2146 | 0.46259 | 0.001036 | 0.0157424 | Up-regulated |
| NM_005563    | STMN1   | 3925   | 50.6288 | 51.4666 | 70.7295 | 69.8331 | 0.46364 | 2.03E-08 | 2.25E-06  | Up-regulated |
| NM_018179    | ATF7IP  | 55729  | 5.25772 | 4.84506 | 7.23624 | 6.86989 | 0.46373 | 3.61E-06 | 0.0001869 | Up-regulated |
| NM_199413    | PRC1    | 9055   | 18.3309 | 15.5267 | 23.3368 | 24.1007 | 0.46542 | 2.40E-05 | 0.0008799 | Up-regulated |
| NM_018131    | CEP55   | 55165  | 14.0629 | 15.4687 | 20.9487 | 20.4758 | 0.46635 | 2.65E-05 | 0.000964  | Up-regulated |
| NM_001316    | CSE1L   | 1434   | 26.2464 | 28.6571 | 38.4404 | 37.9095 | 0.46857 | 6.78E-08 | 6.41E-06  | Up-regulated |
| NM_004701    | CCNB2   | 9133   | 31.7719 | 36.8865 | 48.5124 | 48.2374 | 0.47204 | 4.78E-05 | 0.0014832 | Up-regulated |
| NM_012405    | ICMT    | 23463  | 14.6833 | 15.4474 | 21.021  | 21.0741 | 0.47536 | 1.90E-08 | 2.12E-06  | Up-regulated |
| NM_006016    | CD164   | 8763   | 43.6097 | 45.5091 | 62.4694 | 61.3095 | 0.47587 | 6.62E-12 | 1.58E-09  | Up-regulated |
| NM_003368    | USP1    | 7398   | 11.4213 | 11.879  | 16.0995 | 16.6388 | 0.47617 | 9.13E-07 | 5.86E-05  | Up-regulated |
| NM_184043    | ALDOA   | 226    | 31.94   | 37.0997 | 47.5287 | 50.3137 | 0.47763 | 5.30E-05 | 0.0016004 | Up-regulated |
| NM_001256378 | MCMBP   | 79892  | 4.04756 | 4.9049  | 6.62213 | 6.46354 | 0.47805 | 0.001317 | 0.0188533 | Up-regulated |
| NM_012112    | TPX2    | 22974  | 27.4806 | 28.8826 | 38.8261 | 39.8629 | 0.47815 | 8.83E-10 | 1.34E-07  | Up-regulated |
| NM_018685    | ANLN    | 54443  | 33.8087 | 37.4075 | 50.4683 | 49.1731 | 0.47824 | 6.20E-09 | 7.49E-07  | Up-regulated |
| NM_031217    | KIF18A  | 81930  | 4.125   | 4.8047  | 6.95156 | 6.24665 | 0.47982 | 0.00228  | 0.0278133 | Up-regulated |
| NM_175748    | UBR7    | 55148  | 2.91684 | 3.29315 | 4.83869 | 4.46961 | 0.4801  | 0.003725 | 0.0390691 | Up-regulated |
| NM_007057    | ZWINT   | 11130  | 16.0968 | 13.2071 | 25.0289 | 18.7976 | 0.4807  | 0.004012 | 0.0411885 | Up-regulated |
| NM_182649    | PCNA    | 5111   | 26.2532 | 24.6219 | 36.2228 | 35.6299 | 0.48232 | 1.68E-05 | 0.0006476 | Up-regulated |
| NM_015560    | OPA1    | 4976   | 3.18906 | 3.14719 | 4.32536 | 4.8619  | 0.48695 | 0.000271 | 0.0057318 | Up-regulated |
| NM_022121    | PERP    | 64065  | 20.2664 | 21.7414 | 29.4592 | 29.7567 | 0.48795 | 5.50E-09 | 6.71E-07  | Up-regulated |
| NM_017975    | ZWILCH  | 55055  | 8.24835 | 9.15956 | 12.5964 | 12.4774 | 0.49029 | 5.83E-05 | 0.0017156 | Up-regulated |
| NM_194454    | KRIT1   | 889    | 3.88646 | 5.28099 | 6.88501 | 6.95299 | 0.49052 | 0.002756 | 0.0316222 | Up-regulated |
| NM_005915    | MCM6    | 4175   | 10.289  | 11.5827 | 15.4185 | 15.9069 | 0.49068 | 1.25E-05 | 0.0005094 | Up-regulated |
| NM_021927    | GUF1    | 60558  | 3.99591 | 4.74414 | 6.12192 | 6.87595 | 0.4925  | 0.001174 | 0.0172527 | Up-regulated |

## TGFβ1 induces cisplatin resistance of NSCLC by G6PD

|              |          |        |          |          |         |         |         |          |           |              |
|--------------|----------|--------|----------|----------|---------|---------|---------|----------|-----------|--------------|
| NM_001145966 | MKI67    | 4288   | 1.65771  | 1.55561  | 2.2867  | 2.40757 | 0.49628 | 0.000166 | 0.003887  | Up-regulated |
| NM_199161    | SAA1     | 6288   | 170.343  | 131.276  | 210.648 | 215.385 | 0.49735 | 9.56E-05 | 0.0025235 | Up-regulated |
| NM_017779    | DEPDC1   | 55635  | 4.47587  | 5.67821  | 7.27088 | 7.84624 | 0.49742 | 0.001021 | 0.0155699 | Up-regulated |
| NM_030797    | FAM49A   | 81553  | 5.63812  | 6.02114  | 9.31743 | 7.78992 | 0.49792 | 0.000267 | 0.0056798 | Up-regulated |
| NM_005154    | USP8     | 9101   | 4.31226  | 3.8616   | 5.88464 | 6.00521 | 0.49802 | 6.98E-05 | 0.0019504 | Up-regulated |
| NM_001037501 | NBPF8    | 728841 | 3.2086   | 2.32126  | 4.17997 | 4.38939 | 0.49978 | 0.004488 | 0.0446011 | Up-regulated |
| NM_014736    | KIAA0101 | 9768   | 30.1113  | 30.3125  | 42.5679 | 43.5776 | 0.50153 | 3.88E-07 | 2.82E-05  | Up-regulated |
| NM_001424    | EMP2     | 2013   | 3.51306  | 3.87186  | 5.13701 | 5.79477 | 0.50188 | 0.000402 | 0.0076633 | Up-regulated |
| NM_016312    | WBP11    | 51729  | 14.6275  | 17.0291  | 22.7498 | 23.1721 | 0.50397 | 2.33E-05 | 0.00086   | Up-regulated |
| NM_003218    | TERF1    | 7013   | 5.2001   | 5.19946  | 7.83932 | 7.58914 | 0.50439 | 0.000458 | 0.0084581 | Up-regulated |
| NM_001010851 | ZNF766   | 90321  | 3.50437  | 4.40053  | 6.19173 | 6.07048 | 0.50682 | 0.00333  | 0.0360922 | Up-regulated |
| NM_016343    | CENPF    | 1063   | 3.28553  | 4.15593  | 5.49163 | 5.52688 | 0.50683 | 0.000215 | 0.0047624 | Up-regulated |
| NM_012308    | KDM2A    | 22992  | 4.52045  | 3.73833  | 6.2333  | 5.89606 | 0.50858 | 7.44E-05 | 0.0020629 | Up-regulated |
| NM_014077    | FAM32A   | 26017  | 34.0447  | 34.8859  | 52.836  | 46.6536 | 0.51003 | 4.01E-06 | 0.0002046 | Up-regulated |
| NM_021067    | GINS1    | 9837   | 6.34323  | 5.88823  | 9.2136  | 8.80304 | 0.51211 | 8.36E-05 | 0.0022713 | Up-regulated |
| NM_014584    | ERO1A    | 30001  | 9.98368  | 11.2285  | 15.4343 | 15.2956 | 0.51286 | 5.85E-07 | 3.99E-05  | Up-regulated |
| NM_001286734 | CENPE    | 1062   | 2.33825  | 2.32611  | 3.60364 | 3.31075 | 0.5166  | 8.50E-05 | 0.0022986 | Up-regulated |
| NM_017519    | ARID1B   | 57492  | 0.986295 | 0.998416 | 1.36288 | 1.87008 | 0.52119 | 0.005085 | 0.0487706 | Up-regulated |
| NM_001079818 | ITGA6    | 3655   | 2.63568  | 2.3347   | 4.06338 | 3.54515 | 0.52235 | 0.000787 | 0.0129107 | Up-regulated |
| NM_080668    | CDCA5    | 113130 | 11.0443  | 9.68372  | 15.0812 | 15.5682 | 0.52434 | 2.18E-05 | 0.0008105 | Up-regulated |
| NM_025075    | THOC7    | 80145  | 40.3547  | 43.4173  | 63.7804 | 58.4658 | 0.52443 | 7.02E-06 | 0.0003095 | Up-regulated |
| NM_020824    | ARHGAP21 | 57584  | 8.28138  | 9.66645  | 13.0976 | 13.2755 | 0.5256  | 1.60E-06 | 9.14E-05  | Up-regulated |
| NM_004336    | BUB1     | 699    | 11.9328  | 11.8772  | 16.8853 | 17.8163 | 0.5267  | 6.85E-08 | 6.43E-06  | Up-regulated |
| NM_015185    | ARHGEF9  | 23229  | 2.09841  | 1.8708   | 3.35059 | 2.87902 | 0.52694 | 0.001831 | 0.02381   | Up-regulated |
| NM_004237    | TRIP13   | 9319   | 9.04347  | 9.17473  | 13.9323 | 13.1535 | 0.52792 | 3.43E-05 | 0.0011613 | Up-regulated |
| NM_002388    | MCM3     | 4172   | 14.963   | 16.945   | 22.9739 | 23.8994 | 0.52888 | 1.24E-06 | 7.60E-05  | Up-regulated |
| NM_001092    | ABR      | 29     | 7.56371  | 9.21215  | 12.5273 | 12.5061 | 0.52988 | 3.07E-05 | 0.0010812 | Up-regulated |
| NM_020675    | SPC25    | 57405  | 8.39765  | 9.13933  | 13.2757 | 14.2055 | 0.53067 | 0.001531 | 0.0209901 | Up-regulated |
| NM_001006622 | WDR33    | 55339  | 2.48249  | 2.79689  | 4.25081 | 4.2145  | 0.53072 | 0.002949 | 0.0329441 | Up-regulated |
| NM_021163    | RBAK     | 57786  | 4.17492  | 4.25109  | 6.20202 | 6.22725 | 0.53074 | 1.77E-06 | 0.0001003 | Up-regulated |
| NM_001973    | ELK4     | 2005   | 1.95559  | 2.0814   | 3.13556 | 2.89742 | 0.53168 | 2.68E-05 | 0.0009722 | Up-regulated |
| NM_001165412 | NFKB1    | 4790   | 4.41137  | 7.07096  | 9.56629 | 9.21746 | 0.53205 | 0.003757 | 0.0392934 | Up-regulated |
| NM_004390    | CTSH     | 1512   | 26.066   | 26.5579  | 38.339  | 38.7523 | 0.53505 | 2.17E-07 | 1.74E-05  | Up-regulated |
| NM_182811    | PLCG1    | 5335   | 2.31767  | 2.22291  | 3.20405 | 3.96884 | 0.53618 | 0.001472 | 0.0203301 | Up-regulated |
| NM_001145299 | EXOC7    | 23265  | 2.05902  | 2.44962  | 3.91004 | 3.33057 | 0.53794 | 0.002054 | 0.025748  | Up-regulated |
| NM_198847    | FAM111A  | 63901  | 2.51581  | 2.93223  | 4.99301 | 3.973   | 0.53913 | 0.003383 | 0.0364205 | Up-regulated |
| NM_001321191 | RUVBL2   | 10856  | 38.0702  | 27.5751  | 49.1211 | 50.4832 | 0.53926 | 0.000147 | 0.0035063 | Up-regulated |
| NM_001067    | TOP2A    | 7153   | 41.1768  | 45.708   | 66.1097 | 61.1633 | 0.53947 | 2.53E-10 | 4.41E-08  | Up-regulated |
| NM_198335    | GANAB    | 23193  | 10.7889  | 12.9114  | 18.5492 | 17.0583 | 0.54005 | 1.74E-05 | 0.0006633 | Up-regulated |
| NM_001297704 | ADGRL2   | 23266  | 9.71259  | 9.84521  | 14.3176 | 14.4363 | 0.54517 | 1.37E-10 | 2.60E-08  | Up-regulated |
| NM_052917    | GALNT13  | 114805 | 2.23423  | 2.60828  | 3.80263 | 3.74926 | 0.54651 | 0.000433 | 0.0080949 | Up-regulated |
| NM_001809    | CENPA    | 1058   | 6.86081  | 8.66526  | 11.9144 | 13.6125 | 0.54712 | 0.002644 | 0.0308268 | Up-regulated |
| NM_001080415 | U2SURP   | 23350  | 3.23961  | 4.87669  | 6.91217 | 6.24223 | 0.55048 | 0.001488 | 0.0205036 | Up-regulated |
| NM_001291412 | SON      | 6651   | 4.56813  | 5.19397  | 8.3366  | 7.22242 | 0.55205 | 0.000983 | 0.0152259 | Up-regulated |
| NM_001128914 | PCBP2    | 5094   | 4.65688  | 3.6461   | 6.83107 | 6.47301 | 0.5521  | 0.00099  | 0.0152841 | Up-regulated |
| NM_182620    | SKA2     | 348235 | 9.82475  | 9.96499  | 14.9187 | 14.7847 | 0.55719 | 4.26E-07 | 3.01E-05  | Up-regulated |
| NM_152624    | DCP2     | 167227 | 1.44737  | 1.89442  | 2.63798 | 2.70133 | 0.55935 | 0.000534 | 0.0096233 | Up-regulated |
| NM_001786    | CDK1     | 983    | 19.9781  | 21.5982  | 31.0477 | 31.299  | 0.56007 | 1.80E-07 | 1.49E-05  | Up-regulated |
| NM_018369    | DEPDC1B  | 55789  | 4.0817   | 4.85556  | 7.83902 | 6.81324 | 0.56286 | 0.001212 | 0.0177464 | Up-regulated |
| NM_005053    | RAD23A   | 5886   | 27.4679  | 26.3638  | 37.1697 | 44.6033 | 0.56499 | 3.26E-06 | 0.0001732 | Up-regulated |
| NM_006406    | PRDX4    | 10549  | 35.6042  | 37.0908  | 52.0857 | 57.8543 | 0.56515 | 6.54E-06 | 0.0002954 | Up-regulated |
| NM_152455    | ZSCAN29  | 146050 | 1.51905  | 1.50525  | 2.75812 | 2.28438 | 0.56705 | 0.001612 | 0.0217677 | Up-regulated |
| NM_005496    | SMC4     | 10051  | 3.023    | 3.09445  | 4.58826 | 4.93045 | 0.56845 | 4.20E-05 | 0.0013395 | Up-regulated |
| NM_153695    | ZNF367   | 195828 | 6.30511  | 5.92705  | 8.84568 | 10.0078 | 0.56865 | 1.37E-05 | 0.0005512 | Up-regulated |
| NM_001260489 | LSR      | 51599  | 5.0508   | 3.81828  | 7.42795 | 7.38934 | 0.57041 | 0.001594 | 0.0215883 | Up-regulated |
| NM_014109    | ATAD2    | 29028  | 6.33064  | 7.4632   | 10.5315 | 10.6286 | 0.57105 | 2.64E-06 | 0.0001436 | Up-regulated |
| NM_016195    | KIF20B   | 9585   | 3.39183  | 3.253    | 4.98606 | 5.23006 | 0.57167 | 3.65E-06 | 0.0001881 | Up-regulated |

## TGFβ1 induces cisplatin resistance of NSCLC by G6PD

|              |          |        |          |          |          |          |         |          |           |              |
|--------------|----------|--------|----------|----------|----------|----------|---------|----------|-----------|--------------|
| NM_001254    | CDC6     | 990    | 9.2826   | 9.11711  | 15.1649  | 13.1468  | 0.57224 | 6.07E-06 | 0.0002788 | Up-regulated |
| NM_001083314 | CHMP1A   | 5119   | 3.759    | 3.32725  | 7.03821  | 5.30202  | 0.57243 | 0.002676 | 0.0310646 | Up-regulated |
| NM_005397    | PODXL    | 5420   | 17.6568  | 16.9897  | 24.5734  | 27.5853  | 0.57547 | 8.53E-11 | 1.73E-08  | Up-regulated |
| NM_001098525 | CKAP2    | 26586  | 4.81088  | 5.34273  | 6.9712   | 9.8602   | 0.57659 | 0.000899 | 0.0142913 | Up-regulated |
| NM_024745    | SHCBP1   | 79801  | 6.43639  | 7.58883  | 11.2164  | 10.7441  | 0.58017 | 2.64E-05 | 0.0009625 | Up-regulated |
| NM_006479    | RAD51AP1 | 10635  | 5.35517  | 4.7529   | 8.28041  | 8.22939  | 0.58762 | 0.000296 | 0.0060801 | Up-regulated |
| NM_007346    | OGFR     | 11054  | 25.0696  | 19.5477  | 33.3896  | 36.2819  | 0.5878  | 7.09E-06 | 0.0003114 | Up-regulated |
| NM_001048201 | UHRF1    | 29128  | 8.62757  | 9.44194  | 13.7924  | 13.9664  | 0.5881  | 7.57E-08 | 7.05E-06  | Up-regulated |
| NM_002915    | RFC3     | 5983   | 3.48771  | 3.94644  | 6.6354   | 5.94594  | 0.58931 | 0.000964 | 0.0150409 | Up-regulated |
| NM_133474    | ZNF721   | 170960 | 3.0936   | 2.99248  | 4.71734  | 4.9542   | 0.58941 | 3.94E-05 | 0.001287  | Up-regulated |
| NM_001143842 | TMEM106C | 79022  | 21.2792  | 19.6818  | 44.3939  | 26.4594  | 0.58958 | 0.001506 | 0.0206685 | Up-regulated |
| NM_006499    | LGALS8   | 3964   | 1.59563  | 1.16594  | 2.17528  | 2.78061  | 0.59262 | 0.002107 | 0.026199  | Up-regulated |
| NM_017512    | ENOSF1   | 55556  | 6.11652  | 6.78033  | 9.99799  | 9.96817  | 0.59467 | 9.72E-08 | 8.82E-06  | Up-regulated |
| NM_002543    | OLR1     | 4973   | 13.8195  | 13.5094  | 20.8288  | 21.1521  | 0.595   | 8.73E-09 | 1.02E-06  | Up-regulated |
| NM_030648    | SETD7    | 80854  | 2.22745  | 2.39466  | 3.66858  | 3.66163  | 0.59654 | 1.00E-05 | 0.000424  | Up-regulated |
| NM_138555    | KIF23    | 9493   | 4.69182  | 5.7142   | 8.35285  | 8.34962  | 0.59656 | 4.87E-05 | 0.0015033 | Up-regulated |
| NM_001284301 | ANLN     | 54443  | 14.9571  | 15.2568  | 24.278   | 22.0355  | 0.59753 | 1.46E-10 | 2.73E-08  | Up-regulated |
| NM_032440    | LCOR     | 84458  | 1.02725  | 0.602338 | 1.59307  | 1.5109   | 0.60053 | 0.002724 | 0.0313537 | Up-regulated |
| NM_152437    | ZNF664   | 144348 | 14.7735  | 16.6274  | 23.8244  | 24.7096  | 0.60218 | 2.03E-09 | 2.68E-07  | Up-regulated |
| NM_006599    | NFAT5    | 10725  | 3.44775  | 2.4534   | 4.25575  | 5.67242  | 0.60343 | 0.000387 | 0.007467  | Up-regulated |
| NM_012310    | KIF4A    | 24137  | 5.62815  | 6.42165  | 9.3235   | 9.70336  | 0.6041  | 1.38E-06 | 8.25E-05  | Up-regulated |
| NM_001271953 | TPGS2    | 25941  | 5.0401   | 7.46638  | 10.1054  | 16.2769  | 0.60419 | 0.003549 | 0.0376911 | Up-regulated |
| NM_001168    | BIRC5    | 332    | 18.5071  | 19.5325  | 28.5279  | 30.2431  | 0.60549 | 7.97E-10 | 1.25E-07  | Up-regulated |
| NM_014708    | KNTC1    | 9735   | 2.45447  | 2.54416  | 3.88717  | 4.0736   | 0.60679 | 4.76E-06 | 0.0002365 | Up-regulated |
| NM_001177639 | DAG1     | 1605   | 1.01217  | 1.59816  | 2.15101  | 3.57407  | 0.6091  | 0.00338  | 0.0364205 | Up-regulated |
| NM_018132    | CENPQ    | 55166  | 4.66256  | 4.75978  | 8.762    | 7.69501  | 0.60985 | 0.000819 | 0.0132689 | Up-regulated |
| NM_001126337 | TUFT1    | 7286   | 11.6225  | 12.2193  | 17.2044  | 20.6562  | 0.61089 | 1.84E-06 | 0.0001035 | Up-regulated |
| NM_003298    | NR2C2    | 7182   | 1.732    | 1.918    | 3.3314   | 2.72467  | 0.6129  | 0.00011  | 0.0028144 | Up-regulated |
| NM_012381    | ORC3     | 23595  | 3.39999  | 3.60147  | 6.36277  | 5.67162  | 0.61703 | 0.000409 | 0.0077768 | Up-regulated |
| NM_015250    | BICD2    | 23299  | 4.66353  | 5.31983  | 8.1238   | 7.98063  | 0.62652 | 1.28E-06 | 7.79E-05  | Up-regulated |
| NM_152562    | CDCA2    | 157313 | 1.98468  | 2.64932  | 4.64831  | 3.87981  | 0.62938 | 0.00091  | 0.0144341 | Up-regulated |
| NM_001142556 | HMMR     | 3161   | 3.4112   | 3.22255  | 6.35024  | 5.17354  | 0.62988 | 0.000276 | 0.005786  | Up-regulated |
| NM_001278462 | MDM2     | 4193   | 0.800655 | 1.16751  | 1.58505  | 3.27856  | 0.63053 | 0.002468 | 0.0293324 | Up-regulated |
| NM_024629    | CENPU    | 79682  | 4.5648   | 4.44247  | 7.62149  | 7.54319  | 0.63881 | 4.24E-05 | 0.0013424 | Up-regulated |
| NM_145810    | CDCA7    | 83879  | 5.12444  | 5.92859  | 9.61584  | 9.01455  | 0.63937 | 3.61E-05 | 0.0011998 | Up-regulated |
| NM_001135244 | TCOF1    | 6949   | 2.26383  | 2.7162   | 5.28376  | 3.81856  | 0.64841 | 0.000428 | 0.0080256 | Up-regulated |
| NM_005578    | LPP      | 4026   | 1.93832  | 1.63966  | 3.41943  | 2.62991  | 0.65113 | 1.67E-05 | 0.0006476 | Up-regulated |
| NM_001079812 | DIAPH1   | 1729   | 2.01117  | 2.28867  | 3.74117  | 3.58954  | 0.65211 | 2.77E-05 | 0.0009975 | Up-regulated |
| NM_170697    | ALDH1A2  | 8854   | 16.8447  | 23.0438  | 43.9944  | 28.5157  | 0.65522 | 0.000298 | 0.0060947 | Up-regulated |
| NM_001003722 | GLE1     | 2733   | 9.10633  | 8.93634  | 14.7427  | 14.3724  | 0.65584 | 8.93E-10 | 1.34E-07  | Up-regulated |
| NR_136611    | PARP6    | 56965  | 4.09052  | 3.18688  | 7.22123  | 6.06873  | 0.65634 | 0.000315 | 0.0063921 | Up-regulated |
| NM_004612    | TGFBR1   | 7046   | 1.88076  | 2.5402   | 3.84572  | 3.98591  | 0.66388 | 8.94E-05 | 0.0023887 | Up-regulated |
| NM_001024807 | APLP1    | 333    | 2.55502  | 3.44981  | 5.26298  | 6.75763  | 0.66925 | 0.000708 | 0.0119724 | Up-regulated |
| NM_020127    | TUFT1    | 7286   | 8.57366  | 9.55385  | 16.294   | 14.114   | 0.67458 | 3.79E-07 | 2.79E-05  | Up-regulated |
| NM_001948    | DUT      | 1854   | 10.2168  | 11.6809  | 19.3211  | 17.8514  | 0.68015 | 1.39E-06 | 8.25E-05  | Up-regulated |
| NM_001143841 | TMEM106C | 79022  | 15.2661  | 17.7492  | 45.2532  | 23.2724  | 0.68024 | 0.000702 | 0.0119111 | Up-regulated |
| NM_206855    | QKI      | 9444   | 0.360379 | 0.444739 | 0.873975 | 0.714677 | 0.68228 | 0.000392 | 0.0075062 | Up-regulated |
| NR_027873    | PAXBP1   | 94104  | 2.59895  | 2.53303  | 4.25067  | 5.01276  | 0.69588 | 3.04E-05 | 0.0010753 | Up-regulated |
| NM_177424    | STX12    | 23673  | 5.71898  | 6.57272  | 10.9242  | 10.2792  | 0.69758 | 6.06E-07 | 4.11E-05  | Up-regulated |
| NM_182946    | NIN      | 51199  | 1.018    | 1.20359  | 2.21254  | 2.04154  | 0.7023  | 0.000116 | 0.0029412 | Up-regulated |
| NM_001202502 | NIPSNAP1 | 8508   | 6.06731  | 7.61934  | 11.5464  | 14.5009  | 0.71961 | 5.04E-05 | 0.0015453 | Up-regulated |
| NM_001319999 | RACGAP1  | 29127  | 11.0092  | 9.84637  | 17.7858  | 17.7099  | 0.72652 | 2.41E-11 | 5.40E-09  | Up-regulated |
| NM_002482    | NASP     | 4678   | 12.5394  | 13.401   | 21.3426  | 23.1612  | 0.73926 | 2.11E-12 | 5.66E-10  | Up-regulated |
| NM_001127380 | SAA2     | 6289   | 14.5799  | 15.6263  | 25.3103  | 26.9924  | 0.7429  | 1.12E-10 | 2.20E-08  | Up-regulated |
| NM_001099650 | GXYLT1   | 283464 | 4.64917  | 5.67234  | 10.1285  | 8.466    | 0.74512 | 1.68E-07 | 1.40E-05  | Up-regulated |
| NM_181471    | RFC2     | 5982   | 7.59054  | 8.26763  | 14.9757  | 13.9094  | 0.74605 | 8.86E-07 | 5.73E-05  | Up-regulated |
| NM_004724    | ZW10     | 9183   | 3.64776  | 4.21873  | 7.24923  | 7.39685  | 0.75057 | 2.47E-06 | 0.0001364 | Up-regulated |

## TGFβ1 induces cisplatin resistance of NSCLC by G6PD

|              |        |       |          |          |         |         |         |          |           |              |
|--------------|--------|-------|----------|----------|---------|---------|---------|----------|-----------|--------------|
| NM_080911    | UNG    | 7374  | 5.20047  | 6.70238  | 10.9088 | 12.1601 | 0.7574  | 1.24E-05 | 0.0005069 | Up-regulated |
| NM_014282    | HABP4  | 22927 | 7.22039  | 6.60979  | 13.3693 | 11.7755 | 0.76666 | 3.45E-08 | 3.56E-06  | Up-regulated |
| NM_001330700 | TOP2B  | 7155  | 3.05627  | 2.58699  | 4.70967 | 6.20103 | 0.76893 | 4.83E-06 | 0.0002369 | Up-regulated |
| NM_001284388 | NOLC1  | 9221  | 1.77959  | 1.9532   | 5.47742 | 3.3285  | 0.77117 | 0.000138 | 0.0033741 | Up-regulated |
| NM_001282873 | UBR5   | 51366 | 1.04427  | 1.49908  | 2.25964 | 3.18154 | 0.77447 | 4.95E-05 | 0.0015224 | Up-regulated |
| NM_002466    | MYBL2  | 4605  | 12.0199  | 12.2255  | 21.431  | 21.2952 | 0.78124 | 1.66E-14 | 5.88E-12  | Up-regulated |
| NR_034009    | SRSF6  | 6431  | 2.76951  | 2.30268  | 4.93355 | 5.12781 | 0.81054 | 7.72E-07 | 5.11E-05  | Up-regulated |
| NM_203504    | G3BP2  | 9908  | 14.5459  | 15.4901  | 27.0479 | 26.5294 | 0.81073 | 1.20E-20 | 6.30E-18  | Up-regulated |
| NM_004741    | NOLC1  | 9221  | 4.35879  | 4.06316  | 7.17679 | 12.1563 | 0.84545 | 1.00E-05 | 0.000424  | Up-regulated |
| NM_001320570 | ADAM10 | 102   | 0.975843 | 1.26181  | 3.75021 | 2.372   | 0.84847 | 3.62E-05 | 0.0012014 | Up-regulated |
| NM_014829    | DDX46  | 9879  | 0.98689  | 1.42565  | 3.94855 | 2.60339 | 0.87653 | 1.64E-05 | 0.0006379 | Up-regulated |
| NM_001034    | RRM2   | 6241  | 3.79539  | 5.4564   | 10.3266 | 9.87954 | 0.88529 | 3.53E-07 | 2.62E-05  | Up-regulated |
| NM_001272053 | MRFAP1 | 93621 | 4.85644  | 6.814    | 12.2615 | 14.4572 | 0.89755 | 7.98E-07 | 5.25E-05  | Up-regulated |
| NM_001284389 | NOLC1  | 9221  | 7.45924  | 10.3423  | 20.6681 | 18.5189 | 0.95587 | 9.65E-10 | 1.43E-07  | Up-regulated |
| NM_198334    | GANAB  | 23193 | 51.8807  | 52.5783  | 101.576 | 101.819 | 0.95965 | 3.23E-70 | 1.78E-66  | Up-regulated |
| NM_022111    | CLSPN  | 63967 | 0.816136 | 1.04094  | 2.06914 | 2.45689 | 0.96259 | 1.15E-07 | 1.02E-05  | Up-regulated |
| NM_001287135 | CDK14  | 5218  | 3.99112  | 4.60451  | 8.98004 | 9.21082 | 0.98221 | 8.02E-15 | 3.04E-12  | Up-regulated |
| NM_003290    | TPM4   | 7171  | 70.618   | 77.9118  | 146.57  | 154.443 | 0.99553 | 2.30E-35 | 3.15E-32  | Up-regulated |
| NM_001142269 | GGCX   | 2677  | 1.2031   | 0.959631 | 2.87471 | 3.08918 | 1.17446 | 2.38E-12 | 6.21E-10  | Up-regulated |
| NM_015154    | MESDC2 | 23184 | 5.41018  | 6.06701  | 15.1009 | 14.6192 | 1.27029 | 4.72E-28 | 5.19E-25  | Up-regulated |
| NM_001328615 | HSD3B1 | 3283  | 6.60148  | 7.52487  | 21.324  | 22.582  | 1.41155 | 1.37E-21 | 7.93E-19  | Up-regulated |
| NM_001293696 | SEPT9  | 10801 | 0        | 0.016527 | 12.6545 | 9.95299 | 3.85441 | 2.73E-84 | 3.00E-80  | Up-regulated |
